# Supplementary material for: Systematic analysis identifies XRCC4 as a potential immunological and prognostic biomarker associated with pan-cancer
Source: BMC Bioinformatics. 2023 Feb 10;24:44. doi: 10.1186/s12859-023-05165-8 (PMC9921312; doi:10.1186/s12859-023-05165-8)
Supplement: Supplementary file 5 — Additional file 5. Correlation between XRCC4 expression and immune cells infiltarion in pan-cancer. [file 12859_2023_5165_MOESM5_ESM.xlsx]

## Sheet: TableS1
Table S2 Correlation between XRCC4 expression and immune cells infiltarion in pan-cancer
Cancer	Infiltrates	rho	P	FDR
ACC (n=79)	T cell CD4+ (non-regulatory)_QUANTISEQ	0.0217189	0.855281	0.933489
ACC (n=79)	T cell CD4+ (non-regulatory)_XCELL	0.154867	0.190786	0.368696
ACC (n=79)	T cell CD4+ central memory_XCELL	-0.138331	0.243162	0.436381
ACC (n=79)	T cell CD4+ effector memory_XCELL	-0.279188	0.0167574	0.0583268
ACC (n=79)	T cell CD4+ memory activated_CIBERSORT	0.0234297	0.844019	0.926362
ACC (n=79)	T cell CD4+ memory activated_CIBERSORT-ABS	0.0234297	0.844019	0.926362
ACC (n=79)	T cell CD4+ memory resting_CIBERSORT	0.0682013	0.566426	0.743434
ACC (n=79)	T cell CD4+ memory resting_CIBERSORT-ABS	0.0724725	0.542313	0.729481
ACC (n=79)	T cell CD4+ memory_XCELL	-0.0653056	0.583055	0.760507
ACC (n=79)	T cell CD4+ naive_CIBERSORT	0.313152	0.00698408	0.0305768
ACC (n=79)	T cell CD4+ naive_CIBERSORT-ABS	0.314221	0.00678316	0.0303077
ACC (n=79)	T cell CD4+ naive_XCELL	0.148416	0.210157	0.39522
ACC (n=79)	T cell CD4+ Th1_XCELL	-0.184508	0.118128	0.265236
ACC (n=79)	T cell CD4+ Th2_XCELL	0.172822	0.143706	0.296835
ACC (n=79)	T cell CD4+_EPIC	0.225611	0.0549628	0.148471
ACC (n=79)	T cell CD4+_TIMER	-0.0387829	0.744602	0.878463
BLCA (n=408)	T cell CD4+ (non-regulatory)_QUANTISEQ	-0.0103203	0.843585	0.926362
BLCA (n=408)	T cell CD4+ (non-regulatory)_XCELL	-0.0367611	0.482032	0.677857
BLCA (n=408)	T cell CD4+ central memory_XCELL	-0.359616	1.12254e-12	5.44002e-11
BLCA (n=408)	T cell CD4+ effector memory_XCELL	-0.0693857	0.184138	0.360271
BLCA (n=408)	T cell CD4+ memory activated_CIBERSORT	0.225769	1.22636e-05	0.000117062
BLCA (n=408)	T cell CD4+ memory activated_CIBERSORT-ABS	0.225014	1.31346e-05	0.000123505
BLCA (n=408)	T cell CD4+ memory resting_CIBERSORT	0.000131597	0.997993	0.999579
BLCA (n=408)	T cell CD4+ memory resting_CIBERSORT-ABS	0.058611	0.262078	0.453597
BLCA (n=408)	T cell CD4+ memory_XCELL	0.230684	7.79768e-06	7.67585e-05
BLCA (n=408)	T cell CD4+ naive_CIBERSORT	-0.137694	0.0081679	0.0343052
BLCA (n=408)	T cell CD4+ naive_CIBERSORT-ABS	-0.131643	0.0114792	0.0438906
BLCA (n=408)	T cell CD4+ naive_XCELL	-0.112495	0.0309638	0.0933358
BLCA (n=408)	T cell CD4+ Th1_XCELL	0.145801	0.00507218	0.0238468
BLCA (n=408)	T cell CD4+ Th2_XCELL	0.396065	2.85045e-15	1.79579e-13
BLCA (n=408)	T cell CD4+_EPIC	-0.100709	0.0535727	0.145478
BLCA (n=408)	T cell CD4+_TIMER	-0.0643692	0.217989	0.403921
BRCA (n=1100)	T cell CD4+ (non-regulatory)_QUANTISEQ	0.158905	4.7623e-07	5.88284e-06
BRCA (n=1100)	T cell CD4+ (non-regulatory)_XCELL	0.0199013	0.530846	0.722317
BRCA (n=1100)	T cell CD4+ central memory_XCELL	-0.249827	1.30991e-15	1.03156e-13
BRCA (n=1100)	T cell CD4+ effector memory_XCELL	-0.0823936	0.00935405	0.0385167
BRCA (n=1100)	T cell CD4+ memory activated_CIBERSORT	0.00255237	0.935944	0.976494
BRCA (n=1100)	T cell CD4+ memory activated_CIBERSORT-ABS	0.00354432	0.911137	0.967987
BRCA (n=1100)	T cell CD4+ memory resting_CIBERSORT	0.0538683	0.0896133	0.21385
BRCA (n=1100)	T cell CD4+ memory resting_CIBERSORT-ABS	0.0811449	0.0104877	0.0420844
BRCA (n=1100)	T cell CD4+ memory_XCELL	0.184266	4.84648e-09	1.01776e-07
BRCA (n=1100)	T cell CD4+ naive_CIBERSORT	-0.00814144	0.797671	0.903836
BRCA (n=1100)	T cell CD4+ naive_CIBERSORT-ABS	-0.00837583	0.791978	0.902155
BRCA (n=1100)	T cell CD4+ naive_XCELL	-0.0502447	0.113396	0.256056
BRCA (n=1100)	T cell CD4+ Th1_XCELL	-0.305377	6.71852e-23	2.11633e-20
BRCA (n=1100)	T cell CD4+ Th2_XCELL	0.122735	0.000104725	0.00082471
BRCA (n=1100)	T cell CD4+_EPIC	0.150987	1.7378e-06	1.82469e-05
BRCA (n=1100)	T cell CD4+_TIMER	-0.16609	1.39062e-07	1.99111e-06
BRCA-Basal (n=191)	T cell CD4+ (non-regulatory)_QUANTISEQ	0.0822478	0.280618	0.472699
BRCA-Basal (n=191)	T cell CD4+ (non-regulatory)_XCELL	-0.0332287	0.663361	0.819446
BRCA-Basal (n=191)	T cell CD4+ central memory_XCELL	-0.0867102	0.255251	0.444222
BRCA-Basal (n=191)	T cell CD4+ effector memory_XCELL	0.121812	0.109334	0.251388
BRCA-Basal (n=191)	T cell CD4+ memory activated_CIBERSORT	-0.0352332	0.644403	0.803428
BRCA-Basal (n=191)	T cell CD4+ memory activated_CIBERSORT-ABS	-0.0214997	0.778259	0.889842
BRCA-Basal (n=191)	T cell CD4+ memory resting_CIBERSORT	0.0913745	0.230475	0.420868
BRCA-Basal (n=191)	T cell CD4+ memory resting_CIBERSORT-ABS	0.156888	0.0386972	0.110313
BRCA-Basal (n=191)	T cell CD4+ memory_XCELL	0.203759	0.00700218	0.0305768
BRCA-Basal (n=191)	T cell CD4+ naive_CIBERSORT	-0.0889425	0.243174	0.436381
BRCA-Basal (n=191)	T cell CD4+ naive_CIBERSORT-ABS	-0.0887253	0.244331	0.436381
BRCA-Basal (n=191)	T cell CD4+ naive_XCELL	0.0786677	0.302157	0.497021
BRCA-Basal (n=191)	T cell CD4+ Th1_XCELL	-0.315432	2.23929e-05	0.000198697
BRCA-Basal (n=191)	T cell CD4+ Th2_XCELL	0.176353	0.0199246	0.0674866
BRCA-Basal (n=191)	T cell CD4+_EPIC	0.242411	0.00126954	0.00727103
BRCA-Basal (n=191)	T cell CD4+_TIMER	-0.0230529	0.7627	0.881663
BRCA-Her2 (n=82)	T cell CD4+ (non-regulatory)_QUANTISEQ	-0.0993513	0.406354	0.604027
BRCA-Her2 (n=82)	T cell CD4+ (non-regulatory)_XCELL	0.0373301	0.755556	0.881663
BRCA-Her2 (n=82)	T cell CD4+ central memory_XCELL	-0.17478	0.141986	0.294248
BRCA-Her2 (n=82)	T cell CD4+ effector memory_XCELL	-0.222654	0.0601235	0.155876
BRCA-Her2 (n=82)	T cell CD4+ memory activated_CIBERSORT	-0.102787	0.390236	0.590983
BRCA-Her2 (n=82)	T cell CD4+ memory activated_CIBERSORT-ABS	-0.1183	0.322312	0.520658
BRCA-Her2 (n=82)	T cell CD4+ memory resting_CIBERSORT	-0.16163	0.174968	0.347832
BRCA-Her2 (n=82)	T cell CD4+ memory resting_CIBERSORT-ABS	-0.203978	0.08568	0.206024
BRCA-Her2 (n=82)	T cell CD4+ memory_XCELL	0.125825	0.292263	0.487106
BRCA-Her2 (n=82)	T cell CD4+ naive_CIBERSORT	NA	NA	NA
BRCA-Her2 (n=82)	T cell CD4+ naive_CIBERSORT-ABS	NA	NA	NA
BRCA-Her2 (n=82)	T cell CD4+ naive_XCELL	-0.239771	0.0424979	0.119525
BRCA-Her2 (n=82)	T cell CD4+ Th1_XCELL	-0.374772	0.00118081	0.00688808
BRCA-Her2 (n=82)	T cell CD4+ Th2_XCELL	0.136703	0.25219	0.442531
BRCA-Her2 (n=82)	T cell CD4+_EPIC	-0.0394982	0.741841	0.878463
BRCA-Her2 (n=82)	T cell CD4+_TIMER	-0.295994	0.0115869	0.0439744
BRCA-LumA (n=568)	T cell CD4+ (non-regulatory)_QUANTISEQ	0.133751	0.00230742	0.0122157
BRCA-LumA (n=568)	T cell CD4+ (non-regulatory)_XCELL	0.028597	0.516476	0.710436
BRCA-LumA (n=568)	T cell CD4+ central memory_XCELL	-0.338271	2.63355e-15	1.79579e-13
BRCA-LumA (n=568)	T cell CD4+ effector memory_XCELL	-0.148623	0.000698922	0.00427496
BRCA-LumA (n=568)	T cell CD4+ memory activated_CIBERSORT	0.0507045	0.249794	0.440813
BRCA-LumA (n=568)	T cell CD4+ memory activated_CIBERSORT-ABS	0.0515334	0.242127	0.436381
BRCA-LumA (n=568)	T cell CD4+ memory resting_CIBERSORT	0.0988851	0.0245454	0.0794823
BRCA-LumA (n=568)	T cell CD4+ memory resting_CIBERSORT-ABS	0.149669	0.000639868	0.00399126
BRCA-LumA (n=568)	T cell CD4+ memory_XCELL	0.203794	2.98725e-06	3.08519e-05
BRCA-LumA (n=568)	T cell CD4+ naive_CIBERSORT	0.0225902	0.608322	0.778835
BRCA-LumA (n=568)	T cell CD4+ naive_CIBERSORT-ABS	0.0223898	0.611507	0.778835
BRCA-LumA (n=568)	T cell CD4+ naive_XCELL	-0.0145367	0.74159	0.878463
BRCA-LumA (n=568)	T cell CD4+ Th1_XCELL	-0.333538	6.71859e-15	3.84792e-13
BRCA-LumA (n=568)	T cell CD4+ Th2_XCELL	0.25637	3.33369e-09	7.24216e-08
BRCA-LumA (n=568)	T cell CD4+_EPIC	0.137917	0.00167028	0.00923047
BRCA-LumA (n=568)	T cell CD4+_TIMER	-0.15857	0.000294949	0.00204195
BRCA-LumB (n=219)	T cell CD4+ (non-regulatory)_QUANTISEQ	0.0845629	0.243543	0.436381
BRCA-LumB (n=219)	T cell CD4+ (non-regulatory)_XCELL	0.0833306	0.250506	0.440834
BRCA-LumB (n=219)	T cell CD4+ central memory_XCELL	-0.16487	0.0222981	0.0747224
BRCA-LumB (n=219)	T cell CD4+ effector memory_XCELL	-0.175101	0.0151309	0.0541619
BRCA-LumB (n=219)	T cell CD4+ memory activated_CIBERSORT	0.160589	0.0260738	0.0825451
BRCA-LumB (n=219)	T cell CD4+ memory activated_CIBERSORT-ABS	0.158301	0.028307	0.0874186
BRCA-LumB (n=219)	T cell CD4+ memory resting_CIBERSORT	-0.060169	0.407086	0.604027
BRCA-LumB (n=219)	T cell CD4+ memory resting_CIBERSORT-ABS	-0.0182751	0.801354	0.906379
BRCA-LumB (n=219)	T cell CD4+ memory_XCELL	0.176523	0.014315	0.0521296
BRCA-LumB (n=219)	T cell CD4+ naive_CIBERSORT	-0.0223715	0.75808	0.881663
BRCA-LumB (n=219)	T cell CD4+ naive_CIBERSORT-ABS	-0.0223715	0.75808	0.881663
BRCA-LumB (n=219)	T cell CD4+ naive_XCELL	-0.149882	0.0379871	0.109779
BRCA-LumB (n=219)	T cell CD4+ Th1_XCELL	-0.245076	0.000612318	0.00385761
BRCA-LumB (n=219)	T cell CD4+ Th2_XCELL	0.264126	0.000213998	0.00156766
BRCA-LumB (n=219)	T cell CD4+_EPIC	0.108984	0.132389	0.284659
BRCA-LumB (n=219)	T cell CD4+_TIMER	-0.101585	0.160902	0.326995
COAD (n=458)	T cell CD4+ (non-regulatory)_QUANTISEQ	-0.0367539	0.543902	0.729481
COAD (n=458)	T cell CD4+ (non-regulatory)_XCELL	-0.0525444	0.385405	0.586485
COAD (n=458)	T cell CD4+ central memory_XCELL	-0.0419805	0.488119	0.680343
COAD (n=458)	T cell CD4+ effector memory_XCELL	-0.116765	0.0530981	0.144813
COAD (n=458)	T cell CD4+ memory activated_CIBERSORT	0.0957072	0.1133	0.256056
COAD (n=458)	T cell CD4+ memory activated_CIBERSORT-ABS	0.0882626	0.144331	0.297151
COAD (n=458)	T cell CD4+ memory resting_CIBERSORT	0.00311745	0.958958	0.985552
COAD (n=458)	T cell CD4+ memory resting_CIBERSORT-ABS	0.0278794	0.645293	0.803428
COAD (n=458)	T cell CD4+ memory_XCELL	0.00630177	0.917147	0.971097
COAD (n=458)	T cell CD4+ naive_CIBERSORT	-0.0133879	0.825083	0.913536
COAD (n=458)	T cell CD4+ naive_CIBERSORT-ABS	-0.0135239	0.823335	0.913536
COAD (n=458)	T cell CD4+ naive_XCELL	0.0379685	0.530663	0.722317
COAD (n=458)	T cell CD4+ Th1_XCELL	-0.057916	0.338639	0.538706
COAD (n=458)	T cell CD4+ Th2_XCELL	0.0297676	0.623073	0.788225
COAD (n=458)	T cell CD4+_EPIC	-0.0441545	0.465855	0.663178
COAD (n=458)	T cell CD4+_TIMER	0.0181637	0.764281	0.881663
DLBC (n=48)	T cell CD4+ (non-regulatory)_QUANTISEQ	-0.251571	0.112589	0.256056
DLBC (n=48)	T cell CD4+ (non-regulatory)_XCELL	-0.110514	0.491538	0.68209
DLBC (n=48)	T cell CD4+ central memory_XCELL	-0.177592	0.266639	0.457719
DLBC (n=48)	T cell CD4+ effector memory_XCELL	-0.0328104	0.83863	0.925283
DLBC (n=48)	T cell CD4+ memory activated_CIBERSORT	0.16599	0.299642	0.494174
DLBC (n=48)	T cell CD4+ memory activated_CIBERSORT-ABS	0.169871	0.288324	0.484384
DLBC (n=48)	T cell CD4+ memory resting_CIBERSORT	0.0749932	0.641217	0.801521
DLBC (n=48)	T cell CD4+ memory resting_CIBERSORT-ABS	0.0781342	0.627269	0.790359
DLBC (n=48)	T cell CD4+ memory_XCELL	0.142564	0.373908	0.575947
DLBC (n=48)	T cell CD4+ naive_CIBERSORT	-0.00952198	0.952883	0.982324
DLBC (n=48)	T cell CD4+ naive_CIBERSORT-ABS	-0.0198218	0.902101	0.96163
DLBC (n=48)	T cell CD4+ naive_XCELL	-0.0892849	0.578804	0.756527
DLBC (n=48)	T cell CD4+ Th1_XCELL	-0.0685308	0.670296	0.823562
DLBC (n=48)	T cell CD4+ Th2_XCELL	0.36237	0.0198962	0.0674866
DLBC (n=48)	T cell CD4+_EPIC	-0.274258	0.0826971	0.201155
DLBC (n=48)	T cell CD4+_TIMER	-0.149678	0.350281	0.547585
ESCA (n=185)	T cell CD4+ (non-regulatory)_QUANTISEQ	-0.0968519	0.195874	0.376222
ESCA (n=185)	T cell CD4+ (non-regulatory)_XCELL	-0.14096	0.0591009	0.154121
ESCA (n=185)	T cell CD4+ central memory_XCELL	-0.0455398	0.543825	0.729481
ESCA (n=185)	T cell CD4+ effector memory_XCELL	-0.130452	0.0809022	0.198321
ESCA (n=185)	T cell CD4+ memory activated_CIBERSORT	0.166021	0.0259222	0.0824798
ESCA (n=185)	T cell CD4+ memory activated_CIBERSORT-ABS	0.141259	0.0585602	0.15372
ESCA (n=185)	T cell CD4+ memory resting_CIBERSORT	0.0106502	0.887162	0.959288
ESCA (n=185)	T cell CD4+ memory resting_CIBERSORT-ABS	-0.0311094	0.678457	0.826747
ESCA (n=185)	T cell CD4+ memory_XCELL	0.193496	0.00925264	0.0383497
ESCA (n=185)	T cell CD4+ naive_CIBERSORT	-0.0140644	0.851356	0.93117
ESCA (n=185)	T cell CD4+ naive_CIBERSORT-ABS	-0.0140644	0.851356	0.93117
ESCA (n=185)	T cell CD4+ naive_XCELL	-0.0811751	0.278684	0.471965
ESCA (n=185)	T cell CD4+ Th1_XCELL	0.000850996	0.990954	0.997286
ESCA (n=185)	T cell CD4+ Th2_XCELL	0.333537	4.75312e-06	4.75312e-05
ESCA (n=185)	T cell CD4+_EPIC	0.0275819	0.713214	0.857491
ESCA (n=185)	T cell CD4+_TIMER	-0.0167015	0.823902	0.913536
GBM (n=153)	T cell CD4+ (non-regulatory)_QUANTISEQ	0.242788	0.00425491	0.02062
GBM (n=153)	T cell CD4+ (non-regulatory)_XCELL	-0.0208531	0.808881	0.909991
GBM (n=153)	T cell CD4+ central memory_XCELL	-0.114245	0.183748	0.360271
GBM (n=153)	T cell CD4+ effector memory_XCELL	-0.0200839	0.815804	0.911887
GBM (n=153)	T cell CD4+ memory activated_CIBERSORT	0.0564834	0.51209	0.705944
GBM (n=153)	T cell CD4+ memory activated_CIBERSORT-ABS	0.057513	0.504416	0.696891
GBM (n=153)	T cell CD4+ memory resting_CIBERSORT	0.000338696	0.996866	0.999579
GBM (n=153)	T cell CD4+ memory resting_CIBERSORT-ABS	0.0118412	0.890768	0.959288
GBM (n=153)	T cell CD4+ memory_XCELL	0.405525	8.83514e-07	1.01202e-05
GBM (n=153)	T cell CD4+ naive_CIBERSORT	-0.041324	0.631613	0.79394
GBM (n=153)	T cell CD4+ naive_CIBERSORT-ABS	-0.0412007	0.632632	0.79394
GBM (n=153)	T cell CD4+ naive_XCELL	0.00158863	0.985301	0.993183
GBM (n=153)	T cell CD4+ Th1_XCELL	-0.333205	6.93122e-05	0.000559829
GBM (n=153)	T cell CD4+ Th2_XCELL	0.417199	3.94361e-07	5.17599e-06
GBM (n=153)	T cell CD4+_EPIC	-0.0964999	0.261959	0.453597
GBM (n=153)	T cell CD4+_TIMER	-0.266402	0.00165151	0.00920754
HNSC (n=522)	T cell CD4+ (non-regulatory)_QUANTISEQ	-0.183909	4.06105e-05	0.000345738
HNSC (n=522)	T cell CD4+ (non-regulatory)_XCELL	0.0998496	0.0267824	0.0835292
HNSC (n=522)	T cell CD4+ central memory_XCELL	-0.252859	1.29225e-08	2.38342e-07
HNSC (n=522)	T cell CD4+ effector memory_XCELL	-0.108713	0.0158486	0.0560933
HNSC (n=522)	T cell CD4+ memory activated_CIBERSORT	0.0837212	0.0635162	0.161352
HNSC (n=522)	T cell CD4+ memory activated_CIBERSORT-ABS	0.0967203	0.0319581	0.0958742
HNSC (n=522)	T cell CD4+ memory resting_CIBERSORT	0.0389558	0.388571	0.589879
HNSC (n=522)	T cell CD4+ memory resting_CIBERSORT-ABS	0.0477988	0.289993	0.485892
HNSC (n=522)	T cell CD4+ memory_XCELL	0.133789	0.00294508	0.0150678
HNSC (n=522)	T cell CD4+ naive_CIBERSORT	-0.0524146	0.245865	0.436381
HNSC (n=522)	T cell CD4+ naive_CIBERSORT-ABS	-0.0523343	0.24659	0.436381
HNSC (n=522)	T cell CD4+ naive_XCELL	0.0541666	0.230412	0.420868
HNSC (n=522)	T cell CD4+ Th1_XCELL	0.114919	0.0107416	0.0428304
HNSC (n=522)	T cell CD4+ Th2_XCELL	0.307393	3.15971e-12	1.24414e-10
HNSC (n=522)	T cell CD4+_EPIC	0.107913	0.0166417	0.0583268
HNSC (n=522)	T cell CD4+_TIMER	0.123163	0.00623124	0.0282423
HNSC-HPV- (n=422)	T cell CD4+ (non-regulatory)_QUANTISEQ	-0.105754	0.0344819	0.10247
HNSC-HPV- (n=422)	T cell CD4+ (non-regulatory)_XCELL	0.0841781	0.092709	0.219574
HNSC-HPV- (n=422)	T cell CD4+ central memory_XCELL	-0.21196	1.91482e-05	0.000174831
HNSC-HPV- (n=422)	T cell CD4+ effector memory_XCELL	-0.113941	0.0226603	0.0755344
HNSC-HPV- (n=422)	T cell CD4+ memory activated_CIBERSORT	0.0452026	0.367225	0.569831
HNSC-HPV- (n=422)	T cell CD4+ memory activated_CIBERSORT-ABS	0.056018	0.263681	0.455121
HNSC-HPV- (n=422)	T cell CD4+ memory resting_CIBERSORT	0.0481248	0.337035	0.53755
HNSC-HPV- (n=422)	T cell CD4+ memory resting_CIBERSORT-ABS	0.0285746	0.5688	0.744998
HNSC-HPV- (n=422)	T cell CD4+ memory_XCELL	0.106221	0.0336884	0.100586
HNSC-HPV- (n=422)	T cell CD4+ naive_CIBERSORT	-0.0216978	0.665269	0.820195
HNSC-HPV- (n=422)	T cell CD4+ naive_CIBERSORT-ABS	-0.0220296	0.660468	0.818668
HNSC-HPV- (n=422)	T cell CD4+ naive_XCELL	0.00145585	0.976844	0.989871
HNSC-HPV- (n=422)	T cell CD4+ Th1_XCELL	0.118589	0.0176572	0.0611211
HNSC-HPV- (n=422)	T cell CD4+ Th2_XCELL	0.317814	7.72698e-11	2.11652e-09
HNSC-HPV- (n=422)	T cell CD4+_EPIC	0.126253	0.0114952	0.0438906
HNSC-HPV- (n=422)	T cell CD4+_TIMER	0.0453936	0.365202	0.568092
HNSC-HPV+ (n=98)	T cell CD4+ (non-regulatory)_QUANTISEQ	-0.220449	0.0379008	0.109779
HNSC-HPV+ (n=98)	T cell CD4+ (non-regulatory)_XCELL	0.0449057	0.676048	0.826558
HNSC-HPV+ (n=98)	T cell CD4+ central memory_XCELL	-0.268105	0.011078	0.0438906
HNSC-HPV+ (n=98)	T cell CD4+ effector memory_XCELL	-0.030512	0.776528	0.889478
HNSC-HPV+ (n=98)	T cell CD4+ memory activated_CIBERSORT	0.129449	0.226645	0.416287
HNSC-HPV+ (n=98)	T cell CD4+ memory activated_CIBERSORT-ABS	0.14742	0.168006	0.338159
HNSC-HPV+ (n=98)	T cell CD4+ memory resting_CIBERSORT	-0.0294276	0.784274	0.895095
HNSC-HPV+ (n=98)	T cell CD4+ memory resting_CIBERSORT-ABS	0.0378634	0.724629	0.864614
HNSC-HPV+ (n=98)	T cell CD4+ memory_XCELL	0.0846825	0.430101	0.633093
HNSC-HPV+ (n=98)	T cell CD4+ naive_CIBERSORT	-0.104024	0.331987	0.530843
HNSC-HPV+ (n=98)	T cell CD4+ naive_CIBERSORT-ABS	-0.101801	0.34248	0.540757
HNSC-HPV+ (n=98)	T cell CD4+ naive_XCELL	0.0457047	0.670615	0.823562
HNSC-HPV+ (n=98)	T cell CD4+ Th1_XCELL	0.0122413	0.909352	0.967722
HNSC-HPV+ (n=98)	T cell CD4+ Th2_XCELL	0.197137	0.064067	0.162097
HNSC-HPV+ (n=98)	T cell CD4+_EPIC	0.0135401	0.899782	0.960784
HNSC-HPV+ (n=98)	T cell CD4+_TIMER	0.237958	0.0247351	0.0795055
KICH (n=66)	T cell CD4+ (non-regulatory)_QUANTISEQ	0.00837603	0.947202	0.982324
KICH (n=66)	T cell CD4+ (non-regulatory)_XCELL	-0.00560387	0.964662	0.986936
KICH (n=66)	T cell CD4+ central memory_XCELL	-0.401938	0.000904023	0.00532275
KICH (n=66)	T cell CD4+ effector memory_XCELL	-0.446807	0.000190699	0.00143024
KICH (n=66)	T cell CD4+ memory activated_CIBERSORT	NA	NA	NA
KICH (n=66)	T cell CD4+ memory activated_CIBERSORT-ABS	NA	NA	NA
KICH (n=66)	T cell CD4+ memory resting_CIBERSORT	0.0807193	0.522695	0.714346
KICH (n=66)	T cell CD4+ memory resting_CIBERSORT-ABS	0.278641	0.0246017	0.0794823
KICH (n=66)	T cell CD4+ memory_XCELL	0.277013	0.0254874	0.081508
KICH (n=66)	T cell CD4+ naive_CIBERSORT	-0.238817	0.055382	0.148471
KICH (n=66)	T cell CD4+ naive_CIBERSORT-ABS	-0.238817	0.055382	0.148471
KICH (n=66)	T cell CD4+ naive_XCELL	0.113254	0.369045	0.571249
KICH (n=66)	T cell CD4+ Th1_XCELL	-0.274835	0.0267154	0.0835292
KICH (n=66)	T cell CD4+ Th2_XCELL	0.484139	4.3869e-05	0.000363651
KICH (n=66)	T cell CD4+_EPIC	0.376886	0.00197097	0.0107044
KICH (n=66)	T cell CD4+_TIMER	-0.254157	0.0410526	0.115978
KIRC (n=533)	T cell CD4+ (non-regulatory)_QUANTISEQ	0.0839895	0.0716054	0.178306
KIRC (n=533)	T cell CD4+ (non-regulatory)_XCELL	-0.0802397	0.0852657	0.205814
KIRC (n=533)	T cell CD4+ central memory_XCELL	-0.0976732	0.0360419	0.106603
KIRC (n=533)	T cell CD4+ effector memory_XCELL	0.0160688	0.730774	0.870298
KIRC (n=533)	T cell CD4+ memory activated_CIBERSORT	0.0504256	0.27995	0.472699
KIRC (n=533)	T cell CD4+ memory activated_CIBERSORT-ABS	0.0513924	0.270821	0.463634
KIRC (n=533)	T cell CD4+ memory resting_CIBERSORT	-0.0617697	0.185531	0.361872
KIRC (n=533)	T cell CD4+ memory resting_CIBERSORT-ABS	0.0445589	0.339781	0.538706
KIRC (n=533)	T cell CD4+ memory_XCELL	0.105031	0.0241191	0.0787306
KIRC (n=533)	T cell CD4+ naive_CIBERSORT	0.0386702	0.407478	0.604027
KIRC (n=533)	T cell CD4+ naive_CIBERSORT-ABS	0.0386702	0.407478	0.604027
KIRC (n=533)	T cell CD4+ naive_XCELL	-0.12743	0.006148	0.028067
KIRC (n=533)	T cell CD4+ Th1_XCELL	-0.247418	7.37554e-08	1.19143e-06
KIRC (n=533)	T cell CD4+ Th2_XCELL	0.196711	2.10234e-05	0.00018921
KIRC (n=533)	T cell CD4+_EPIC	0.115739	0.0128955	0.0480721
KIRC (n=533)	T cell CD4+_TIMER	-0.0436373	0.349874	0.547585
KIRP (n=290)	T cell CD4+ (non-regulatory)_QUANTISEQ	0.0322472	0.606144	0.77774
KIRP (n=290)	T cell CD4+ (non-regulatory)_XCELL	0.00859261	0.890754	0.959288
KIRP (n=290)	T cell CD4+ central memory_XCELL	-0.157553	0.0112694	0.0438906
KIRP (n=290)	T cell CD4+ effector memory_XCELL	-0.0506266	0.418081	0.616841
KIRP (n=290)	T cell CD4+ memory activated_CIBERSORT	0.0225813	0.718104	0.858454
KIRP (n=290)	T cell CD4+ memory activated_CIBERSORT-ABS	0.0225813	0.718104	0.858454
KIRP (n=290)	T cell CD4+ memory resting_CIBERSORT	0.157665	0.0112107	0.0438906
KIRP (n=290)	T cell CD4+ memory resting_CIBERSORT-ABS	0.207266	0.00080969	0.00485814
KIRP (n=290)	T cell CD4+ memory_XCELL	0.151228	0.0150456	0.0541619
KIRP (n=290)	T cell CD4+ naive_CIBERSORT	NA	NA	NA
KIRP (n=290)	T cell CD4+ naive_CIBERSORT-ABS	NA	NA	NA
KIRP (n=290)	T cell CD4+ naive_XCELL	-0.0139911	0.823029	0.913536
KIRP (n=290)	T cell CD4+ Th1_XCELL	-0.138043	0.0266121	0.0835292
KIRP (n=290)	T cell CD4+ Th2_XCELL	0.0637059	0.308044	0.504072
KIRP (n=290)	T cell CD4+_EPIC	0.167414	0.00703753	0.0305768
KIRP (n=290)	T cell CD4+_TIMER	-0.102186	0.10149	0.238577
LGG (n=516)	T cell CD4+ (non-regulatory)_QUANTISEQ	0.168825	0.00020887	0.0015481
LGG (n=516)	T cell CD4+ (non-regulatory)_XCELL	-0.0315702	0.491081	0.68209
LGG (n=516)	T cell CD4+ central memory_XCELL	-0.112511	0.013846	0.0507148
LGG (n=516)	T cell CD4+ effector memory_XCELL	0.0654458	0.153108	0.313175
LGG (n=516)	T cell CD4+ memory activated_CIBERSORT	0.035541	0.438191	0.639029
LGG (n=516)	T cell CD4+ memory activated_CIBERSORT-ABS	0.0359133	0.433405	0.634989
LGG (n=516)	T cell CD4+ memory resting_CIBERSORT	0.10673	0.0195947	0.0670906
LGG (n=516)	T cell CD4+ memory resting_CIBERSORT-ABS	0.161163	0.000404001	0.00273678
LGG (n=516)	T cell CD4+ memory_XCELL	-0.0223956	0.625253	0.789397
LGG (n=516)	T cell CD4+ naive_CIBERSORT	0.00680661	0.882006	0.956392
LGG (n=516)	T cell CD4+ naive_CIBERSORT-ABS	0.0112652	0.805948	0.908314
LGG (n=516)	T cell CD4+ naive_XCELL	-0.0503077	0.272334	0.46496
LGG (n=516)	T cell CD4+ Th1_XCELL	0.158399	0.00050894	0.00333992
LGG (n=516)	T cell CD4+ Th2_XCELL	0.38803	1.26412e-18	1.99099e-16
LGG (n=516)	T cell CD4+_EPIC	-0.2103	3.52198e-06	3.57878e-05
LGG (n=516)	T cell CD4+_TIMER	0.288648	1.26227e-10	3.31345e-09
LIHC (n=371)	T cell CD4+ (non-regulatory)_QUANTISEQ	0.148055	0.00586521	0.0269714
LIHC (n=371)	T cell CD4+ (non-regulatory)_XCELL	-0.016115	0.765507	0.881663
LIHC (n=371)	T cell CD4+ central memory_XCELL	-0.218716	4.17732e-05	0.000350895
LIHC (n=371)	T cell CD4+ effector memory_XCELL	0.0919297	0.088207	0.211294
LIHC (n=371)	T cell CD4+ memory activated_CIBERSORT	0.123504	0.0217645	0.0733242
LIHC (n=371)	T cell CD4+ memory activated_CIBERSORT-ABS	0.126388	0.0188513	0.0648978
LIHC (n=371)	T cell CD4+ memory resting_CIBERSORT	-0.0070778	0.895784	0.95982
LIHC (n=371)	T cell CD4+ memory resting_CIBERSORT-ABS	0.142776	0.00790876	0.0336657
LIHC (n=371)	T cell CD4+ memory_XCELL	0.217687	4.54868e-05	0.000372164
LIHC (n=371)	T cell CD4+ naive_CIBERSORT	-0.0688722	0.201914	0.384308
LIHC (n=371)	T cell CD4+ naive_CIBERSORT-ABS	-0.0684475	0.204716	0.388467
LIHC (n=371)	T cell CD4+ naive_XCELL	0.0319278	0.5545	0.733311
LIHC (n=371)	T cell CD4+ Th1_XCELL	0.00170934	0.974764	0.989871
LIHC (n=371)	T cell CD4+ Th2_XCELL	0.363176	3.3954e-12	1.2583e-10
LIHC (n=371)	T cell CD4+_EPIC	0.0957895	0.0755942	0.187497
LIHC (n=371)	T cell CD4+_TIMER	0.0821234	0.127906	0.280462
LUAD (n=515)	T cell CD4+ (non-regulatory)_QUANTISEQ	-0.0670991	0.13682	0.290225
LUAD (n=515)	T cell CD4+ (non-regulatory)_XCELL	0.068753	0.127386	0.280462
LUAD (n=515)	T cell CD4+ central memory_XCELL	-0.164974	0.000234193	0.00167661
LUAD (n=515)	T cell CD4+ effector memory_XCELL	-0.0313305	0.487648	0.680343
LUAD (n=515)	T cell CD4+ memory activated_CIBERSORT	0.245499	3.35451e-08	5.71173e-07
LUAD (n=515)	T cell CD4+ memory activated_CIBERSORT-ABS	0.242229	5.15091e-08	8.53967e-07
LUAD (n=515)	T cell CD4+ memory resting_CIBERSORT	0.0167707	0.710302	0.855621
LUAD (n=515)	T cell CD4+ memory resting_CIBERSORT-ABS	0.0476567	0.290938	0.486183
LUAD (n=515)	T cell CD4+ memory_XCELL	0.219425	8.66603e-07	1.01104e-05
LUAD (n=515)	T cell CD4+ naive_CIBERSORT	-0.0558646	0.215637	0.400741
LUAD (n=515)	T cell CD4+ naive_CIBERSORT-ABS	-0.0558646	0.215637	0.400741
LUAD (n=515)	T cell CD4+ naive_XCELL	-0.0699049	0.121118	0.270583
LUAD (n=515)	T cell CD4+ Th1_XCELL	-0.0686046	0.128211	0.280462
LUAD (n=515)	T cell CD4+ Th2_XCELL	0.258627	5.63271e-09	1.14471e-07
LUAD (n=515)	T cell CD4+_EPIC	-0.0328829	0.46633	0.663178
LUAD (n=515)	T cell CD4+_TIMER	-0.062209	0.167866	0.338159
LUSC (n=501)	T cell CD4+ (non-regulatory)_QUANTISEQ	-0.040289	0.379958	0.579597
LUSC (n=501)	T cell CD4+ (non-regulatory)_XCELL	0.0677038	0.139813	0.292632
LUSC (n=501)	T cell CD4+ central memory_XCELL	-0.136524	0.002809	0.01459
LUSC (n=501)	T cell CD4+ effector memory_XCELL	-0.1131	0.0134512	0.0498484
LUSC (n=501)	T cell CD4+ memory activated_CIBERSORT	0.0698136	0.127856	0.280462
LUSC (n=501)	T cell CD4+ memory activated_CIBERSORT-ABS	0.0698336	0.127747	0.280462
LUSC (n=501)	T cell CD4+ memory resting_CIBERSORT	0.0858486	0.060999	0.157497
LUSC (n=501)	T cell CD4+ memory resting_CIBERSORT-ABS	0.0791031	0.0843817	0.204463
LUSC (n=501)	T cell CD4+ memory_XCELL	0.166904	0.000250852	0.0017757
LUSC (n=501)	T cell CD4+ naive_CIBERSORT	0.0601146	0.189972	0.368688
LUSC (n=501)	T cell CD4+ naive_CIBERSORT-ABS	0.0600842	0.190196	0.368688
LUSC (n=501)	T cell CD4+ naive_XCELL	0.00383711	0.933387	0.976494
LUSC (n=501)	T cell CD4+ Th1_XCELL	-0.0232858	0.611942	0.778835
LUSC (n=501)	T cell CD4+ Th2_XCELL	0.190502	2.81282e-05	0.00024275
LUSC (n=501)	T cell CD4+_EPIC	-0.117915	0.00995049	0.0404439
LUSC (n=501)	T cell CD4+_TIMER	-0.0680171	0.137985	0.290737
OV (n=303)	T cell CD4+ (non-regulatory)_QUANTISEQ	-0.184585	0.00346451	0.0171862
OV (n=303)	T cell CD4+ (non-regulatory)_XCELL	0.101311	0.110776	0.253777
OV (n=303)	T cell CD4+ central memory_XCELL	-0.0708498	0.26538	0.456801
OV (n=303)	T cell CD4+ effector memory_XCELL	-0.0751433	0.237426	0.432307
OV (n=303)	T cell CD4+ memory activated_CIBERSORT	-0.0197264	0.756757	0.881663
OV (n=303)	T cell CD4+ memory activated_CIBERSORT-ABS	-0.0191421	0.763746	0.881663
OV (n=303)	T cell CD4+ memory resting_CIBERSORT	-0.0142047	0.823512	0.913536
OV (n=303)	T cell CD4+ memory resting_CIBERSORT-ABS	0.0814045	0.200473	0.382722
OV (n=303)	T cell CD4+ memory_XCELL	0.125857	0.0472686	0.132352
OV (n=303)	T cell CD4+ naive_CIBERSORT	0.103431	0.103469	0.241427
OV (n=303)	T cell CD4+ naive_CIBERSORT-ABS	0.103431	0.103469	0.241427
OV (n=303)	T cell CD4+ naive_XCELL	-0.00520367	0.934885	0.976494
OV (n=303)	T cell CD4+ Th1_XCELL	-0.0443899	0.485628	0.679879
OV (n=303)	T cell CD4+ Th2_XCELL	0.276886	9.24143e-06	8.95708e-05
OV (n=303)	T cell CD4+_EPIC	-0.0725575	0.254003	0.443273
OV (n=303)	T cell CD4+_TIMER	-0.0392025	0.538073	0.729003
PRAD (n=498)	T cell CD4+ (non-regulatory)_QUANTISEQ	0.0913575	0.0626563	0.159812
PRAD (n=498)	T cell CD4+ (non-regulatory)_XCELL	-0.0610818	0.213779	0.399645
PRAD (n=498)	T cell CD4+ central memory_XCELL	-0.00148797	0.975862	0.989871
PRAD (n=498)	T cell CD4+ effector memory_XCELL	0.16589	0.000681539	0.0042095
PRAD (n=498)	T cell CD4+ memory activated_CIBERSORT	0.020256	0.680382	0.827492
PRAD (n=498)	T cell CD4+ memory activated_CIBERSORT-ABS	0.0215339	0.661432	0.818668
PRAD (n=498)	T cell CD4+ memory resting_CIBERSORT	0.14606	0.00282537	0.01459
PRAD (n=498)	T cell CD4+ memory resting_CIBERSORT-ABS	0.252563	1.78279e-07	2.44165e-06
PRAD (n=498)	T cell CD4+ memory_XCELL	0.234153	1.37418e-06	1.51883e-05
PRAD (n=498)	T cell CD4+ naive_CIBERSORT	NA	NA	NA
PRAD (n=498)	T cell CD4+ naive_CIBERSORT-ABS	NA	NA	NA
PRAD (n=498)	T cell CD4+ naive_XCELL	0.139347	0.00440663	0.0211922
PRAD (n=498)	T cell CD4+ Th1_XCELL	-0.241992	5.87542e-07	7.1183e-06
PRAD (n=498)	T cell CD4+ Th2_XCELL	0.162829	0.00085807	0.00509985
PRAD (n=498)	T cell CD4+_EPIC	0.171274	0.00045019	0.00298547
PRAD (n=498)	T cell CD4+_TIMER	0.176235	0.00030386	0.00208078
SKCM (n=471)	T cell CD4+ (non-regulatory)_QUANTISEQ	-0.169221	0.000279216	0.00195451
SKCM (n=471)	T cell CD4+ (non-regulatory)_XCELL	0.0605057	0.196667	0.376596
SKCM (n=471)	T cell CD4+ central memory_XCELL	-0.132311	0.00460829	0.0219941
SKCM (n=471)	T cell CD4+ effector memory_XCELL	0.00623025	0.894332	0.95982
SKCM (n=471)	T cell CD4+ memory activated_CIBERSORT	0.142375	0.00228188	0.0121829
SKCM (n=471)	T cell CD4+ memory activated_CIBERSORT-ABS	0.156834	0.000767146	0.00464714
SKCM (n=471)	T cell CD4+ memory resting_CIBERSORT	0.230128	6.59254e-07	7.83641e-06
SKCM (n=471)	T cell CD4+ memory resting_CIBERSORT-ABS	0.279811	1.14821e-09	2.78221e-08
SKCM (n=471)	T cell CD4+ memory_XCELL	0.520693	4.0521e-33	2.55282e-30
SKCM (n=471)	T cell CD4+ naive_CIBERSORT	-0.0893686	0.0562529	0.150133
SKCM (n=471)	T cell CD4+ naive_CIBERSORT-ABS	-0.0875296	0.0615347	0.158091
SKCM (n=471)	T cell CD4+ naive_XCELL	-0.126546	0.00675412	0.0303077
SKCM (n=471)	T cell CD4+ Th1_XCELL	-0.379372	4.31339e-17	4.52906e-15
SKCM (n=471)	T cell CD4+ Th2_XCELL	0.418877	7.66772e-21	1.61022e-18
SKCM (n=471)	T cell CD4+_EPIC	0.260247	1.64431e-08	2.87754e-07
SKCM (n=471)	T cell CD4+_TIMER	0.0395455	0.399005	0.599935
SKCM-Metastasis (n=368)	T cell CD4+ (non-regulatory)_QUANTISEQ	-0.153608	0.00376631	0.0185373
SKCM-Metastasis (n=368)	T cell CD4+ (non-regulatory)_XCELL	0.085901	0.106639	0.246995
SKCM-Metastasis (n=368)	T cell CD4+ central memory_XCELL	-0.0959407	0.0714056	0.178306
SKCM-Metastasis (n=368)	T cell CD4+ effector memory_XCELL	0.0282927	0.595733	0.769657
SKCM-Metastasis (n=368)	T cell CD4+ memory activated_CIBERSORT	0.11994	0.0240188	0.0787306
SKCM-Metastasis (n=368)	T cell CD4+ memory activated_CIBERSORT-ABS	0.130831	0.0137599	0.0506945
SKCM-Metastasis (n=368)	T cell CD4+ memory resting_CIBERSORT	0.254834	1.18482e-06	1.33292e-05
SKCM-Metastasis (n=368)	T cell CD4+ memory resting_CIBERSORT-ABS	0.296283	1.32412e-08	2.38342e-07
SKCM-Metastasis (n=368)	T cell CD4+ memory_XCELL	0.432098	1.55219e-17	1.95576e-15
SKCM-Metastasis (n=368)	T cell CD4+ naive_CIBERSORT	-0.105002	0.0483734	0.133663
SKCM-Metastasis (n=368)	T cell CD4+ naive_CIBERSORT-ABS	-0.103418	0.0518793	0.142104
SKCM-Metastasis (n=368)	T cell CD4+ naive_XCELL	-0.170917	0.00124573	0.00720008
SKCM-Metastasis (n=368)	T cell CD4+ Th1_XCELL	-0.351463	9.91325e-12	3.46964e-10
SKCM-Metastasis (n=368)	T cell CD4+ Th2_XCELL	0.344136	2.80662e-11	9.30616e-10
SKCM-Metastasis (n=368)	T cell CD4+_EPIC	0.251974	1.57259e-06	1.67921e-05
SKCM-Metastasis (n=368)	T cell CD4+_TIMER	0.00698337	0.895832	0.95982
SKCM-Primary (n=103)	T cell CD4+ (non-regulatory)_QUANTISEQ	-0.0711399	0.477379	0.672816
SKCM-Primary (n=103)	T cell CD4+ (non-regulatory)_XCELL	-0.0997279	0.31863	0.517363
SKCM-Primary (n=103)	T cell CD4+ central memory_XCELL	-0.189474	0.0564786	0.150133
SKCM-Primary (n=103)	T cell CD4+ effector memory_XCELL	-0.000531004	0.995774	0.999579
SKCM-Primary (n=103)	T cell CD4+ memory activated_CIBERSORT	0.138838	0.164026	0.332271
SKCM-Primary (n=103)	T cell CD4+ memory activated_CIBERSORT-ABS	0.147942	0.137835	0.290737
SKCM-Primary (n=103)	T cell CD4+ memory resting_CIBERSORT	0.130293	0.191808	0.369539
SKCM-Primary (n=103)	T cell CD4+ memory resting_CIBERSORT-ABS	0.158433	0.111736	0.25505
SKCM-Primary (n=103)	T cell CD4+ memory_XCELL	0.670956	1.20247e-14	6.31298e-13
SKCM-Primary (n=103)	T cell CD4+ naive_CIBERSORT	-0.0424302	0.671979	0.823632
SKCM-Primary (n=103)	T cell CD4+ naive_CIBERSORT-ABS	-0.0417435	0.67699	0.826558
SKCM-Primary (n=103)	T cell CD4+ naive_XCELL	-0.14843	0.136526	0.290225
SKCM-Primary (n=103)	T cell CD4+ Th1_XCELL	-0.475612	4.37855e-07	5.55705e-06
SKCM-Primary (n=103)	T cell CD4+ Th2_XCELL	0.562604	7.55242e-10	1.90321e-08
SKCM-Primary (n=103)	T cell CD4+_EPIC	0.289083	0.00321081	0.0161825
SKCM-Primary (n=103)	T cell CD4+_TIMER	-0.0587775	0.557328	0.734553
STAD (n=415)	T cell CD4+ (non-regulatory)_QUANTISEQ	-0.132991	0.00954133	0.0390327
STAD (n=415)	T cell CD4+ (non-regulatory)_XCELL	0.0521116	0.311614	0.507279
STAD (n=415)	T cell CD4+ central memory_XCELL	0.0400275	0.437165	0.639012
STAD (n=415)	T cell CD4+ effector memory_XCELL	-0.0272753	0.596571	0.769657
STAD (n=415)	T cell CD4+ memory activated_CIBERSORT	0.135824	0.00810277	0.03426
STAD (n=415)	T cell CD4+ memory activated_CIBERSORT-ABS	0.135156	0.00842313	0.0351429
STAD (n=415)	T cell CD4+ memory resting_CIBERSORT	0.0359858	0.484877	0.679879
STAD (n=415)	T cell CD4+ memory resting_CIBERSORT-ABS	0.0319193	0.535581	0.72719
STAD (n=415)	T cell CD4+ memory_XCELL	0.20251	7.16766e-05	0.000571598
STAD (n=415)	T cell CD4+ naive_CIBERSORT	0.03086	0.549214	0.729481
STAD (n=415)	T cell CD4+ naive_CIBERSORT-ABS	0.03086	0.549214	0.729481
STAD (n=415)	T cell CD4+ naive_XCELL	-0.191899	0.000170922	0.00131318
STAD (n=415)	T cell CD4+ Th1_XCELL	-0.0960596	0.0617307	0.158091
STAD (n=415)	T cell CD4+ Th2_XCELL	0.191464	0.000176953	0.00134313
STAD (n=415)	T cell CD4+_EPIC	0.150487	0.00331699	0.0165849
STAD (n=415)	T cell CD4+_TIMER	-0.10637	0.038467	0.110155
TGCT (n=150)	T cell CD4+ (non-regulatory)_QUANTISEQ	-0.132668	0.109185	0.251388
TGCT (n=150)	T cell CD4+ (non-regulatory)_XCELL	0.0681242	0.412293	0.60973
TGCT (n=150)	T cell CD4+ central memory_XCELL	-0.262153	0.00133851	0.00759693
TGCT (n=150)	T cell CD4+ effector memory_XCELL	0.112323	0.175572	0.347832
TGCT (n=150)	T cell CD4+ memory activated_CIBERSORT	0.0339765	0.682874	0.82816
TGCT (n=150)	T cell CD4+ memory activated_CIBERSORT-ABS	0.0432756	0.602748	0.774961
TGCT (n=150)	T cell CD4+ memory resting_CIBERSORT	0.256258	0.00173071	0.00948129
TGCT (n=150)	T cell CD4+ memory resting_CIBERSORT-ABS	0.282296	0.000531876	0.00345446
TGCT (n=150)	T cell CD4+ memory_XCELL	0.245553	0.00271943	0.014277
TGCT (n=150)	T cell CD4+ naive_CIBERSORT	0.122703	0.138716	0.291303
TGCT (n=150)	T cell CD4+ naive_CIBERSORT-ABS	0.124293	0.133632	0.286354
TGCT (n=150)	T cell CD4+ naive_XCELL	0.113686	0.170359	0.341802
TGCT (n=150)	T cell CD4+ Th1_XCELL	-0.0697684	0.401077	0.601615
TGCT (n=150)	T cell CD4+ Th2_XCELL	0.170928	0.0384561	0.110155
TGCT (n=150)	T cell CD4+_EPIC	0.208229	0.0113773	0.0438906
TGCT (n=150)	T cell CD4+_TIMER	0.0116167	0.888939	0.959288
THCA (n=509)	T cell CD4+ (non-regulatory)_QUANTISEQ	-0.226228	4.41036e-07	5.55705e-06
THCA (n=509)	T cell CD4+ (non-regulatory)_XCELL	-0.0184974	0.683561	0.82816
THCA (n=509)	T cell CD4+ central memory_XCELL	-0.265924	2.41421e-09	5.43198e-08
THCA (n=509)	T cell CD4+ effector memory_XCELL	0.00359808	0.936809	0.976494
THCA (n=509)	T cell CD4+ memory activated_CIBERSORT	0.0942324	0.037438	0.109702
THCA (n=509)	T cell CD4+ memory activated_CIBERSORT-ABS	0.0944012	0.0370964	0.109209
THCA (n=509)	T cell CD4+ memory resting_CIBERSORT	0.130528	0.00387163	0.018908
THCA (n=509)	T cell CD4+ memory resting_CIBERSORT-ABS	0.293484	3.77097e-11	1.11666e-09
THCA (n=509)	T cell CD4+ memory_XCELL	0.253732	1.31549e-08	2.38342e-07
THCA (n=509)	T cell CD4+ naive_CIBERSORT	-0.0854693	0.0592021	0.154121
THCA (n=509)	T cell CD4+ naive_CIBERSORT-ABS	-0.0857165	0.0584686	0.15372
THCA (n=509)	T cell CD4+ naive_XCELL	0.0687929	0.129119	0.280509
THCA (n=509)	T cell CD4+ Th1_XCELL	-0.227341	3.85744e-07	5.17062e-06
THCA (n=509)	T cell CD4+ Th2_XCELL	0.294504	3.20384e-11	1.00921e-09
THCA (n=509)	T cell CD4+_EPIC	0.266994	2.07163e-09	4.83379e-08
THCA (n=509)	T cell CD4+_TIMER	0.0615706	0.174483	0.347832
THYM (n=120)	T cell CD4+ (non-regulatory)_QUANTISEQ	-0.0982231	0.296325	0.492357
THYM (n=120)	T cell CD4+ (non-regulatory)_XCELL	0.596746	1.95013e-12	8.77561e-11
THYM (n=120)	T cell CD4+ central memory_XCELL	-0.0170549	0.856439	0.933489
THYM (n=120)	T cell CD4+ effector memory_XCELL	0.469746	1.18208e-07	1.77312e-06
THYM (n=120)	T cell CD4+ memory activated_CIBERSORT	-0.0671808	0.475617	0.671835
THYM (n=120)	T cell CD4+ memory activated_CIBERSORT-ABS	-0.0576612	0.54047	0.729481
THYM (n=120)	T cell CD4+ memory resting_CIBERSORT	0.183344	0.0498413	0.137118
THYM (n=120)	T cell CD4+ memory resting_CIBERSORT-ABS	0.142084	0.129841	0.280696
THYM (n=120)	T cell CD4+ memory_XCELL	0.567124	3.89946e-11	1.11666e-09
THYM (n=120)	T cell CD4+ naive_CIBERSORT	0.380707	2.7022e-05	0.000236442
THYM (n=120)	T cell CD4+ naive_CIBERSORT-ABS	0.390948	1.5612e-05	0.000144641
THYM (n=120)	T cell CD4+ naive_XCELL	0.347506	0.000141706	0.00110216
THYM (n=120)	T cell CD4+ Th1_XCELL	-0.00552748	0.953248	0.982324
THYM (n=120)	T cell CD4+ Th2_XCELL	0.466896	1.44215e-07	2.01901e-06
THYM (n=120)	T cell CD4+_EPIC	-0.316848	0.000560519	0.00356694
THYM (n=120)	T cell CD4+_TIMER	0.25985	0.00503978	0.0238468
UCEC (n=545)	T cell CD4+ (non-regulatory)_QUANTISEQ	0.285634	0.00698372	0.0305768
UCEC (n=545)	T cell CD4+ (non-regulatory)_XCELL	-0.0169149	0.875703	0.951195
UCEC (n=545)	T cell CD4+ central memory_XCELL	-0.0042091	0.968954	0.987768
UCEC (n=545)	T cell CD4+ effector memory_XCELL	-0.211362	0.0480649	0.133519
UCEC (n=545)	T cell CD4+ memory activated_CIBERSORT	-0.0053045	0.96088	0.985919
UCEC (n=545)	T cell CD4+ memory activated_CIBERSORT-ABS	-0.0064273	0.952608	0.982324
UCEC (n=545)	T cell CD4+ memory resting_CIBERSORT	-0.0047329	0.965093	0.986936
UCEC (n=545)	T cell CD4+ memory resting_CIBERSORT-ABS	0.031554	0.770407	0.885687
UCEC (n=545)	T cell CD4+ memory_XCELL	0.257908	0.0152665	0.0543383
UCEC (n=545)	T cell CD4+ naive_CIBERSORT	0.0402279	0.709799	0.855621
UCEC (n=545)	T cell CD4+ naive_CIBERSORT-ABS	0.0433791	0.688198	0.832178
UCEC (n=545)	T cell CD4+ naive_XCELL	-0.267694	0.0116862	0.0440856
UCEC (n=545)	T cell CD4+ Th1_XCELL	-0.189506	0.0770001	0.189492
UCEC (n=545)	T cell CD4+ Th2_XCELL	0.242514	0.0228131	0.0756435
UCEC (n=545)	T cell CD4+_EPIC	0.152735	0.155419	0.316875
UCEC (n=545)	T cell CD4+_TIMER	-0.0952413	0.377411	0.578475
UCS (n=57)	T cell CD4+ (non-regulatory)_QUANTISEQ	-0.213532	0.124726	0.277659
UCS (n=57)	T cell CD4+ (non-regulatory)_XCELL	-0.00885505	0.949822	0.982324
UCS (n=57)	T cell CD4+ central memory_XCELL	-0.0446091	0.751112	0.881663
UCS (n=57)	T cell CD4+ effector memory_XCELL	0.0845038	0.547437	0.729481
UCS (n=57)	T cell CD4+ memory activated_CIBERSORT	-0.162315	0.245556	0.436381
UCS (n=57)	T cell CD4+ memory activated_CIBERSORT-ABS	-0.162315	0.245556	0.436381
UCS (n=57)	T cell CD4+ memory resting_CIBERSORT	-0.136284	0.330526	0.530843
UCS (n=57)	T cell CD4+ memory resting_CIBERSORT-ABS	-0.0662267	0.637527	0.798494
UCS (n=57)	T cell CD4+ memory_XCELL	-0.364291	0.00732553	0.0316102
UCS (n=57)	T cell CD4+ naive_CIBERSORT	-0.107321	0.444336	0.642134
UCS (n=57)	T cell CD4+ naive_CIBERSORT-ABS	-0.107321	0.444336	0.642134
UCS (n=57)	T cell CD4+ naive_XCELL	0.00395479	0.977579	0.989871
UCS (n=57)	T cell CD4+ Th1_XCELL	-0.036541	0.795045	0.902483
UCS (n=57)	T cell CD4+ Th2_XCELL	0.0119985	0.932046	0.976494
UCS (n=57)	T cell CD4+_EPIC	-0.0809937	0.564256	0.742133
UCS (n=57)	T cell CD4+_TIMER	-0.186155	0.182003	0.358318
ACC (n=79)	T cell CD8+ central memory_XCELL	-0.0595864	0.616537	0.811267
ACC (n=79)	T cell CD8+ effector memory_XCELL	0.0103268	0.930901	0.965892
ACC (n=79)	T cell CD8+ naive_XCELL	0.0838233	0.480768	0.733997
ACC (n=79)	T cell CD8+_CIBERSORT	-0.142024	0.230686	0.489807
ACC (n=79)	T cell CD8+_CIBERSORT-ABS	-0.0564032	0.635522	0.822682
ACC (n=79)	T cell CD8+_EPIC	-0.00392852	0.973686	0.981044
ACC (n=79)	T cell CD8+_MCPCOUNTER	-0.0979004	0.409936	0.667846
ACC (n=79)	T cell CD8+_QUANTISEQ	-0.118798	0.316807	0.589408
ACC (n=79)	T cell CD8+_TIMER	0.345929	0.00271989	0.0271989
ACC (n=79)	T cell CD8+_XCELL	0.129601	0.274473	0.548947
BLCA (n=408)	T cell CD8+ central memory_XCELL	0.103499	0.0472523	0.192867
BLCA (n=408)	T cell CD8+ effector memory_XCELL	0.0837343	0.10879	0.327188
BLCA (n=408)	T cell CD8+ naive_XCELL	-0.033822	0.517764	0.750382
BLCA (n=408)	T cell CD8+_CIBERSORT	-0.0528721	0.311768	0.589408
BLCA (n=408)	T cell CD8+_CIBERSORT-ABS	0.0557476	0.286146	0.562008
BLCA (n=408)	T cell CD8+_EPIC	-0.146034	0.00500133	0.0377459
BLCA (n=408)	T cell CD8+_MCPCOUNTER	0.119143	0.022258	0.108576
BLCA (n=408)	T cell CD8+_QUANTISEQ	0.118203	0.0233428	0.109892
BLCA (n=408)	T cell CD8+_TIMER	0.320152	3.24e-10	2.16e-08
BLCA (n=408)	T cell CD8+_XCELL	-0.0161243	0.757865	0.896882
BRCA (n=1100)	T cell CD8+ central memory_XCELL	0.0203613	0.521389	0.752908
BRCA (n=1100)	T cell CD8+ effector memory_XCELL	-0.0874797	0.0057826	0.0413043
BRCA (n=1100)	T cell CD8+ naive_XCELL	0.0373018	0.240005	0.489807
BRCA (n=1100)	T cell CD8+_CIBERSORT	-0.151342	1.64e-06	3.86e-05
BRCA (n=1100)	T cell CD8+_CIBERSORT-ABS	-0.0639718	0.0437566	0.184238
BRCA (n=1100)	T cell CD8+_EPIC	0.0373097	0.239907	0.489807
BRCA (n=1100)	T cell CD8+_MCPCOUNTER	-0.0436723	0.168879	0.409404
BRCA (n=1100)	T cell CD8+_QUANTISEQ	-0.0194027	0.541192	0.767648
BRCA (n=1100)	T cell CD8+_TIMER	0.223527	1.01e-12	2.02e-10
BRCA (n=1100)	T cell CD8+_XCELL	-0.0270073	0.395012	0.658354
BRCA-Basal (n=191)	T cell CD8+ central memory_XCELL	0.0377828	0.620619	0.811267
BRCA-Basal (n=191)	T cell CD8+ effector memory_XCELL	-0.0248169	0.745145	0.887077
BRCA-Basal (n=191)	T cell CD8+ naive_XCELL	0.0818492	0.282963	0.560324
BRCA-Basal (n=191)	T cell CD8+_CIBERSORT	-0.1689	0.025886	0.1204
BRCA-Basal (n=191)	T cell CD8+_CIBERSORT-ABS	-0.061688	0.41873	0.675287
BRCA-Basal (n=191)	T cell CD8+_EPIC	0.0965055	0.205235	0.461201
BRCA-Basal (n=191)	T cell CD8+_MCPCOUNTER	0.0443171	0.561473	0.779824
BRCA-Basal (n=191)	T cell CD8+_QUANTISEQ	0.0471841	0.536404	0.76464
BRCA-Basal (n=191)	T cell CD8+_TIMER	0.165165	0.0294094	0.132177
BRCA-Basal (n=191)	T cell CD8+_XCELL	0.0227516	0.765711	0.89975
BRCA-Her2 (n=82)	T cell CD8+ central memory_XCELL	-0.234884	0.0470274	0.192867
BRCA-Her2 (n=82)	T cell CD8+ effector memory_XCELL	-0.0317288	0.791331	0.900003
BRCA-Her2 (n=82)	T cell CD8+ naive_XCELL	-0.00892015	0.940719	0.971412
BRCA-Her2 (n=82)	T cell CD8+_CIBERSORT	-0.142605	0.232092	0.489807
BRCA-Her2 (n=82)	T cell CD8+_CIBERSORT-ABS	-0.20368	0.0861491	0.2779
BRCA-Her2 (n=82)	T cell CD8+_EPIC	0.025908	0.828968	0.923641
BRCA-Her2 (n=82)	T cell CD8+_MCPCOUNTER	-0.177469	0.135859	0.3827
BRCA-Her2 (n=82)	T cell CD8+_QUANTISEQ	-0.205603	0.0831608	0.272658
BRCA-Her2 (n=82)	T cell CD8+_TIMER	0.0154488	0.897515	0.947565
BRCA-Her2 (n=82)	T cell CD8+_XCELL	-0.184639	0.1205	0.354411
BRCA-LumA (n=568)	T cell CD8+ central memory_XCELL	0.0352635	0.423644	0.67783
BRCA-LumA (n=568)	T cell CD8+ effector memory_XCELL	-0.0959774	0.0291055	0.132177
BRCA-LumA (n=568)	T cell CD8+ naive_XCELL	0.075267	0.0873255	0.279442
BRCA-LumA (n=568)	T cell CD8+_CIBERSORT	-0.175614	5.95e-05	0.000915999
BRCA-LumA (n=568)	T cell CD8+_CIBERSORT-ABS	-0.0427474	0.332014	0.606419
BRCA-LumA (n=568)	T cell CD8+_EPIC	0.0187997	0.66977	0.839837
BRCA-LumA (n=568)	T cell CD8+_MCPCOUNTER	-0.00412983	0.925367	0.965289
BRCA-LumA (n=568)	T cell CD8+_QUANTISEQ	0.013413	0.760933	0.897856
BRCA-LumA (n=568)	T cell CD8+_TIMER	0.253273	5.21e-09	2.08e-07
BRCA-LumA (n=568)	T cell CD8+_XCELL	-0.0253162	0.565745	0.780604
BRCA-LumB (n=219)	T cell CD8+ central memory_XCELL	0.0395847	0.585662	0.791435
BRCA-LumB (n=219)	T cell CD8+ effector memory_XCELL	-0.0693982	0.338828	0.613263
BRCA-LumB (n=219)	T cell CD8+ naive_XCELL	-0.138121	0.0560646	0.208963
BRCA-LumB (n=219)	T cell CD8+_CIBERSORT	-0.037702	0.60363	0.802166
BRCA-LumB (n=219)	T cell CD8+_CIBERSORT-ABS	0.00521267	0.942795	0.971412
BRCA-LumB (n=219)	T cell CD8+_EPIC	0.0610286	0.400404	0.659102
BRCA-LumB (n=219)	T cell CD8+_MCPCOUNTER	0.00619061	0.932086	0.965892
BRCA-LumB (n=219)	T cell CD8+_QUANTISEQ	-0.0282957	0.696836	0.857645
BRCA-LumB (n=219)	T cell CD8+_TIMER	0.136798	0.058484	0.21462
BRCA-LumB (n=219)	T cell CD8+_XCELL	-0.0133699	0.853968	0.932344
COAD (n=458)	T cell CD8+ central memory_XCELL	-0.00269193	0.964556	0.979244
COAD (n=458)	T cell CD8+ effector memory_XCELL	-0.0228239	0.70631	0.863988
COAD (n=458)	T cell CD8+ naive_XCELL	0.0200815	0.740244	0.885319
COAD (n=458)	T cell CD8+_CIBERSORT	-0.117538	0.0515316	0.200123
COAD (n=458)	T cell CD8+_CIBERSORT-ABS	-0.0608238	0.314904	0.589408
COAD (n=458)	T cell CD8+_EPIC	-0.0920452	0.127839	0.365255
COAD (n=458)	T cell CD8+_MCPCOUNTER	-0.0790251	0.191363	0.450265
COAD (n=458)	T cell CD8+_QUANTISEQ	-0.0347641	0.565938	0.780604
COAD (n=458)	T cell CD8+_TIMER	0.0276895	0.647545	0.827534
COAD (n=458)	T cell CD8+_XCELL	0.0768268	0.204048	0.461201
DLBC (n=48)	T cell CD8+ central memory_XCELL	-0.0639686	0.691117	0.855873
DLBC (n=48)	T cell CD8+ effector memory_XCELL	-0.0900936	0.575355	0.78566
DLBC (n=48)	T cell CD8+ naive_XCELL	-0.0629562	0.695769	0.857645
DLBC (n=48)	T cell CD8+_CIBERSORT	-0.169973	0.288029	0.562008
DLBC (n=48)	T cell CD8+_CIBERSORT-ABS	0.005791	0.971335	0.981044
DLBC (n=48)	T cell CD8+_EPIC	0.106168	0.508832	0.744278
DLBC (n=48)	T cell CD8+_MCPCOUNTER	0.0210579	0.896028	0.947565
DLBC (n=48)	T cell CD8+_QUANTISEQ	0.0454808	0.777668	0.900003
DLBC (n=48)	T cell CD8+_TIMER	0.00816815	0.959577	0.979244
DLBC (n=48)	T cell CD8+_XCELL	-0.224034	0.159093	0.391112
ESCA (n=185)	T cell CD8+ central memory_XCELL	0.126798	0.0898527	0.283001
ESCA (n=185)	T cell CD8+ effector memory_XCELL	0.0247601	0.741455	0.885319
ESCA (n=185)	T cell CD8+ naive_XCELL	-0.013675	0.855426	0.932344
ESCA (n=185)	T cell CD8+_CIBERSORT	-0.0372613	0.619469	0.811267
ESCA (n=185)	T cell CD8+_CIBERSORT-ABS	-0.0379511	0.612995	0.811267
ESCA (n=185)	T cell CD8+_EPIC	-0.113982	0.127623	0.365255
ESCA (n=185)	T cell CD8+_MCPCOUNTER	-0.0222331	0.767042	0.89975
ESCA (n=185)	T cell CD8+_QUANTISEQ	0.00401149	0.957377	0.979244
ESCA (n=185)	T cell CD8+_TIMER	0.0494241	0.509974	0.744278
ESCA (n=185)	T cell CD8+_XCELL	-0.0896697	0.231276	0.489807
GBM (n=153)	T cell CD8+ central memory_XCELL	0.247854	0.0034982	0.0318019
GBM (n=153)	T cell CD8+ effector memory_XCELL	0.126213	0.14166	0.384003
GBM (n=153)	T cell CD8+ naive_XCELL	0.0379021	0.660136	0.835615
GBM (n=153)	T cell CD8+_CIBERSORT	0.045215	0.599828	0.800509
GBM (n=153)	T cell CD8+_CIBERSORT-ABS	0.076499	0.374274	0.648093
GBM (n=153)	T cell CD8+_EPIC	0.251549	0.0030253	0.0288124
GBM (n=153)	T cell CD8+_MCPCOUNTER	0.0915094	0.287551	0.562008
GBM (n=153)	T cell CD8+_QUANTISEQ	0.0401033	0.641729	0.827452
GBM (n=153)	T cell CD8+_TIMER	0.244103	0.00404546	0.0323637
GBM (n=153)	T cell CD8+_XCELL	0.0451465	0.600382	0.800509
HNSC (n=522)	T cell CD8+ central memory_XCELL	0.115345	0.0104517	0.064318
HNSC (n=522)	T cell CD8+ effector memory_XCELL	0.0891556	0.0481012	0.194348
HNSC (n=522)	T cell CD8+ naive_XCELL	0.118886	0.00829859	0.054417
HNSC (n=522)	T cell CD8+_CIBERSORT	0.0220424	0.625734	0.815094
HNSC (n=522)	T cell CD8+_CIBERSORT-ABS	0.0918786	0.0416407	0.177194
HNSC (n=522)	T cell CD8+_EPIC	-0.11502	0.0106721	0.0646793
HNSC (n=522)	T cell CD8+_MCPCOUNTER	0.120453	0.00747887	0.0507042
HNSC (n=522)	T cell CD8+_QUANTISEQ	0.115528	0.0103295	0.064318
HNSC (n=522)	T cell CD8+_TIMER	0.0164906	0.715206	0.864297
HNSC (n=522)	T cell CD8+_XCELL	0.0881545	0.0506784	0.198739
HNSC-HPV- (n=422)	T cell CD8+ central memory_XCELL	0.0147107	0.769287	0.89975
HNSC-HPV- (n=422)	T cell CD8+ effector memory_XCELL	0.0448877	0.370575	0.647293
HNSC-HPV- (n=422)	T cell CD8+ naive_XCELL	0.148185	0.00296986	0.0288124
HNSC-HPV- (n=422)	T cell CD8+_CIBERSORT	-0.0745176	0.136815	0.3827
HNSC-HPV- (n=422)	T cell CD8+_CIBERSORT-ABS	-0.00930822	0.852769	0.932344
HNSC-HPV- (n=422)	T cell CD8+_EPIC	-0.230798	3.09e-06	6.18e-05
HNSC-HPV- (n=422)	T cell CD8+_MCPCOUNTER	0.0123498	0.805502	0.911588
HNSC-HPV- (n=422)	T cell CD8+_QUANTISEQ	0.0231008	0.645063	0.827452
HNSC-HPV- (n=422)	T cell CD8+_TIMER	0.0725926	0.147276	0.387502
HNSC-HPV- (n=422)	T cell CD8+_XCELL	0.00950027	0.849768	0.932344
HNSC-HPV+ (n=98)	T cell CD8+ central memory_XCELL	0.246578	0.0198369	0.10044
HNSC-HPV+ (n=98)	T cell CD8+ effector memory_XCELL	0.157351	0.140844	0.384003
HNSC-HPV+ (n=98)	T cell CD8+ naive_XCELL	-0.070548	0.511207	0.744278
HNSC-HPV+ (n=98)	T cell CD8+_CIBERSORT	0.156293	0.143569	0.385419
HNSC-HPV+ (n=98)	T cell CD8+_CIBERSORT-ABS	0.208448	0.0499624	0.197871
HNSC-HPV+ (n=98)	T cell CD8+_EPIC	0.186807	0.0796215	0.263212
HNSC-HPV+ (n=98)	T cell CD8+_MCPCOUNTER	0.223057	0.0356306	0.156618
HNSC-HPV+ (n=98)	T cell CD8+_QUANTISEQ	0.204649	0.0543829	0.207173
HNSC-HPV+ (n=98)	T cell CD8+_TIMER	-0.0429308	0.689549	0.855873
HNSC-HPV+ (n=98)	T cell CD8+_XCELL	0.175371	0.100213	0.308349
KICH (n=66)	T cell CD8+ central memory_XCELL	0.0193931	0.878136	0.946777
KICH (n=66)	T cell CD8+ effector memory_XCELL	-0.168205	0.180452	0.432221
KICH (n=66)	T cell CD8+ naive_XCELL	-0.231041	0.0640672	0.226787
KICH (n=66)	T cell CD8+_CIBERSORT	-0.225901	0.0703891	0.244832
KICH (n=66)	T cell CD8+_CIBERSORT-ABS	-0.0237731	0.850898	0.932344
KICH (n=66)	T cell CD8+_EPIC	0.466847	8.85e-05	0.00126426
KICH (n=66)	T cell CD8+_MCPCOUNTER	0.0612991	0.627622	0.815094
KICH (n=66)	T cell CD8+_QUANTISEQ	0.0851041	0.500284	0.741162
KICH (n=66)	T cell CD8+_TIMER	0.418979	0.000513401	0.00622304
KICH (n=66)	T cell CD8+_XCELL	0.267466	0.0312441	0.138863
KIRC (n=533)	T cell CD8+ central memory_XCELL	0.123935	0.00772044	0.0514696
KIRC (n=533)	T cell CD8+ effector memory_XCELL	-0.0134774	0.772888	0.900003
KIRC (n=533)	T cell CD8+ naive_XCELL	-0.0154529	0.740716	0.885319
KIRC (n=533)	T cell CD8+_CIBERSORT	0.00905662	0.846231	0.932344
KIRC (n=533)	T cell CD8+_CIBERSORT-ABS	0.0889194	0.0564199	0.208963
KIRC (n=533)	T cell CD8+_EPIC	0.270602	3.53e-09	1.57e-07
KIRC (n=533)	T cell CD8+_MCPCOUNTER	0.134587	0.0037911	0.0323637
KIRC (n=533)	T cell CD8+_QUANTISEQ	0.0818223	0.0792639	0.263212
KIRC (n=533)	T cell CD8+_TIMER	0.115077	0.013424	0.0767085
KIRC (n=533)	T cell CD8+_XCELL	0.0903556	0.0525357	0.20206
KIRP (n=290)	T cell CD8+ central memory_XCELL	-0.0890544	0.153777	0.391112
KIRP (n=290)	T cell CD8+ effector memory_XCELL	-0.0427306	0.494396	0.737729
KIRP (n=290)	T cell CD8+ naive_XCELL	-0.111173	0.074657	0.255238
KIRP (n=290)	T cell CD8+_CIBERSORT	-0.129608	0.0374816	0.162963
KIRP (n=290)	T cell CD8+_CIBERSORT-ABS	0.0149345	0.811313	0.911588
KIRP (n=290)	T cell CD8+_EPIC	0.267447	1.33e-05	0.000242435
KIRP (n=290)	T cell CD8+_MCPCOUNTER	-0.0527734	0.398592	0.659102
KIRP (n=290)	T cell CD8+_QUANTISEQ	-0.0629904	0.31352	0.589408
KIRP (n=290)	T cell CD8+_TIMER	0.227897	0.000222943	0.00297257
KIRP (n=290)	T cell CD8+_XCELL	0.0109961	0.860473	0.935297
LGG (n=516)	T cell CD8+ central memory_XCELL	-0.0270336	0.555458	0.775308
LGG (n=516)	T cell CD8+ effector memory_XCELL	-0.0913559	0.0459035	0.191265
LGG (n=516)	T cell CD8+ naive_XCELL	-0.00611976	0.893839	0.947565
LGG (n=516)	T cell CD8+_CIBERSORT	-0.0410587	0.370412	0.647293
LGG (n=516)	T cell CD8+_CIBERSORT-ABS	0.00106611	0.981453	0.986385
LGG (n=516)	T cell CD8+_EPIC	-0.179725	7.77e-05	0.00115154
LGG (n=516)	T cell CD8+_MCPCOUNTER	-0.0786716	0.085765	0.2779
LGG (n=516)	T cell CD8+_QUANTISEQ	0.0420684	0.358751	0.635765
LGG (n=516)	T cell CD8+_TIMER	-0.24112	9.46e-08	2.7e-06
LGG (n=516)	T cell CD8+_XCELL	0.0391854	0.392659	0.65717
LIHC (n=371)	T cell CD8+ central memory_XCELL	-0.0182782	0.735139	0.885319
LIHC (n=371)	T cell CD8+ effector memory_XCELL	-0.00717522	0.894358	0.947565
LIHC (n=371)	T cell CD8+ naive_XCELL	-0.155014	0.00389838	0.0323637
LIHC (n=371)	T cell CD8+_CIBERSORT	-0.030251	0.575496	0.78566
LIHC (n=371)	T cell CD8+_CIBERSORT-ABS	0.129951	0.0157254	0.0876849
LIHC (n=371)	T cell CD8+_EPIC	-0.0374612	0.487978	0.737729
LIHC (n=371)	T cell CD8+_MCPCOUNTER	0.157719	0.00331109	0.0308008
LIHC (n=371)	T cell CD8+_QUANTISEQ	0.254049	1.75e-06	3.89e-05
LIHC (n=371)	T cell CD8+_TIMER	0.152811	0.00444442	0.0341879
LIHC (n=371)	T cell CD8+_XCELL	0.0393459	0.46634	0.723008
LUAD (n=515)	T cell CD8+ central memory_XCELL	0.0585846	0.19408	0.45135
LUAD (n=515)	T cell CD8+ effector memory_XCELL	-0.0181123	0.688295	0.855873
LUAD (n=515)	T cell CD8+ naive_XCELL	0.139465	0.00190953	0.0206436
LUAD (n=515)	T cell CD8+_CIBERSORT	-0.0641401	0.155029	0.391112
LUAD (n=515)	T cell CD8+_CIBERSORT-ABS	0.0121933	0.787116	0.900003
LUAD (n=515)	T cell CD8+_EPIC	-0.21081	2.33e-06	4.92e-05
LUAD (n=515)	T cell CD8+_MCPCOUNTER	0.05364	0.234505	0.489807
LUAD (n=515)	T cell CD8+_QUANTISEQ	0.0590311	0.190698	0.450265
LUAD (n=515)	T cell CD8+_TIMER	0.151867	0.00071676	0.00843247
LUAD (n=515)	T cell CD8+_XCELL	-0.035964	0.42559	0.678231
LUSC (n=501)	T cell CD8+ central memory_XCELL	0.0648876	0.157086	0.391112
LUSC (n=501)	T cell CD8+ effector memory_XCELL	0.0474729	0.300816	0.575724
LUSC (n=501)	T cell CD8+ naive_XCELL	0.0863845	0.0593973	0.214704
LUSC (n=501)	T cell CD8+_CIBERSORT	-0.0692629	0.130898	0.371342
LUSC (n=501)	T cell CD8+_CIBERSORT-ABS	-0.0131267	0.774915	0.900003
LUSC (n=501)	T cell CD8+_EPIC	-0.0191562	0.676446	0.845558
LUSC (n=501)	T cell CD8+_MCPCOUNTER	0.0539999	0.23914	0.489807
LUSC (n=501)	T cell CD8+_QUANTISEQ	0.0335554	0.464691	0.723008
LUSC (n=501)	T cell CD8+_TIMER	0.108444	0.0178256	0.0938192
LUSC (n=501)	T cell CD8+_XCELL	0.114033	0.0126988	0.0746986
OV (n=303)	T cell CD8+ central memory_XCELL	-0.00659427	0.91754	0.963296
OV (n=303)	T cell CD8+ effector memory_XCELL	0.076663	0.228046	0.489807
OV (n=303)	T cell CD8+ naive_XCELL	0.148753	0.0188461	0.0979019
OV (n=303)	T cell CD8+_CIBERSORT	0.045967	0.470246	0.724235
OV (n=303)	T cell CD8+_CIBERSORT-ABS	0.0771121	0.225324	0.489807
OV (n=303)	T cell CD8+_EPIC	-0.0855883	0.178226	0.42946
OV (n=303)	T cell CD8+_MCPCOUNTER	0.0883114	0.164762	0.401858
OV (n=303)	T cell CD8+_QUANTISEQ	0.0605905	0.341013	0.614437
OV (n=303)	T cell CD8+_TIMER	0.116235	0.0670794	0.235366
OV (n=303)	T cell CD8+_XCELL	0.00590242	0.926165	0.965289
PRAD (n=498)	T cell CD8+ central memory_XCELL	0.164055	0.000782822	0.00894654
PRAD (n=498)	T cell CD8+ effector memory_XCELL	0.00729062	0.882142	0.947565
PRAD (n=498)	T cell CD8+ naive_XCELL	0.00671549	0.891379	0.947565
PRAD (n=498)	T cell CD8+_CIBERSORT	-0.0057474	0.906961	0.954696
PRAD (n=498)	T cell CD8+_CIBERSORT-ABS	0.218848	6.64e-06	0.000126469
PRAD (n=498)	T cell CD8+_EPIC	0.25382	1.54e-07	4.11e-06
PRAD (n=498)	T cell CD8+_MCPCOUNTER	0.27572	1.08e-08	3.92e-07
PRAD (n=498)	T cell CD8+_QUANTISEQ	0.263352	4.99e-08	1.53e-06
PRAD (n=498)	T cell CD8+_TIMER	0.141106	0.00392932	0.0323637
PRAD (n=498)	T cell CD8+_XCELL	0.077374	0.115086	0.343539
SKCM (n=471)	T cell CD8+ central memory_XCELL	0.0687811	0.142081	0.384003
SKCM (n=471)	T cell CD8+ effector memory_XCELL	-0.0401711	0.391581	0.65717
SKCM (n=471)	T cell CD8+ naive_XCELL	0.0677418	0.148219	0.387502
SKCM (n=471)	T cell CD8+_CIBERSORT	-0.125157	0.00738938	0.0507042
SKCM (n=471)	T cell CD8+_CIBERSORT-ABS	0.108645	0.0201748	0.100874
SKCM (n=471)	T cell CD8+_EPIC	0.175356	0.000164789	0.00227295
SKCM (n=471)	T cell CD8+_MCPCOUNTER	0.0880099	0.0601172	0.214704
SKCM (n=471)	T cell CD8+_QUANTISEQ	0.0669943	0.152758	0.391112
SKCM (n=471)	T cell CD8+_TIMER	0.0556192	0.23536	0.489807
SKCM (n=471)	T cell CD8+_XCELL	0.0385717	0.410725	0.667846
SKCM-Metastasis (n=368)	T cell CD8+ central memory_XCELL	-0.0128418	0.809732	0.911588
SKCM-Metastasis (n=368)	T cell CD8+ effector memory_XCELL	-0.104878	0.0486395	0.194558
SKCM-Metastasis (n=368)	T cell CD8+ naive_XCELL	0.0749499	0.159378	0.391112
SKCM-Metastasis (n=368)	T cell CD8+_CIBERSORT	-0.148421	0.00513944	0.03807
SKCM-Metastasis (n=368)	T cell CD8+_CIBERSORT-ABS	0.0362901	0.496122	0.737729
SKCM-Metastasis (n=368)	T cell CD8+_EPIC	0.126251	0.0174768	0.0932095
SKCM-Metastasis (n=368)	T cell CD8+_MCPCOUNTER	-0.00265547	0.960293	0.979244
SKCM-Metastasis (n=368)	T cell CD8+_QUANTISEQ	-0.00369984	0.944698	0.971412
SKCM-Metastasis (n=368)	T cell CD8+_TIMER	-0.031869	0.550078	0.772039
SKCM-Metastasis (n=368)	T cell CD8+_XCELL	-0.0338393	0.525681	0.756375
SKCM-Primary (n=103)	T cell CD8+ central memory_XCELL	0.0874672	0.382029	0.655174
SKCM-Primary (n=103)	T cell CD8+ effector memory_XCELL	0.0665044	0.506614	0.744278
SKCM-Primary (n=103)	T cell CD8+ naive_XCELL	0.131828	0.186582	0.444243
SKCM-Primary (n=103)	T cell CD8+_CIBERSORT	-0.0865087	0.387286	0.655478
SKCM-Primary (n=103)	T cell CD8+_CIBERSORT-ABS	0.14153	0.155923	0.391112
SKCM-Primary (n=103)	T cell CD8+_EPIC	0.272815	0.00553433	0.0402497
SKCM-Primary (n=103)	T cell CD8+_MCPCOUNTER	0.111846	0.263063	0.53144
SKCM-Primary (n=103)	T cell CD8+_QUANTISEQ	0.0197653	0.843687	0.932344
SKCM-Primary (n=103)	T cell CD8+_TIMER	0.236491	0.0167086	0.0903168
SKCM-Primary (n=103)	T cell CD8+_XCELL	0.0830035	0.406881	0.667018
STAD (n=415)	T cell CD8+ central memory_XCELL	0.00880472	0.864344	0.936959
STAD (n=415)	T cell CD8+ effector memory_XCELL	-0.0658256	0.201023	0.460496
STAD (n=415)	T cell CD8+ naive_XCELL	0.0875296	0.0888195	0.281967
STAD (n=415)	T cell CD8+_CIBERSORT	-0.132302	0.00992377	0.0630081
STAD (n=415)	T cell CD8+_CIBERSORT-ABS	-0.0669035	0.193729	0.45135
STAD (n=415)	T cell CD8+_EPIC	-0.0448411	0.384018	0.655174
STAD (n=415)	T cell CD8+_MCPCOUNTER	-0.0837414	0.103579	0.314404
STAD (n=415)	T cell CD8+_QUANTISEQ	-0.0788522	0.125422	0.363543
STAD (n=415)	T cell CD8+_TIMER	0.0647717	0.208346	0.46378
STAD (n=415)	T cell CD8+_XCELL	-0.052123	0.311508	0.589408
TGCT (n=150)	T cell CD8+ central memory_XCELL	0.138586	0.0941282	0.294151
TGCT (n=150)	T cell CD8+ effector memory_XCELL	0.168969	0.0407671	0.175342
TGCT (n=150)	T cell CD8+ naive_XCELL	0.0232112	0.780202	0.900003
TGCT (n=150)	T cell CD8+_CIBERSORT	-0.0759121	0.360797	0.635765
TGCT (n=150)	T cell CD8+_CIBERSORT-ABS	0.0513031	0.537159	0.76464
TGCT (n=150)	T cell CD8+_EPIC	0.134724	0.103753	0.314404
TGCT (n=150)	T cell CD8+_MCPCOUNTER	0.146379	0.0768702	0.258387
TGCT (n=150)	T cell CD8+_QUANTISEQ	0.0370716	0.655753	0.834232
TGCT (n=150)	T cell CD8+_TIMER	0.331563	4.09e-05	0.000681694
TGCT (n=150)	T cell CD8+_XCELL	0.120518	0.145938	0.386591
THCA (n=509)	T cell CD8+ central memory_XCELL	0.109225	0.0157833	0.0876849
THCA (n=509)	T cell CD8+ effector memory_XCELL	0.0365578	0.420366	0.675287
THCA (n=509)	T cell CD8+ naive_XCELL	-0.13007	0.00399948	0.0323637
THCA (n=509)	T cell CD8+_CIBERSORT	-0.188824	2.69e-05	0.0004675
THCA (n=509)	T cell CD8+_CIBERSORT-ABS	0.108737	0.0162594	0.0890924
THCA (n=509)	T cell CD8+_EPIC	0.00582812	0.897818	0.947565
THCA (n=509)	T cell CD8+_MCPCOUNTER	0.217985	1.16e-06	2.91e-05
THCA (n=509)	T cell CD8+_QUANTISEQ	0.14984	0.000899029	0.00998921
THCA (n=509)	T cell CD8+_TIMER	0.104035	0.0215304	0.106323
THCA (n=509)	T cell CD8+_XCELL	0.0100257	0.825161	0.921968
THYM (n=120)	T cell CD8+ central memory_XCELL	0.0554292	0.556284	0.775308
THYM (n=120)	T cell CD8+ effector memory_XCELL	-0.0761153	0.418801	0.675287
THYM (n=120)	T cell CD8+ naive_XCELL	0.555225	1.2e-10	1e-08
THYM (n=120)	T cell CD8+_CIBERSORT	-0.242301	0.00908072	0.0585853
THYM (n=120)	T cell CD8+_CIBERSORT-ABS	-0.211667	0.0231546	0.109892
THYM (n=120)	T cell CD8+_EPIC	0.554716	1.25e-10	1e-08
THYM (n=120)	T cell CD8+_MCPCOUNTER	0.518532	2.92e-09	1.46e-07
THYM (n=120)	T cell CD8+_QUANTISEQ	0.53714	6.06e-10	3.46e-08
THYM (n=120)	T cell CD8+_TIMER	0.597848	1.73e-12	2.31e-10
THYM (n=120)	T cell CD8+_XCELL	0.282427	0.00222735	0.0234458
UCEC (n=545)	T cell CD8+ central memory_XCELL	-0.108045	0.316346	0.589408
UCEC (n=545)	T cell CD8+ effector memory_XCELL	0.0239044	0.825039	0.921968
UCEC (n=545)	T cell CD8+ naive_XCELL	-0.00487339	0.964057	0.979244
UCEC (n=545)	T cell CD8+_CIBERSORT	0.0841761	0.435546	0.68861
UCEC (n=545)	T cell CD8+_CIBERSORT-ABS	0.064908	0.547961	0.771776
UCEC (n=545)	T cell CD8+_EPIC	-0.0797557	0.460116	0.721751
UCEC (n=545)	T cell CD8+_MCPCOUNTER	-0.0987653	0.359932	0.635765
UCEC (n=545)	T cell CD8+_QUANTISEQ	-0.106041	0.325455	0.602694
UCEC (n=545)	T cell CD8+_TIMER	0.0294449	0.78537	0.900003
UCEC (n=545)	T cell CD8+_XCELL	0.00180084	0.986714	0.987737
UCS (n=57)	T cell CD8+ central memory_XCELL	-0.320205	0.0194155	0.0995666
UCS (n=57)	T cell CD8+ effector memory_XCELL	-0.0772942	0.582239	0.791435
UCS (n=57)	T cell CD8+ naive_XCELL	0.200057	0.150924	0.391112
UCS (n=57)	T cell CD8+_CIBERSORT	-0.0375767	0.789366	0.900003
UCS (n=57)	T cell CD8+_CIBERSORT-ABS	-0.074751	0.594751	0.799336
UCS (n=57)	T cell CD8+_EPIC	0.101231	0.470753	0.724235
UCS (n=57)	T cell CD8+_MCPCOUNTER	-0.00216287	0.987737	0.987737
UCS (n=57)	T cell CD8+_QUANTISEQ	0.136575	0.329486	0.606419
UCS (n=57)	T cell CD8+_TIMER	-0.0996942	0.477549	0.731875
UCS (n=57)	T cell CD8+_XCELL	0.0871153	0.535082	0.76464
ACC (n=79)	T cell CD8+ central memory_XCELL	-0.0595864	0.616537	0.811267
ACC (n=79)	T cell CD8+ effector memory_XCELL	0.0103268	0.930901	0.965892
ACC (n=79)	T cell CD8+ naive_XCELL	0.0838233	0.480768	0.733997
ACC (n=79)	T cell CD8+_CIBERSORT	-0.142024	0.230686	0.489807
ACC (n=79)	T cell CD8+_CIBERSORT-ABS	-0.0564032	0.635522	0.822682
ACC (n=79)	T cell CD8+_EPIC	-0.00392852	0.973686	0.981044
ACC (n=79)	T cell CD8+_MCPCOUNTER	-0.0979004	0.409936	0.667846
ACC (n=79)	T cell CD8+_QUANTISEQ	-0.118798	0.316807	0.589408
ACC (n=79)	T cell CD8+_XCELL	0.129601	0.274473	0.548947
BLCA (n=408)	T cell CD8+ central memory_XCELL	0.103499	0.0472523	0.192867
BLCA (n=408)	T cell CD8+ effector memory_XCELL	0.0837343	0.10879	0.327188
BLCA (n=408)	T cell CD8+ naive_XCELL	-0.033822	0.517764	0.750382
BLCA (n=408)	T cell CD8+_CIBERSORT	-0.0528721	0.311768	0.589408
BLCA (n=408)	T cell CD8+_CIBERSORT-ABS	0.0557476	0.286146	0.562008
BLCA (n=408)	T cell CD8+_EPIC	-0.146034	0.00500133	0.0377459
BLCA (n=408)	T cell CD8+_MCPCOUNTER	0.119143	0.022258	0.108576
BLCA (n=408)	T cell CD8+_QUANTISEQ	0.118203	0.0233428	0.109892
BLCA (n=408)	T cell CD8+_XCELL	-0.0161243	0.757865	0.896882
BRCA (n=1100)	T cell CD8+ central memory_XCELL	0.0203613	0.521389	0.752908
BRCA (n=1100)	T cell CD8+ effector memory_XCELL	-0.0874797	0.0057826	0.0413043
BRCA (n=1100)	T cell CD8+ naive_XCELL	0.0373018	0.240005	0.489807
BRCA (n=1100)	T cell CD8+_CIBERSORT	-0.151342	1.64e-06	3.86e-05
BRCA (n=1100)	T cell CD8+_CIBERSORT-ABS	-0.0639718	0.0437566	0.184238
BRCA (n=1100)	T cell CD8+_EPIC	0.0373097	0.239907	0.489807
BRCA (n=1100)	T cell CD8+_MCPCOUNTER	-0.0436723	0.168879	0.409404
BRCA (n=1100)	T cell CD8+_QUANTISEQ	-0.0194027	0.541192	0.767648
BRCA (n=1100)	T cell CD8+_XCELL	-0.0270073	0.395012	0.658354
BRCA-Basal (n=191)	T cell CD8+ central memory_XCELL	0.0377828	0.620619	0.811267
BRCA-Basal (n=191)	T cell CD8+ effector memory_XCELL	-0.0248169	0.745145	0.887077
BRCA-Basal (n=191)	T cell CD8+ naive_XCELL	0.0818492	0.282963	0.560324
BRCA-Basal (n=191)	T cell CD8+_CIBERSORT	-0.1689	0.025886	0.1204
BRCA-Basal (n=191)	T cell CD8+_CIBERSORT-ABS	-0.061688	0.41873	0.675287
BRCA-Basal (n=191)	T cell CD8+_EPIC	0.0965055	0.205235	0.461201
BRCA-Basal (n=191)	T cell CD8+_MCPCOUNTER	0.0443171	0.561473	0.779824
BRCA-Basal (n=191)	T cell CD8+_QUANTISEQ	0.0471841	0.536404	0.76464
BRCA-Basal (n=191)	T cell CD8+_XCELL	0.0227516	0.765711	0.89975
BRCA-Her2 (n=82)	T cell CD8+ central memory_XCELL	-0.234884	0.0470274	0.192867
BRCA-Her2 (n=82)	T cell CD8+ effector memory_XCELL	-0.0317288	0.791331	0.900003
BRCA-Her2 (n=82)	T cell CD8+ naive_XCELL	-0.00892015	0.940719	0.971412
BRCA-Her2 (n=82)	T cell CD8+_CIBERSORT	-0.142605	0.232092	0.489807
BRCA-Her2 (n=82)	T cell CD8+_CIBERSORT-ABS	-0.20368	0.0861491	0.2779
BRCA-Her2 (n=82)	T cell CD8+_EPIC	0.025908	0.828968	0.923641
BRCA-Her2 (n=82)	T cell CD8+_MCPCOUNTER	-0.177469	0.135859	0.3827
BRCA-Her2 (n=82)	T cell CD8+_QUANTISEQ	-0.205603	0.0831608	0.272658
BRCA-Her2 (n=82)	T cell CD8+_XCELL	-0.184639	0.1205	0.354411
BRCA-LumA (n=568)	T cell CD8+ central memory_XCELL	0.0352635	0.423644	0.67783
BRCA-LumA (n=568)	T cell CD8+ effector memory_XCELL	-0.0959774	0.0291055	0.132177
BRCA-LumA (n=568)	T cell CD8+ naive_XCELL	0.075267	0.0873255	0.279442
BRCA-LumA (n=568)	T cell CD8+_CIBERSORT	-0.175614	5.95e-05	0.000915999
BRCA-LumA (n=568)	T cell CD8+_CIBERSORT-ABS	-0.0427474	0.332014	0.606419
BRCA-LumA (n=568)	T cell CD8+_EPIC	0.0187997	0.66977	0.839837
BRCA-LumA (n=568)	T cell CD8+_MCPCOUNTER	-0.00412983	0.925367	0.965289
BRCA-LumA (n=568)	T cell CD8+_QUANTISEQ	0.013413	0.760933	0.897856
BRCA-LumA (n=568)	T cell CD8+_XCELL	-0.0253162	0.565745	0.780604
BRCA-LumB (n=219)	T cell CD8+ central memory_XCELL	0.0395847	0.585662	0.791435
BRCA-LumB (n=219)	T cell CD8+ effector memory_XCELL	-0.0693982	0.338828	0.613263
BRCA-LumB (n=219)	T cell CD8+ naive_XCELL	-0.138121	0.0560646	0.208963
BRCA-LumB (n=219)	T cell CD8+_CIBERSORT	-0.037702	0.60363	0.802166
BRCA-LumB (n=219)	T cell CD8+_CIBERSORT-ABS	0.00521267	0.942795	0.971412
BRCA-LumB (n=219)	T cell CD8+_EPIC	0.0610286	0.400404	0.659102
BRCA-LumB (n=219)	T cell CD8+_MCPCOUNTER	0.00619061	0.932086	0.965892
BRCA-LumB (n=219)	T cell CD8+_QUANTISEQ	-0.0282957	0.696836	0.857645
BRCA-LumB (n=219)	T cell CD8+_XCELL	-0.0133699	0.853968	0.932344
COAD (n=458)	T cell CD8+ central memory_XCELL	-0.00269193	0.964556	0.979244
COAD (n=458)	T cell CD8+ effector memory_XCELL	-0.0228239	0.70631	0.863988
COAD (n=458)	T cell CD8+ naive_XCELL	0.0200815	0.740244	0.885319
COAD (n=458)	T cell CD8+_CIBERSORT	-0.117538	0.0515316	0.200123
COAD (n=458)	T cell CD8+_CIBERSORT-ABS	-0.0608238	0.314904	0.589408
COAD (n=458)	T cell CD8+_EPIC	-0.0920452	0.127839	0.365255
COAD (n=458)	T cell CD8+_MCPCOUNTER	-0.0790251	0.191363	0.450265
COAD (n=458)	T cell CD8+_QUANTISEQ	-0.0347641	0.565938	0.780604
COAD (n=458)	T cell CD8+_XCELL	0.0768268	0.204048	0.461201
DLBC (n=48)	T cell CD8+ central memory_XCELL	-0.0639686	0.691117	0.855873
DLBC (n=48)	T cell CD8+ effector memory_XCELL	-0.0900936	0.575355	0.78566
DLBC (n=48)	T cell CD8+ naive_XCELL	-0.0629562	0.695769	0.857645
DLBC (n=48)	T cell CD8+_CIBERSORT	-0.169973	0.288029	0.562008
DLBC (n=48)	T cell CD8+_CIBERSORT-ABS	0.005791	0.971335	0.981044
DLBC (n=48)	T cell CD8+_EPIC	0.106168	0.508832	0.744278
DLBC (n=48)	T cell CD8+_MCPCOUNTER	0.0210579	0.896028	0.947565
DLBC (n=48)	T cell CD8+_QUANTISEQ	0.0454808	0.777668	0.900003
DLBC (n=48)	T cell CD8+_XCELL	-0.224034	0.159093	0.391112
ESCA (n=185)	T cell CD8+ central memory_XCELL	0.126798	0.0898527	0.283001
ESCA (n=185)	T cell CD8+ effector memory_XCELL	0.0247601	0.741455	0.885319
ESCA (n=185)	T cell CD8+ naive_XCELL	-0.013675	0.855426	0.932344
ESCA (n=185)	T cell CD8+_CIBERSORT	-0.0372613	0.619469	0.811267
ESCA (n=185)	T cell CD8+_CIBERSORT-ABS	-0.0379511	0.612995	0.811267
ESCA (n=185)	T cell CD8+_EPIC	-0.113982	0.127623	0.365255
ESCA (n=185)	T cell CD8+_MCPCOUNTER	-0.0222331	0.767042	0.89975
ESCA (n=185)	T cell CD8+_QUANTISEQ	0.00401149	0.957377	0.979244
ESCA (n=185)	T cell CD8+_XCELL	-0.0896697	0.231276	0.489807
GBM (n=153)	T cell CD8+ central memory_XCELL	0.247854	0.0034982	0.0318019
GBM (n=153)	T cell CD8+ effector memory_XCELL	0.126213	0.14166	0.384003
GBM (n=153)	T cell CD8+ naive_XCELL	0.0379021	0.660136	0.835615
GBM (n=153)	T cell CD8+_CIBERSORT	0.045215	0.599828	0.800509
GBM (n=153)	T cell CD8+_CIBERSORT-ABS	0.076499	0.374274	0.648093
GBM (n=153)	T cell CD8+_EPIC	0.251549	0.0030253	0.0288124
GBM (n=153)	T cell CD8+_MCPCOUNTER	0.0915094	0.287551	0.562008
GBM (n=153)	T cell CD8+_QUANTISEQ	0.0401033	0.641729	0.827452
GBM (n=153)	T cell CD8+_XCELL	0.0451465	0.600382	0.800509
HNSC (n=522)	T cell CD8+ central memory_XCELL	0.115345	0.0104517	0.064318
HNSC (n=522)	T cell CD8+ effector memory_XCELL	0.0891556	0.0481012	0.194348
HNSC (n=522)	T cell CD8+ naive_XCELL	0.118886	0.00829859	0.054417
HNSC (n=522)	T cell CD8+_CIBERSORT	0.0220424	0.625734	0.815094
HNSC (n=522)	T cell CD8+_CIBERSORT-ABS	0.0918786	0.0416407	0.177194
HNSC (n=522)	T cell CD8+_EPIC	-0.11502	0.0106721	0.0646793
HNSC (n=522)	T cell CD8+_MCPCOUNTER	0.120453	0.00747887	0.0507042
HNSC (n=522)	T cell CD8+_QUANTISEQ	0.115528	0.0103295	0.064318
HNSC (n=522)	T cell CD8+_XCELL	0.0881545	0.0506784	0.198739
HNSC-HPV- (n=422)	T cell CD8+ central memory_XCELL	0.0147107	0.769287	0.89975
HNSC-HPV- (n=422)	T cell CD8+ effector memory_XCELL	0.0448877	0.370575	0.647293
HNSC-HPV- (n=422)	T cell CD8+ naive_XCELL	0.148185	0.00296986	0.0288124
HNSC-HPV- (n=422)	T cell CD8+_CIBERSORT	-0.0745176	0.136815	0.3827
HNSC-HPV- (n=422)	T cell CD8+_CIBERSORT-ABS	-0.00930822	0.852769	0.932344
HNSC-HPV- (n=422)	T cell CD8+_EPIC	-0.230798	3.09e-06	6.18e-05
HNSC-HPV- (n=422)	T cell CD8+_MCPCOUNTER	0.0123498	0.805502	0.911588
HNSC-HPV- (n=422)	T cell CD8+_QUANTISEQ	0.0231008	0.645063	0.827452
HNSC-HPV- (n=422)	T cell CD8+_XCELL	0.00950027	0.849768	0.932344
HNSC-HPV+ (n=98)	T cell CD8+ central memory_XCELL	0.246578	0.0198369	0.10044
HNSC-HPV+ (n=98)	T cell CD8+ effector memory_XCELL	0.157351	0.140844	0.384003
HNSC-HPV+ (n=98)	T cell CD8+ naive_XCELL	-0.070548	0.511207	0.744278
HNSC-HPV+ (n=98)	T cell CD8+_CIBERSORT	0.156293	0.143569	0.385419
HNSC-HPV+ (n=98)	T cell CD8+_CIBERSORT-ABS	0.208448	0.0499624	0.197871
HNSC-HPV+ (n=98)	T cell CD8+_EPIC	0.186807	0.0796215	0.263212
HNSC-HPV+ (n=98)	T cell CD8+_MCPCOUNTER	0.223057	0.0356306	0.156618
HNSC-HPV+ (n=98)	T cell CD8+_QUANTISEQ	0.204649	0.0543829	0.207173
HNSC-HPV+ (n=98)	T cell CD8+_XCELL	0.175371	0.100213	0.308349
KICH (n=66)	T cell CD8+ central memory_XCELL	0.0193931	0.878136	0.946777
KICH (n=66)	T cell CD8+ effector memory_XCELL	-0.168205	0.180452	0.432221
KICH (n=66)	T cell CD8+ naive_XCELL	-0.231041	0.0640672	0.226787
KICH (n=66)	T cell CD8+_CIBERSORT	-0.225901	0.0703891	0.244832
KICH (n=66)	T cell CD8+_CIBERSORT-ABS	-0.0237731	0.850898	0.932344
KICH (n=66)	T cell CD8+_EPIC	0.466847	8.85e-05	0.00126426
KICH (n=66)	T cell CD8+_MCPCOUNTER	0.0612991	0.627622	0.815094
KICH (n=66)	T cell CD8+_QUANTISEQ	0.0851041	0.500284	0.741162
KICH (n=66)	T cell CD8+_XCELL	0.267466	0.0312441	0.138863
KIRC (n=533)	T cell CD8+ central memory_XCELL	0.123935	0.00772044	0.0514696
KIRC (n=533)	T cell CD8+ effector memory_XCELL	-0.0134774	0.772888	0.900003
KIRC (n=533)	T cell CD8+ naive_XCELL	-0.0154529	0.740716	0.885319
KIRC (n=533)	T cell CD8+_CIBERSORT	0.00905662	0.846231	0.932344
KIRC (n=533)	T cell CD8+_CIBERSORT-ABS	0.0889194	0.0564199	0.208963
KIRC (n=533)	T cell CD8+_EPIC	0.270602	3.53e-09	1.57e-07
KIRC (n=533)	T cell CD8+_MCPCOUNTER	0.134587	0.0037911	0.0323637
KIRC (n=533)	T cell CD8+_QUANTISEQ	0.0818223	0.0792639	0.263212
KIRC (n=533)	T cell CD8+_XCELL	0.0903556	0.0525357	0.20206
KIRP (n=290)	T cell CD8+ central memory_XCELL	-0.0890544	0.153777	0.391112
KIRP (n=290)	T cell CD8+ effector memory_XCELL	-0.0427306	0.494396	0.737729
KIRP (n=290)	T cell CD8+ naive_XCELL	-0.111173	0.074657	0.255238
KIRP (n=290)	T cell CD8+_CIBERSORT	-0.129608	0.0374816	0.162963
KIRP (n=290)	T cell CD8+_CIBERSORT-ABS	0.0149345	0.811313	0.911588
KIRP (n=290)	T cell CD8+_EPIC	0.267447	1.33e-05	0.000242435
KIRP (n=290)	T cell CD8+_MCPCOUNTER	-0.0527734	0.398592	0.659102
KIRP (n=290)	T cell CD8+_QUANTISEQ	-0.0629904	0.31352	0.589408
KIRP (n=290)	T cell CD8+_XCELL	0.0109961	0.860473	0.935297
LGG (n=516)	T cell CD8+ central memory_XCELL	-0.0270336	0.555458	0.775308
LGG (n=516)	T cell CD8+ effector memory_XCELL	-0.0913559	0.0459035	0.191265
LGG (n=516)	T cell CD8+ naive_XCELL	-0.00611976	0.893839	0.947565
LGG (n=516)	T cell CD8+_CIBERSORT	-0.0410587	0.370412	0.647293
LGG (n=516)	T cell CD8+_CIBERSORT-ABS	0.00106611	0.981453	0.986385
LGG (n=516)	T cell CD8+_EPIC	-0.179725	7.77e-05	0.00115154
LGG (n=516)	T cell CD8+_MCPCOUNTER	-0.0786716	0.085765	0.2779
LGG (n=516)	T cell CD8+_QUANTISEQ	0.0420684	0.358751	0.635765
LGG (n=516)	T cell CD8+_XCELL	0.0391854	0.392659	0.65717
LIHC (n=371)	T cell CD8+ central memory_XCELL	-0.0182782	0.735139	0.885319
LIHC (n=371)	T cell CD8+ effector memory_XCELL	-0.00717522	0.894358	0.947565
LIHC (n=371)	T cell CD8+ naive_XCELL	-0.155014	0.00389838	0.0323637
LIHC (n=371)	T cell CD8+_CIBERSORT	-0.030251	0.575496	0.78566
LIHC (n=371)	T cell CD8+_CIBERSORT-ABS	0.129951	0.0157254	0.0876849
LIHC (n=371)	T cell CD8+_EPIC	-0.0374612	0.487978	0.737729
LIHC (n=371)	T cell CD8+_MCPCOUNTER	0.157719	0.00331109	0.0308008
LIHC (n=371)	T cell CD8+_QUANTISEQ	0.254049	1.75e-06	3.89e-05
LIHC (n=371)	T cell CD8+_XCELL	0.0393459	0.46634	0.723008
LUAD (n=515)	T cell CD8+ central memory_XCELL	0.0585846	0.19408	0.45135
LUAD (n=515)	T cell CD8+ effector memory_XCELL	-0.0181123	0.688295	0.855873
LUAD (n=515)	T cell CD8+ naive_XCELL	0.139465	0.00190953	0.0206436
LUAD (n=515)	T cell CD8+_CIBERSORT	-0.0641401	0.155029	0.391112
LUAD (n=515)	T cell CD8+_CIBERSORT-ABS	0.0121933	0.787116	0.900003
LUAD (n=515)	T cell CD8+_EPIC	-0.21081	2.33e-06	4.92e-05
LUAD (n=515)	T cell CD8+_MCPCOUNTER	0.05364	0.234505	0.489807
LUAD (n=515)	T cell CD8+_QUANTISEQ	0.0590311	0.190698	0.450265
LUAD (n=515)	T cell CD8+_XCELL	-0.035964	0.42559	0.678231
LUSC (n=501)	T cell CD8+ central memory_XCELL	0.0648876	0.157086	0.391112
LUSC (n=501)	T cell CD8+ effector memory_XCELL	0.0474729	0.300816	0.575724
LUSC (n=501)	T cell CD8+ naive_XCELL	0.0863845	0.0593973	0.214704
LUSC (n=501)	T cell CD8+_CIBERSORT	-0.0692629	0.130898	0.371342
LUSC (n=501)	T cell CD8+_CIBERSORT-ABS	-0.0131267	0.774915	0.900003
LUSC (n=501)	T cell CD8+_EPIC	-0.0191562	0.676446	0.845558
LUSC (n=501)	T cell CD8+_MCPCOUNTER	0.0539999	0.23914	0.489807
LUSC (n=501)	T cell CD8+_QUANTISEQ	0.0335554	0.464691	0.723008
LUSC (n=501)	T cell CD8+_XCELL	0.114033	0.0126988	0.0746986
OV (n=303)	T cell CD8+ central memory_XCELL	-0.00659427	0.91754	0.963296
OV (n=303)	T cell CD8+ effector memory_XCELL	0.076663	0.228046	0.489807
OV (n=303)	T cell CD8+ naive_XCELL	0.148753	0.0188461	0.0979019
OV (n=303)	T cell CD8+_CIBERSORT	0.045967	0.470246	0.724235
OV (n=303)	T cell CD8+_CIBERSORT-ABS	0.0771121	0.225324	0.489807
OV (n=303)	T cell CD8+_EPIC	-0.0855883	0.178226	0.42946
OV (n=303)	T cell CD8+_MCPCOUNTER	0.0883114	0.164762	0.401858
OV (n=303)	T cell CD8+_QUANTISEQ	0.0605905	0.341013	0.614437
OV (n=303)	T cell CD8+_XCELL	0.00590242	0.926165	0.965289
PRAD (n=498)	T cell CD8+ central memory_XCELL	0.164055	0.000782822	0.00894654
PRAD (n=498)	T cell CD8+ effector memory_XCELL	0.00729062	0.882142	0.947565
PRAD (n=498)	T cell CD8+ naive_XCELL	0.00671549	0.891379	0.947565
PRAD (n=498)	T cell CD8+_CIBERSORT	-0.0057474	0.906961	0.954696
PRAD (n=498)	T cell CD8+_CIBERSORT-ABS	0.218848	6.64e-06	0.000126469
PRAD (n=498)	T cell CD8+_EPIC	0.25382	1.54e-07	4.11e-06
PRAD (n=498)	T cell CD8+_MCPCOUNTER	0.27572	1.08e-08	3.92e-07
PRAD (n=498)	T cell CD8+_QUANTISEQ	0.263352	4.99e-08	1.53e-06
PRAD (n=498)	T cell CD8+_XCELL	0.077374	0.115086	0.343539
SKCM (n=471)	T cell CD8+ central memory_XCELL	0.0687811	0.142081	0.384003
SKCM (n=471)	T cell CD8+ effector memory_XCELL	-0.0401711	0.391581	0.65717
SKCM (n=471)	T cell CD8+ naive_XCELL	0.0677418	0.148219	0.387502
SKCM (n=471)	T cell CD8+_CIBERSORT	-0.125157	0.00738938	0.0507042
SKCM (n=471)	T cell CD8+_CIBERSORT-ABS	0.108645	0.0201748	0.100874
SKCM (n=471)	T cell CD8+_EPIC	0.175356	0.000164789	0.00227295
SKCM (n=471)	T cell CD8+_MCPCOUNTER	0.0880099	0.0601172	0.214704
SKCM (n=471)	T cell CD8+_QUANTISEQ	0.0669943	0.152758	0.391112
SKCM (n=471)	T cell CD8+_XCELL	0.0385717	0.410725	0.667846
SKCM-Metastasis (n=368)	T cell CD8+ central memory_XCELL	-0.0128418	0.809732	0.911588
SKCM-Metastasis (n=368)	T cell CD8+ effector memory_XCELL	-0.104878	0.0486395	0.194558
SKCM-Metastasis (n=368)	T cell CD8+ naive_XCELL	0.0749499	0.159378	0.391112
SKCM-Metastasis (n=368)	T cell CD8+_CIBERSORT	-0.148421	0.00513944	0.03807
SKCM-Metastasis (n=368)	T cell CD8+_CIBERSORT-ABS	0.0362901	0.496122	0.737729
SKCM-Metastasis (n=368)	T cell CD8+_EPIC	0.126251	0.0174768	0.0932095
SKCM-Metastasis (n=368)	T cell CD8+_MCPCOUNTER	-0.00265547	0.960293	0.979244
SKCM-Metastasis (n=368)	T cell CD8+_QUANTISEQ	-0.00369984	0.944698	0.971412
SKCM-Metastasis (n=368)	T cell CD8+_XCELL	-0.0338393	0.525681	0.756375
SKCM-Primary (n=103)	T cell CD8+ central memory_XCELL	0.0874672	0.382029	0.655174
SKCM-Primary (n=103)	T cell CD8+ effector memory_XCELL	0.0665044	0.506614	0.744278
SKCM-Primary (n=103)	T cell CD8+ naive_XCELL	0.131828	0.186582	0.444243
SKCM-Primary (n=103)	T cell CD8+_CIBERSORT	-0.0865087	0.387286	0.655478
SKCM-Primary (n=103)	T cell CD8+_CIBERSORT-ABS	0.14153	0.155923	0.391112
SKCM-Primary (n=103)	T cell CD8+_EPIC	0.272815	0.00553433	0.0402497
SKCM-Primary (n=103)	T cell CD8+_MCPCOUNTER	0.111846	0.263063	0.53144
SKCM-Primary (n=103)	T cell CD8+_QUANTISEQ	0.0197653	0.843687	0.932344
SKCM-Primary (n=103)	T cell CD8+_XCELL	0.0830035	0.406881	0.667018
STAD (n=415)	T cell CD8+ central memory_XCELL	0.00880472	0.864344	0.936959
STAD (n=415)	T cell CD8+ effector memory_XCELL	-0.0658256	0.201023	0.460496
STAD (n=415)	T cell CD8+ naive_XCELL	0.0875296	0.0888195	0.281967
STAD (n=415)	T cell CD8+_CIBERSORT	-0.132302	0.00992377	0.0630081
STAD (n=415)	T cell CD8+_CIBERSORT-ABS	-0.0669035	0.193729	0.45135
STAD (n=415)	T cell CD8+_EPIC	-0.0448411	0.384018	0.655174
STAD (n=415)	T cell CD8+_MCPCOUNTER	-0.0837414	0.103579	0.314404
STAD (n=415)	T cell CD8+_QUANTISEQ	-0.0788522	0.125422	0.363543
STAD (n=415)	T cell CD8+_XCELL	-0.052123	0.311508	0.589408
TGCT (n=150)	T cell CD8+ central memory_XCELL	0.138586	0.0941282	0.294151
TGCT (n=150)	T cell CD8+ effector memory_XCELL	0.168969	0.0407671	0.175342
TGCT (n=150)	T cell CD8+ naive_XCELL	0.0232112	0.780202	0.900003
TGCT (n=150)	T cell CD8+_CIBERSORT	-0.0759121	0.360797	0.635765
TGCT (n=150)	T cell CD8+_CIBERSORT-ABS	0.0513031	0.537159	0.76464
TGCT (n=150)	T cell CD8+_EPIC	0.134724	0.103753	0.314404
TGCT (n=150)	T cell CD8+_MCPCOUNTER	0.146379	0.0768702	0.258387
TGCT (n=150)	T cell CD8+_QUANTISEQ	0.0370716	0.655753	0.834232
TGCT (n=150)	T cell CD8+_XCELL	0.120518	0.145938	0.386591
THCA (n=509)	T cell CD8+ central memory_XCELL	0.109225	0.0157833	0.0876849
THCA (n=509)	T cell CD8+ effector memory_XCELL	0.0365578	0.420366	0.675287
THCA (n=509)	T cell CD8+ naive_XCELL	-0.13007	0.00399948	0.0323637
THCA (n=509)	T cell CD8+_CIBERSORT	-0.188824	2.69e-05	0.0004675
THCA (n=509)	T cell CD8+_CIBERSORT-ABS	0.108737	0.0162594	0.0890924
THCA (n=509)	T cell CD8+_EPIC	0.00582812	0.897818	0.947565
THCA (n=509)	T cell CD8+_MCPCOUNTER	0.217985	1.16e-06	2.91e-05
THCA (n=509)	T cell CD8+_QUANTISEQ	0.14984	0.000899029	0.00998921
THCA (n=509)	T cell CD8+_XCELL	0.0100257	0.825161	0.921968
THYM (n=120)	T cell CD8+ central memory_XCELL	0.0554292	0.556284	0.775308
THYM (n=120)	T cell CD8+ effector memory_XCELL	-0.0761153	0.418801	0.675287
THYM (n=120)	T cell CD8+ naive_XCELL	0.555225	1.2e-10	1e-08
THYM (n=120)	T cell CD8+_CIBERSORT	-0.242301	0.00908072	0.0585853
THYM (n=120)	T cell CD8+_CIBERSORT-ABS	-0.211667	0.0231546	0.109892
THYM (n=120)	T cell CD8+_EPIC	0.554716	1.25e-10	1e-08
THYM (n=120)	T cell CD8+_MCPCOUNTER	0.518532	2.92e-09	1.46e-07
THYM (n=120)	T cell CD8+_QUANTISEQ	0.53714	6.06e-10	3.46e-08
THYM (n=120)	T cell CD8+_XCELL	0.282427	0.00222735	0.0234458
UCEC (n=545)	T cell CD8+ central memory_XCELL	-0.108045	0.316346	0.589408
UCEC (n=545)	T cell CD8+ effector memory_XCELL	0.0239044	0.825039	0.921968
UCEC (n=545)	T cell CD8+ naive_XCELL	-0.00487339	0.964057	0.979244
UCEC (n=545)	T cell CD8+_CIBERSORT	0.0841761	0.435546	0.68861
UCEC (n=545)	T cell CD8+_CIBERSORT-ABS	0.064908	0.547961	0.771776
UCEC (n=545)	T cell CD8+_EPIC	-0.0797557	0.460116	0.721751
UCEC (n=545)	T cell CD8+_MCPCOUNTER	-0.0987653	0.359932	0.635765
UCEC (n=545)	T cell CD8+_QUANTISEQ	-0.106041	0.325455	0.602694
UCEC (n=545)	T cell CD8+_XCELL	0.00180084	0.986714	0.987737
UCS (n=57)	T cell CD8+ central memory_XCELL	-0.320205	0.0194155	0.0995666
UCS (n=57)	T cell CD8+ effector memory_XCELL	-0.0772942	0.582239	0.791435
UCS (n=57)	T cell CD8+ naive_XCELL	0.200057	0.150924	0.391112
UCS (n=57)	T cell CD8+_CIBERSORT	-0.0375767	0.789366	0.900003
UCS (n=57)	T cell CD8+_CIBERSORT-ABS	-0.074751	0.594751	0.799336
UCS (n=57)	T cell CD8+_EPIC	0.101231	0.470753	0.724235
UCS (n=57)	T cell CD8+_MCPCOUNTER	-0.00216287	0.987737	0.987737
UCS (n=57)	T cell CD8+_QUANTISEQ	0.136575	0.329486	0.606419
UCS (n=57)	T cell CD8+_XCELL	0.0871153	0.535082	0.76464
ACC (n=79)	T cell regulatory (Tregs)_CIBERSORT	-0.280708	0.0161477	0.0630156
ACC (n=79)	T cell regulatory (Tregs)_CIBERSORT-ABS	-0.253063	0.0307611	0.100444
ACC (n=79)	T cell regulatory (Tregs)_QUANTISEQ	0.150027	0.205194	0.356859
ACC (n=79)	T cell regulatory (Tregs)_XCELL	-0.000638909	0.99572	0.99572
BLCA (n=408)	T cell regulatory (Tregs)_CIBERSORT	-0.0570901	0.274682	0.422814
BLCA (n=408)	T cell regulatory (Tregs)_CIBERSORT-ABS	0.00800712	0.878333	0.920341
BLCA (n=408)	T cell regulatory (Tregs)_QUANTISEQ	0.172493	0.000891598	0.00559434
BLCA (n=408)	T cell regulatory (Tregs)_XCELL	0.152092	0.00344742	0.0172371
BRCA (n=1100)	T cell regulatory (Tregs)_CIBERSORT	-0.123655	9.28e-05	0.000902976
BRCA (n=1100)	T cell regulatory (Tregs)_CIBERSORT-ABS	-0.087483	0.00578072	0.0264261
BRCA (n=1100)	T cell regulatory (Tregs)_QUANTISEQ	0.190518	1.41e-09	1.13e-07
BRCA (n=1100)	T cell regulatory (Tregs)_XCELL	0.157488	6.03e-07	1.21e-05
BRCA-Basal (n=191)	T cell regulatory (Tregs)_CIBERSORT	-0.224098	0.00295239	0.0152382
BRCA-Basal (n=191)	T cell regulatory (Tregs)_CIBERSORT-ABS	-0.161736	0.0329966	0.105589
BRCA-Basal (n=191)	T cell regulatory (Tregs)_QUANTISEQ	0.134211	0.0774626	0.190677
BRCA-Basal (n=191)	T cell regulatory (Tregs)_XCELL	-0.0690764	0.365097	0.503582
BRCA-Her2 (n=82)	T cell regulatory (Tregs)_CIBERSORT	-0.184567	0.120647	0.264006
BRCA-Her2 (n=82)	T cell regulatory (Tregs)_CIBERSORT-ABS	-0.207548	0.0802249	0.194485
BRCA-Her2 (n=82)	T cell regulatory (Tregs)_QUANTISEQ	-0.0491087	0.682059	0.801919
BRCA-Her2 (n=82)	T cell regulatory (Tregs)_XCELL	0.233539	0.048341	0.140628
BRCA-LumA (n=568)	T cell regulatory (Tregs)_CIBERSORT	-0.0615935	0.161984	0.308542
BRCA-LumA (n=568)	T cell regulatory (Tregs)_CIBERSORT-ABS	-0.0238998	0.587689	0.729283
BRCA-LumA (n=568)	T cell regulatory (Tregs)_QUANTISEQ	0.246181	1.42e-08	7.55e-07
BRCA-LumA (n=568)	T cell regulatory (Tregs)_XCELL	0.240966	2.89e-08	1.16e-06
BRCA-LumB (n=219)	T cell regulatory (Tregs)_CIBERSORT	-0.237518	0.000909081	0.00559434
BRCA-LumB (n=219)	T cell regulatory (Tregs)_CIBERSORT-ABS	-0.178703	0.013138	0.0525522
BRCA-LumB (n=219)	T cell regulatory (Tregs)_QUANTISEQ	0.0231331	0.750112	0.835202
BRCA-LumB (n=219)	T cell regulatory (Tregs)_XCELL	0.0674433	0.352641	0.498647
COAD (n=458)	T cell regulatory (Tregs)_CIBERSORT	-0.125347	0.0377663	0.114011
COAD (n=458)	T cell regulatory (Tregs)_CIBERSORT-ABS	-0.0854574	0.157573	0.303755
COAD (n=458)	T cell regulatory (Tregs)_QUANTISEQ	-0.056605	0.349705	0.498647
COAD (n=458)	T cell regulatory (Tregs)_XCELL	-0.0091394	0.880076	0.920341
DLBC (n=48)	T cell regulatory (Tregs)_CIBERSORT	-0.245326	0.122103	0.264006
DLBC (n=48)	T cell regulatory (Tregs)_CIBERSORT-ABS	-0.17982	0.260587	0.415177
DLBC (n=48)	T cell regulatory (Tregs)_QUANTISEQ	-0.0202777	0.89986	0.928888
DLBC (n=48)	T cell regulatory (Tregs)_XCELL	0.198214	0.214122	0.364463
ESCA (n=185)	T cell regulatory (Tregs)_CIBERSORT	-0.103975	0.164826	0.31026
ESCA (n=185)	T cell regulatory (Tregs)_CIBERSORT-ABS	-0.11988	0.108949	0.242108
ESCA (n=185)	T cell regulatory (Tregs)_QUANTISEQ	0.0281167	0.707905	0.805142
ESCA (n=185)	T cell regulatory (Tregs)_XCELL	-0.0527648	0.481761	0.618992
GBM (n=153)	T cell regulatory (Tregs)_CIBERSORT	-0.0994145	0.247755	0.400411
GBM (n=153)	T cell regulatory (Tregs)_CIBERSORT-ABS	-0.0889592	0.301252	0.450471
GBM (n=153)	T cell regulatory (Tregs)_QUANTISEQ	0.315717	0.000171211	0.00144178
GBM (n=153)	T cell regulatory (Tregs)_XCELL	-0.0536353	0.533626	0.672284
HNSC (n=522)	T cell regulatory (Tregs)_CIBERSORT	-0.105215	0.019578	0.0711928
HNSC (n=522)	T cell regulatory (Tregs)_CIBERSORT-ABS	-0.0455706	0.31309	0.459582
HNSC (n=522)	T cell regulatory (Tregs)_QUANTISEQ	0.168655	0.000171017	0.00144178
HNSC (n=522)	T cell regulatory (Tregs)_XCELL	0.00971543	0.829802	0.885122
HNSC-HPV- (n=422)	T cell regulatory (Tregs)_CIBERSORT	-0.239407	1.27e-06	2.26e-05
HNSC-HPV- (n=422)	T cell regulatory (Tregs)_CIBERSORT-ABS	-0.184327	0.000209888	0.0016791
HNSC-HPV- (n=422)	T cell regulatory (Tregs)_QUANTISEQ	0.110722	0.026807	0.0893566
HNSC-HPV- (n=422)	T cell regulatory (Tregs)_XCELL	0.00236166	0.962445	0.980836
HNSC-HPV+ (n=98)	T cell regulatory (Tregs)_CIBERSORT	0.26673	0.0115138	0.0484791
HNSC-HPV+ (n=98)	T cell regulatory (Tregs)_CIBERSORT-ABS	0.250201	0.0180411	0.0684043
HNSC-HPV+ (n=98)	T cell regulatory (Tregs)_QUANTISEQ	0.140821	0.188076	0.338115
HNSC-HPV+ (n=98)	T cell regulatory (Tregs)_XCELL	-0.0234716	0.827172	0.885122
KICH (n=66)	T cell regulatory (Tregs)_CIBERSORT	0.171085	0.172996	0.318154
KICH (n=66)	T cell regulatory (Tregs)_CIBERSORT-ABS	0.237091	0.0572223	0.155179
KICH (n=66)	T cell regulatory (Tregs)_QUANTISEQ	0.155041	0.217501	0.366318
KICH (n=66)	T cell regulatory (Tregs)_XCELL	0.00311906	0.980327	0.986493
KIRC (n=533)	T cell regulatory (Tregs)_CIBERSORT	-0.157984	0.000663454	0.00461533
KIRC (n=533)	T cell regulatory (Tregs)_CIBERSORT-ABS	-0.105794	0.0231038	0.0806437
KIRC (n=533)	T cell regulatory (Tregs)_QUANTISEQ	-0.115458	0.0131174	0.0525522
KIRC (n=533)	T cell regulatory (Tregs)_XCELL	0.0445487	0.339892	0.489934
KIRP (n=290)	T cell regulatory (Tregs)_CIBERSORT	-0.104775	0.0930758	0.215828
KIRP (n=290)	T cell regulatory (Tregs)_CIBERSORT-ABS	-0.0450514	0.471227	0.612978
KIRP (n=290)	T cell regulatory (Tregs)_QUANTISEQ	0.0667074	0.285761	0.435446
KIRP (n=290)	T cell regulatory (Tregs)_XCELL	-0.0783507	0.209727	0.360821
LGG (n=516)	T cell regulatory (Tregs)_CIBERSORT	0.107811	0.0183837	0.0684043
LGG (n=516)	T cell regulatory (Tregs)_CIBERSORT-ABS	0.119792	0.00875096	0.0388931
LGG (n=516)	T cell regulatory (Tregs)_QUANTISEQ	0.195861	1.61e-05	0.000198411
LGG (n=516)	T cell regulatory (Tregs)_XCELL	-0.103835	0.023185	0.0806437
LIHC (n=371)	T cell regulatory (Tregs)_CIBERSORT	0.0982923	0.068229	0.17328
LIHC (n=371)	T cell regulatory (Tregs)_CIBERSORT-ABS	0.236065	9.35e-06	0.000124722
LIHC (n=371)	T cell regulatory (Tregs)_QUANTISEQ	0.273402	2.49e-07	5.69e-06
LIHC (n=371)	T cell regulatory (Tregs)_XCELL	0.011705	0.828498	0.885122
LUAD (n=515)	T cell regulatory (Tregs)_CIBERSORT	-0.0678065	0.132721	0.271724
LUAD (n=515)	T cell regulatory (Tregs)_CIBERSORT-ABS	-0.0412583	0.36064	0.50176
LUAD (n=515)	T cell regulatory (Tregs)_QUANTISEQ	0.0587264	0.193001	0.339343
LUAD (n=515)	T cell regulatory (Tregs)_XCELL	0.0386884	0.391355	0.530651
LUSC (n=501)	T cell regulatory (Tregs)_CIBERSORT	-0.0408953	0.372823	0.509844
LUSC (n=501)	T cell regulatory (Tregs)_CIBERSORT-ABS	-0.0248669	0.587984	0.729283
LUSC (n=501)	T cell regulatory (Tregs)_QUANTISEQ	0.0818006	0.0742845	0.185711
LUSC (n=501)	T cell regulatory (Tregs)_XCELL	0.0500997	0.274829	0.422814
OV (n=303)	T cell regulatory (Tregs)_CIBERSORT	0.0828163	0.192752	0.339343
OV (n=303)	T cell regulatory (Tregs)_CIBERSORT-ABS	0.133293	0.0355415	0.111503
OV (n=303)	T cell regulatory (Tregs)_QUANTISEQ	0.107026	0.0919526	0.215828
OV (n=303)	T cell regulatory (Tregs)_XCELL	0.0779596	0.220252	0.367086
PRAD (n=498)	T cell regulatory (Tregs)_CIBERSORT	0.0196549	0.689367	0.801919
PRAD (n=498)	T cell regulatory (Tregs)_CIBERSORT-ABS	0.0399475	0.416422	0.559895
PRAD (n=498)	T cell regulatory (Tregs)_QUANTISEQ	0.200824	3.69e-05	0.000422218
PRAD (n=498)	T cell regulatory (Tregs)_XCELL	0.0712921	0.146626	0.289632
SKCM (n=471)	T cell regulatory (Tregs)_CIBERSORT	-0.213742	4.02e-06	5.85e-05
SKCM (n=471)	T cell regulatory (Tregs)_CIBERSORT-ABS	-0.0647577	0.166966	0.310634
SKCM (n=471)	T cell regulatory (Tregs)_QUANTISEQ	0.349194	1.5e-14	2.4e-12
SKCM (n=471)	T cell regulatory (Tregs)_XCELL	0.141173	0.00248765	0.0132675
SKCM-Metastasis (n=368)	T cell regulatory (Tregs)_CIBERSORT	-0.20582	9.59e-05	0.000902976
SKCM-Metastasis (n=368)	T cell regulatory (Tregs)_CIBERSORT-ABS	-0.0994952	0.061482	0.161264
SKCM-Metastasis (n=368)	T cell regulatory (Tregs)_QUANTISEQ	0.281991	6.79e-08	2.17e-06
SKCM-Metastasis (n=368)	T cell regulatory (Tregs)_XCELL	0.0988629	0.063159	0.162991
SKCM-Primary (n=103)	T cell regulatory (Tregs)_CIBERSORT	-0.321265	0.000993509	0.00588746
SKCM-Primary (n=103)	T cell regulatory (Tregs)_CIBERSORT-ABS	-0.163312	0.100991	0.229072
SKCM-Primary (n=103)	T cell regulatory (Tregs)_QUANTISEQ	0.439937	3.72e-06	5.85e-05
SKCM-Primary (n=103)	T cell regulatory (Tregs)_XCELL	0.207097	0.0367533	0.113087
STAD (n=415)	T cell regulatory (Tregs)_CIBERSORT	-0.143922	0.0049969	0.0235148
STAD (n=415)	T cell regulatory (Tregs)_CIBERSORT-ABS	-0.170652	0.000850615	0.00559434
STAD (n=415)	T cell regulatory (Tregs)_QUANTISEQ	-0.00138948	0.978491	0.986493
STAD (n=415)	T cell regulatory (Tregs)_XCELL	0.0606708	0.23867	0.389665
TGCT (n=150)	T cell regulatory (Tregs)_CIBERSORT	0.0190428	0.818922	0.885122
TGCT (n=150)	T cell regulatory (Tregs)_CIBERSORT-ABS	0.0870492	0.294456	0.444461
TGCT (n=150)	T cell regulatory (Tregs)_QUANTISEQ	0.155813	0.0594924	0.158646
TGCT (n=150)	T cell regulatory (Tregs)_XCELL	0.126549	0.126669	0.266671
THCA (n=509)	T cell regulatory (Tregs)_CIBERSORT	0.0883942	0.0509969	0.145705
THCA (n=509)	T cell regulatory (Tregs)_CIBERSORT-ABS	0.175658	9.59e-05	0.000902976
THCA (n=509)	T cell regulatory (Tregs)_QUANTISEQ	0.237886	1.05e-07	2.8e-06
THCA (n=509)	T cell regulatory (Tregs)_XCELL	0.163041	0.00029839	0.00217011
THYM (n=120)	T cell regulatory (Tregs)_CIBERSORT	0.284843	0.00203274	0.0112151
THYM (n=120)	T cell regulatory (Tregs)_CIBERSORT-ABS	0.180345	0.0537684	0.150929
THYM (n=120)	T cell regulatory (Tregs)_QUANTISEQ	-0.191807	0.0400203	0.118579
THYM (n=120)	T cell regulatory (Tregs)_XCELL	-0.0179491	0.849	0.899602
UCEC (n=545)	T cell regulatory (Tregs)_CIBERSORT	-0.158242	0.140884	0.281768
UCEC (n=545)	T cell regulatory (Tregs)_CIBERSORT-ABS	-0.0997196	0.355286	0.498647
UCEC (n=545)	T cell regulatory (Tregs)_QUANTISEQ	-0.183636	0.0867812	0.207239
UCEC (n=545)	T cell regulatory (Tregs)_XCELL	-0.12084	0.26208	0.415177
UCS (n=57)	T cell regulatory (Tregs)_CIBERSORT	-0.169222	0.225766	0.372397
UCS (n=57)	T cell regulatory (Tregs)_CIBERSORT-ABS	-0.102806	0.463841	0.608315
UCS (n=57)	T cell regulatory (Tregs)_QUANTISEQ	-0.0531553	0.705419	0.805142
UCS (n=57)	T cell regulatory (Tregs)_XCELL	-0.0676387	0.630355	0.764067
ACC (n=79)	T cell regulatory (Tregs)_CIBERSORT	-0.280708	0.0161477	0.0630156
ACC (n=79)	T cell regulatory (Tregs)_CIBERSORT-ABS	-0.253063	0.0307611	0.100444
ACC (n=79)	T cell regulatory (Tregs)_QUANTISEQ	0.150027	0.205194	0.356859
ACC (n=79)	T cell regulatory (Tregs)_XCELL	-0.000638909	0.99572	0.99572
BLCA (n=408)	T cell regulatory (Tregs)_CIBERSORT	-0.0570901	0.274682	0.422814
BLCA (n=408)	T cell regulatory (Tregs)_CIBERSORT-ABS	0.00800712	0.878333	0.920341
BLCA (n=408)	T cell regulatory (Tregs)_QUANTISEQ	0.172493	0.000891598	0.00559434
BLCA (n=408)	T cell regulatory (Tregs)_XCELL	0.152092	0.00344742	0.0172371
BRCA (n=1100)	T cell regulatory (Tregs)_CIBERSORT	-0.123655	9.28106e-05	0.000902976
BRCA (n=1100)	T cell regulatory (Tregs)_CIBERSORT-ABS	-0.087483	0.00578072	0.0264261
BRCA (n=1100)	T cell regulatory (Tregs)_QUANTISEQ	0.190518	1.40767e-09	1.12614e-07
BRCA (n=1100)	T cell regulatory (Tregs)_XCELL	0.157488	6.033e-07	1.2066e-05
BRCA-Basal (n=191)	T cell regulatory (Tregs)_CIBERSORT	-0.224098	0.00295239	0.0152382
BRCA-Basal (n=191)	T cell regulatory (Tregs)_CIBERSORT-ABS	-0.161736	0.0329966	0.105589
BRCA-Basal (n=191)	T cell regulatory (Tregs)_QUANTISEQ	0.134211	0.0774626	0.190677
BRCA-Basal (n=191)	T cell regulatory (Tregs)_XCELL	-0.0690764	0.365097	0.503582
BRCA-Her2 (n=82)	T cell regulatory (Tregs)_CIBERSORT	-0.184567	0.120647	0.264006
BRCA-Her2 (n=82)	T cell regulatory (Tregs)_CIBERSORT-ABS	-0.207548	0.0802249	0.194485
BRCA-Her2 (n=82)	T cell regulatory (Tregs)_QUANTISEQ	-0.0491087	0.682059	0.801919
BRCA-Her2 (n=82)	T cell regulatory (Tregs)_XCELL	0.233539	0.048341	0.140628
BRCA-LumA (n=568)	T cell regulatory (Tregs)_CIBERSORT	-0.0615935	0.161984	0.308542
BRCA-LumA (n=568)	T cell regulatory (Tregs)_CIBERSORT-ABS	-0.0238998	0.587689	0.729283
BRCA-LumA (n=568)	T cell regulatory (Tregs)_QUANTISEQ	0.246181	1.41518e-08	7.54761e-07
BRCA-LumA (n=568)	T cell regulatory (Tregs)_XCELL	0.240966	2.89455e-08	1.15782e-06
BRCA-LumB (n=219)	T cell regulatory (Tregs)_CIBERSORT	-0.237518	0.000909081	0.00559434
BRCA-LumB (n=219)	T cell regulatory (Tregs)_CIBERSORT-ABS	-0.178703	0.013138	0.0525522
BRCA-LumB (n=219)	T cell regulatory (Tregs)_QUANTISEQ	0.0231331	0.750112	0.835202
BRCA-LumB (n=219)	T cell regulatory (Tregs)_XCELL	0.0674433	0.352641	0.498647
COAD (n=458)	T cell regulatory (Tregs)_CIBERSORT	-0.125347	0.0377663	0.114011
COAD (n=458)	T cell regulatory (Tregs)_CIBERSORT-ABS	-0.0854574	0.157573	0.303755
COAD (n=458)	T cell regulatory (Tregs)_QUANTISEQ	-0.056605	0.349705	0.498647
COAD (n=458)	T cell regulatory (Tregs)_XCELL	-0.0091394	0.880076	0.920341
DLBC (n=48)	T cell regulatory (Tregs)_CIBERSORT	-0.245326	0.122103	0.264006
DLBC (n=48)	T cell regulatory (Tregs)_CIBERSORT-ABS	-0.17982	0.260587	0.415177
DLBC (n=48)	T cell regulatory (Tregs)_QUANTISEQ	-0.0202777	0.89986	0.928888
DLBC (n=48)	T cell regulatory (Tregs)_XCELL	0.198214	0.214122	0.364463
ESCA (n=185)	T cell regulatory (Tregs)_CIBERSORT	-0.103975	0.164826	0.31026
ESCA (n=185)	T cell regulatory (Tregs)_CIBERSORT-ABS	-0.11988	0.108949	0.242108
ESCA (n=185)	T cell regulatory (Tregs)_QUANTISEQ	0.0281167	0.707905	0.805142
ESCA (n=185)	T cell regulatory (Tregs)_XCELL	-0.0527648	0.481761	0.618992
GBM (n=153)	T cell regulatory (Tregs)_CIBERSORT	-0.0994145	0.247755	0.400411
GBM (n=153)	T cell regulatory (Tregs)_CIBERSORT-ABS	-0.0889592	0.301252	0.450471
GBM (n=153)	T cell regulatory (Tregs)_QUANTISEQ	0.315717	0.000171211	0.00144178
GBM (n=153)	T cell regulatory (Tregs)_XCELL	-0.0536353	0.533626	0.672284
HNSC (n=522)	T cell regulatory (Tregs)_CIBERSORT	-0.105215	0.019578	0.0711928
HNSC (n=522)	T cell regulatory (Tregs)_CIBERSORT-ABS	-0.0455706	0.31309	0.459582
HNSC (n=522)	T cell regulatory (Tregs)_QUANTISEQ	0.168655	0.000171017	0.00144178
HNSC (n=522)	T cell regulatory (Tregs)_XCELL	0.00971543	0.829802	0.885122
HNSC-HPV- (n=422)	T cell regulatory (Tregs)_CIBERSORT	-0.239407	1.27403e-06	2.26494e-05
HNSC-HPV- (n=422)	T cell regulatory (Tregs)_CIBERSORT-ABS	-0.184327	0.000209888	0.0016791
HNSC-HPV- (n=422)	T cell regulatory (Tregs)_QUANTISEQ	0.110722	0.026807	0.0893566
HNSC-HPV- (n=422)	T cell regulatory (Tregs)_XCELL	0.00236166	0.962445	0.980836
HNSC-HPV+ (n=98)	T cell regulatory (Tregs)_CIBERSORT	0.26673	0.0115138	0.0484791
HNSC-HPV+ (n=98)	T cell regulatory (Tregs)_CIBERSORT-ABS	0.250201	0.0180411	0.0684043
HNSC-HPV+ (n=98)	T cell regulatory (Tregs)_QUANTISEQ	0.140821	0.188076	0.338115
HNSC-HPV+ (n=98)	T cell regulatory (Tregs)_XCELL	-0.0234716	0.827172	0.885122
KICH (n=66)	T cell regulatory (Tregs)_CIBERSORT	0.171085	0.172996	0.318154
KICH (n=66)	T cell regulatory (Tregs)_CIBERSORT-ABS	0.237091	0.0572223	0.155179
KICH (n=66)	T cell regulatory (Tregs)_QUANTISEQ	0.155041	0.217501	0.366318
KICH (n=66)	T cell regulatory (Tregs)_XCELL	0.00311906	0.980327	0.986493
KIRC (n=533)	T cell regulatory (Tregs)_CIBERSORT	-0.157984	0.000663454	0.00461533
KIRC (n=533)	T cell regulatory (Tregs)_CIBERSORT-ABS	-0.105794	0.0231038	0.0806437
KIRC (n=533)	T cell regulatory (Tregs)_QUANTISEQ	-0.115458	0.0131174	0.0525522
KIRC (n=533)	T cell regulatory (Tregs)_XCELL	0.0445487	0.339892	0.489934
KIRP (n=290)	T cell regulatory (Tregs)_CIBERSORT	-0.104775	0.0930758	0.215828
KIRP (n=290)	T cell regulatory (Tregs)_CIBERSORT-ABS	-0.0450514	0.471227	0.612978
KIRP (n=290)	T cell regulatory (Tregs)_QUANTISEQ	0.0667074	0.285761	0.435446
KIRP (n=290)	T cell regulatory (Tregs)_XCELL	-0.0783507	0.209727	0.360821
LGG (n=516)	T cell regulatory (Tregs)_CIBERSORT	0.107811	0.0183837	0.0684043
LGG (n=516)	T cell regulatory (Tregs)_CIBERSORT-ABS	0.119792	0.00875096	0.0388931
LGG (n=516)	T cell regulatory (Tregs)_QUANTISEQ	0.195861	1.61209e-05	0.000198411
LGG (n=516)	T cell regulatory (Tregs)_XCELL	-0.103835	0.0231851	0.0806437
LIHC (n=371)	T cell regulatory (Tregs)_CIBERSORT	0.0982923	0.068229	0.17328
LIHC (n=371)	T cell regulatory (Tregs)_CIBERSORT-ABS	0.236065	9.35413e-06	0.000124722
LIHC (n=371)	T cell regulatory (Tregs)_QUANTISEQ	0.273402	2.49076e-07	5.69316e-06
LIHC (n=371)	T cell regulatory (Tregs)_XCELL	0.011705	0.828498	0.885122
LUAD (n=515)	T cell regulatory (Tregs)_CIBERSORT	-0.0678065	0.132721	0.271724
LUAD (n=515)	T cell regulatory (Tregs)_CIBERSORT-ABS	-0.0412583	0.36064	0.50176
LUAD (n=515)	T cell regulatory (Tregs)_QUANTISEQ	0.0587264	0.193001	0.339343
LUAD (n=515)	T cell regulatory (Tregs)_XCELL	0.0386884	0.391355	0.530651
LUSC (n=501)	T cell regulatory (Tregs)_CIBERSORT	-0.0408953	0.372823	0.509844
LUSC (n=501)	T cell regulatory (Tregs)_CIBERSORT-ABS	-0.0248669	0.587984	0.729283
LUSC (n=501)	T cell regulatory (Tregs)_QUANTISEQ	0.0818006	0.0742845	0.185711
LUSC (n=501)	T cell regulatory (Tregs)_XCELL	0.0500997	0.274829	0.422814
OV (n=303)	T cell regulatory (Tregs)_CIBERSORT	0.0828163	0.192752	0.339343
OV (n=303)	T cell regulatory (Tregs)_CIBERSORT-ABS	0.133293	0.0355415	0.111503
OV (n=303)	T cell regulatory (Tregs)_QUANTISEQ	0.107026	0.0919526	0.215828
OV (n=303)	T cell regulatory (Tregs)_XCELL	0.0779596	0.220252	0.367086
PRAD (n=498)	T cell regulatory (Tregs)_CIBERSORT	0.0196549	0.689367	0.801919
PRAD (n=498)	T cell regulatory (Tregs)_CIBERSORT-ABS	0.0399475	0.416422	0.559895
PRAD (n=498)	T cell regulatory (Tregs)_QUANTISEQ	0.200824	3.69441e-05	0.000422218
PRAD (n=498)	T cell regulatory (Tregs)_XCELL	0.0712921	0.146626	0.289632
SKCM (n=471)	T cell regulatory (Tregs)_CIBERSORT	-0.213742	4.02379e-06	5.85278e-05
SKCM (n=471)	T cell regulatory (Tregs)_CIBERSORT-ABS	-0.0647577	0.166966	0.310634
SKCM (n=471)	T cell regulatory (Tregs)_QUANTISEQ	0.349194	1.49695e-14	2.39512e-12
SKCM (n=471)	T cell regulatory (Tregs)_XCELL	0.141173	0.00248765	0.0132675
SKCM-Metastasis (n=368)	T cell regulatory (Tregs)_CIBERSORT	-0.20582	9.59412e-05	0.000902976
SKCM-Metastasis (n=368)	T cell regulatory (Tregs)_CIBERSORT-ABS	-0.0994952	0.061482	0.161264
SKCM-Metastasis (n=368)	T cell regulatory (Tregs)_QUANTISEQ	0.281991	6.78516e-08	2.17125e-06
SKCM-Metastasis (n=368)	T cell regulatory (Tregs)_XCELL	0.0988629	0.063159	0.162991
SKCM-Primary (n=103)	T cell regulatory (Tregs)_CIBERSORT	-0.321265	0.000993509	0.00588746
SKCM-Primary (n=103)	T cell regulatory (Tregs)_CIBERSORT-ABS	-0.163312	0.100991	0.229072
SKCM-Primary (n=103)	T cell regulatory (Tregs)_QUANTISEQ	0.439937	3.71751e-06	5.85278e-05
SKCM-Primary (n=103)	T cell regulatory (Tregs)_XCELL	0.207097	0.0367533	0.113087
STAD (n=415)	T cell regulatory (Tregs)_CIBERSORT	-0.143922	0.0049969	0.0235148
STAD (n=415)	T cell regulatory (Tregs)_CIBERSORT-ABS	-0.170652	0.000850615	0.00559434
STAD (n=415)	T cell regulatory (Tregs)_QUANTISEQ	-0.00138948	0.978491	0.986493
STAD (n=415)	T cell regulatory (Tregs)_XCELL	0.0606708	0.23867	0.389665
TGCT (n=150)	T cell regulatory (Tregs)_CIBERSORT	0.0190428	0.818922	0.885122
TGCT (n=150)	T cell regulatory (Tregs)_CIBERSORT-ABS	0.0870492	0.294456	0.444461
TGCT (n=150)	T cell regulatory (Tregs)_QUANTISEQ	0.155813	0.0594924	0.158646
TGCT (n=150)	T cell regulatory (Tregs)_XCELL	0.126549	0.126669	0.266671
THCA (n=509)	T cell regulatory (Tregs)_CIBERSORT	0.0883942	0.0509969	0.145705
THCA (n=509)	T cell regulatory (Tregs)_CIBERSORT-ABS	0.175658	9.58626e-05	0.000902976
THCA (n=509)	T cell regulatory (Tregs)_QUANTISEQ	0.237886	1.04839e-07	2.7957e-06
THCA (n=509)	T cell regulatory (Tregs)_XCELL	0.163041	0.00029839	0.00217011
THYM (n=120)	T cell regulatory (Tregs)_CIBERSORT	0.284843	0.00203274	0.0112151
THYM (n=120)	T cell regulatory (Tregs)_CIBERSORT-ABS	0.180345	0.0537684	0.150929
THYM (n=120)	T cell regulatory (Tregs)_QUANTISEQ	-0.191807	0.0400203	0.118579
THYM (n=120)	T cell regulatory (Tregs)_XCELL	-0.0179491	0.849	0.899602
UCEC (n=545)	T cell regulatory (Tregs)_CIBERSORT	-0.158242	0.140884	0.281768
UCEC (n=545)	T cell regulatory (Tregs)_CIBERSORT-ABS	-0.0997196	0.355286	0.498647
UCEC (n=545)	T cell regulatory (Tregs)_QUANTISEQ	-0.183636	0.0867812	0.207239
UCEC (n=545)	T cell regulatory (Tregs)_XCELL	-0.12084	0.26208	0.415177
UCS (n=57)	T cell regulatory (Tregs)_CIBERSORT	-0.169222	0.225766	0.372397
UCS (n=57)	T cell regulatory (Tregs)_CIBERSORT-ABS	-0.102806	0.463841	0.608315
UCS (n=57)	T cell regulatory (Tregs)_QUANTISEQ	-0.0531553	0.705419	0.805142
UCS (n=57)	T cell regulatory (Tregs)_XCELL	-0.0676387	0.630355	0.764067
ACC (n=79)	Cancer associated fibroblast_EPIC	-0.0129235	0.913586	0.993927
ACC (n=79)	Cancer associated fibroblast_MCPCOUNTER	0.169667	0.151275	0.263086
ACC (n=79)	Cancer associated fibroblast_TIDE	0.272662	0.0196047	0.065349
ACC (n=79)	Cancer associated fibroblast_XCELL	0.0251111	0.832981	0.979451
BLCA (n=408)	Cancer associated fibroblast_EPIC	0.112683	0.0306821	0.0819802
BLCA (n=408)	Cancer associated fibroblast_MCPCOUNTER	0.147536	0.00456625	0.0228313
BLCA (n=408)	Cancer associated fibroblast_TIDE	0.197738	0.000134464	0.00119524
BLCA (n=408)	Cancer associated fibroblast_XCELL	-0.0946912	0.0696175	0.146563
BRCA (n=1100)	Cancer associated fibroblast_EPIC	0.251873	7.54848e-16	1.20776e-13
BRCA (n=1100)	Cancer associated fibroblast_MCPCOUNTER	0.212604	1.26971e-11	4.06308e-10
BRCA (n=1100)	Cancer associated fibroblast_TIDE	0.23888	2.30008e-14	1.84006e-12
BRCA (n=1100)	Cancer associated fibroblast_XCELL	-0.00210737	0.947093	0.993927
BRCA-Basal (n=191)	Cancer associated fibroblast_EPIC	0.224895	0.00284968	0.0157224
BRCA-Basal (n=191)	Cancer associated fibroblast_MCPCOUNTER	0.166006	0.0285828	0.0812405
BRCA-Basal (n=191)	Cancer associated fibroblast_TIDE	0.259315	0.000549804	0.00366536
BRCA-Basal (n=191)	Cancer associated fibroblast_XCELL	0.086306	0.257482	0.396126
BRCA-Her2 (n=82)	Cancer associated fibroblast_EPIC	0.18785	0.114069	0.217275
BRCA-Her2 (n=82)	Cancer associated fibroblast_MCPCOUNTER	0.188927	0.111972	0.215849
BRCA-Her2 (n=82)	Cancer associated fibroblast_TIDE	0.275926	0.0189724	0.0645869
BRCA-Her2 (n=82)	Cancer associated fibroblast_XCELL	-0.0952745	0.425976	0.609342
BRCA-LumA (n=568)	Cancer associated fibroblast_EPIC	0.24172	2.61295e-08	5.97245e-07
BRCA-LumA (n=568)	Cancer associated fibroblast_MCPCOUNTER	0.220805	3.95396e-07	6.32633e-06
BRCA-LumA (n=568)	Cancer associated fibroblast_TIDE	0.279344	1.01032e-10	2.69418e-09
BRCA-LumA (n=568)	Cancer associated fibroblast_XCELL	-0.0089936	0.838352	0.979451
BRCA-LumB (n=219)	Cancer associated fibroblast_EPIC	0.197931	0.00592366	0.0270796
BRCA-LumB (n=219)	Cancer associated fibroblast_MCPCOUNTER	0.194371	0.00690254	0.0290633
BRCA-LumB (n=219)	Cancer associated fibroblast_TIDE	0.189159	0.00859604	0.0335455
BRCA-LumB (n=219)	Cancer associated fibroblast_XCELL	-0.0324979	0.654528	0.837795
COAD (n=458)	Cancer associated fibroblast_EPIC	0.0848932	0.160344	0.270052
COAD (n=458)	Cancer associated fibroblast_MCPCOUNTER	0.0813232	0.178729	0.294811
COAD (n=458)	Cancer associated fibroblast_TIDE	0.056397	0.256892	0.396126
COAD (n=458)	Cancer associated fibroblast_XCELL	0.0481395	0.426539	0.609342
DLBC (n=48)	Cancer associated fibroblast_EPIC	0.223889	0.159371	0.270052
DLBC (n=48)	Cancer associated fibroblast_MCPCOUNTER	0.344657	0.0273321	0.0809841
DLBC (n=48)	Cancer associated fibroblast_TIDE	0.242298	0.126927	0.235567
DLBC (n=48)	Cancer associated fibroblast_XCELL	0.0099929	0.950556	0.993927
ESCA (n=185)	Cancer associated fibroblast_EPIC	0.0311105	0.678447	0.854736
ESCA (n=185)	Cancer associated fibroblast_MCPCOUNTER	0.0101351	0.892585	0.991762
ESCA (n=185)	Cancer associated fibroblast_TIDE	-0.028531	0.703801	0.879751
ESCA (n=185)	Cancer associated fibroblast_XCELL	-0.169257	0.0231219	0.0725392
GBM (n=153)	Cancer associated fibroblast_EPIC	-0.0266762	0.756994	0.931685
GBM (n=153)	Cancer associated fibroblast_MCPCOUNTER	-0.0241516	0.779372	0.944693
GBM (n=153)	Cancer associated fibroblast_TIDE	-0.0858842	0.318336	0.465035
GBM (n=153)	Cancer associated fibroblast_XCELL	-0.127574	0.137382	0.244235
HNSC (n=522)	Cancer associated fibroblast_EPIC	0.0617492	0.171473	0.285789
HNSC (n=522)	Cancer associated fibroblast_MCPCOUNTER	0.0767911	0.0888512	0.177702
HNSC (n=522)	Cancer associated fibroblast_TIDE	0.0686962	0.12809	0.235567
HNSC (n=522)	Cancer associated fibroblast_XCELL	0.0315226	0.485427	0.669554
HNSC-HPV- (n=422)	Cancer associated fibroblast_EPIC	0.115164	0.0212376	0.0693474
HNSC-HPV- (n=422)	Cancer associated fibroblast_MCPCOUNTER	0.127692	0.0105785	0.0384672
HNSC-HPV- (n=422)	Cancer associated fibroblast_TIDE	0.160892	0.00124294	0.0073656
HNSC-HPV- (n=422)	Cancer associated fibroblast_XCELL	0.00828624	0.868779	0.979451
HNSC-HPV+ (n=98)	Cancer associated fibroblast_EPIC	-0.0533366	0.6196	0.799484
HNSC-HPV+ (n=98)	Cancer associated fibroblast_MCPCOUNTER	-0.0204967	0.848798	0.979451
HNSC-HPV+ (n=98)	Cancer associated fibroblast_TIDE	-0.0534171	0.619071	0.799484
HNSC-HPV+ (n=98)	Cancer associated fibroblast_XCELL	0.0217811	0.839446	0.979451
KICH (n=66)	Cancer associated fibroblast_EPIC	0.354334	0.0037808	0.0201643
KICH (n=66)	Cancer associated fibroblast_MCPCOUNTER	0.0924151	0.464055	0.651305
KICH (n=66)	Cancer associated fibroblast_TIDE	0.369936	0.00242107	0.0138347
KICH (n=66)	Cancer associated fibroblast_XCELL	0.0260196	0.836993	0.979451
KIRC (n=533)	Cancer associated fibroblast_EPIC	-0.100637	0.0307426	0.0819802
KIRC (n=533)	Cancer associated fibroblast_MCPCOUNTER	-0.121535	0.00899967	0.0342845
KIRC (n=533)	Cancer associated fibroblast_TIDE	-0.0922517	0.0477516	0.110728
KIRC (n=533)	Cancer associated fibroblast_XCELL	-0.0822188	0.077815	0.159621
KIRP (n=290)	Cancer associated fibroblast_EPIC	-0.0449309	0.472415	0.657273
KIRP (n=290)	Cancer associated fibroblast_MCPCOUNTER	0.0887686	0.155108	0.266852
KIRP (n=290)	Cancer associated fibroblast_TIDE	0.253246	3.86739e-05	0.000441987
KIRP (n=290)	Cancer associated fibroblast_XCELL	-0.169752	0.00627126	0.0278723
LGG (n=516)	Cancer associated fibroblast_EPIC	-0.00131057	0.977201	0.993927
LGG (n=516)	Cancer associated fibroblast_MCPCOUNTER	0.0261993	0.567729	0.750716
LGG (n=516)	Cancer associated fibroblast_TIDE	0.0564114	0.218291	0.345807
LGG (n=516)	Cancer associated fibroblast_XCELL	0.192989	2.15383e-05	0.000265087
LIHC (n=371)	Cancer associated fibroblast_EPIC	0.265606	5.56573e-07	7.42098e-06
LIHC (n=371)	Cancer associated fibroblast_MCPCOUNTER	0.188569	0.000429215	0.00298585
LIHC (n=371)	Cancer associated fibroblast_TIDE	0.105772	0.0496455	0.111877
LIHC (n=371)	Cancer associated fibroblast_XCELL	-0.0560331	0.29936	0.447641
LUAD (n=515)	Cancer associated fibroblast_EPIC	0.223809	5.15156e-07	7.42098e-06
LUAD (n=515)	Cancer associated fibroblast_MCPCOUNTER	0.233833	1.5068e-07	2.67875e-06
LUAD (n=515)	Cancer associated fibroblast_TIDE	0.172868	0.000114494	0.00112516
LUAD (n=515)	Cancer associated fibroblast_XCELL	-0.0776564	0.0849834	0.172118
LUSC (n=501)	Cancer associated fibroblast_EPIC	0.0564826	0.218194	0.345807
LUSC (n=501)	Cancer associated fibroblast_MCPCOUNTER	0.0716904	0.117901	0.221931
LUSC (n=501)	Cancer associated fibroblast_TIDE	0.111981	0.0144057	0.0512202
LUSC (n=501)	Cancer associated fibroblast_XCELL	-0.0350888	0.444524	0.629414
OV (n=303)	Cancer associated fibroblast_EPIC	0.122705	0.0531341	0.116458
OV (n=303)	Cancer associated fibroblast_MCPCOUNTER	0.0955521	0.132673	0.241224
OV (n=303)	Cancer associated fibroblast_TIDE	0.126826	0.0455765	0.107239
OV (n=303)	Cancer associated fibroblast_XCELL	-0.0108214	0.865085	0.979451
PRAD (n=498)	Cancer associated fibroblast_EPIC	0.139249	0.00443479	0.0228313
PRAD (n=498)	Cancer associated fibroblast_MCPCOUNTER	0.0826474	0.09228	0.182282
PRAD (n=498)	Cancer associated fibroblast_TIDE	0.101109	0.0392737	0.0981843
PRAD (n=498)	Cancer associated fibroblast_XCELL	-0.104751	0.0326818	0.0854663
SKCM (n=471)	Cancer associated fibroblast_EPIC	0.120079	0.0101916	0.0379221
SKCM (n=471)	Cancer associated fibroblast_MCPCOUNTER	0.102188	0.0289419	0.0812405
SKCM (n=471)	Cancer associated fibroblast_TIDE	0.150717	0.00123091	0.0073656
SKCM (n=471)	Cancer associated fibroblast_XCELL	0.00379021	0.935598	0.993927
SKCM-Metastasis (n=368)	Cancer associated fibroblast_EPIC	0.144339	0.00652067	0.0281975
SKCM-Metastasis (n=368)	Cancer associated fibroblast_MCPCOUNTER	0.140912	0.00792785	0.0317114
SKCM-Metastasis (n=368)	Cancer associated fibroblast_TIDE	0.147726	0.00535435	0.0251969
SKCM-Metastasis (n=368)	Cancer associated fibroblast_XCELL	-0.0360628	0.498826	0.682155
SKCM-Primary (n=103)	Cancer associated fibroblast_EPIC	0.0530107	0.596697	0.782554
SKCM-Primary (n=103)	Cancer associated fibroblast_MCPCOUNTER	0.00137073	0.989091	0.994572
SKCM-Primary (n=103)	Cancer associated fibroblast_TIDE	0.2194	0.0267198	0.0806637
SKCM-Primary (n=103)	Cancer associated fibroblast_XCELL	-0.00786152	0.937494	0.993927
STAD (n=415)	Cancer associated fibroblast_EPIC	0.0144851	0.778651	0.944693
STAD (n=415)	Cancer associated fibroblast_MCPCOUNTER	-0.0540254	0.294153	0.444005
STAD (n=415)	Cancer associated fibroblast_TIDE	-0.0678451	0.187517	0.306151
STAD (n=415)	Cancer associated fibroblast_XCELL	-0.18387	0.000320085	0.00237317
TGCT (n=150)	Cancer associated fibroblast_EPIC	-0.156484	0.0583916	0.126252
TGCT (n=150)	Cancer associated fibroblast_MCPCOUNTER	-0.185788	0.0242605	0.0746478
TGCT (n=150)	Cancer associated fibroblast_TIDE	-0.175862	0.0331182	0.0854663
TGCT (n=150)	Cancer associated fibroblast_XCELL	-0.230032	0.00506499	0.0245575
THCA (n=509)	Cancer associated fibroblast_EPIC	0.331574	5.49087e-14	2.92846e-12
THCA (n=509)	Cancer associated fibroblast_MCPCOUNTER	0.245601	3.88507e-08	7.77015e-07
THCA (n=509)	Cancer associated fibroblast_TIDE	0.313743	1.31324e-12	5.25295e-11
THCA (n=509)	Cancer associated fibroblast_XCELL	-0.0466053	0.304202	0.45067
THYM (n=120)	Cancer associated fibroblast_EPIC	-0.16719	0.074112	0.153999
THYM (n=120)	Cancer associated fibroblast_MCPCOUNTER	-0.351086	0.000119548	0.00112516
THYM (n=120)	Cancer associated fibroblast_TIDE	-0.329293	0.000326311	0.00237317
THYM (n=120)	Cancer associated fibroblast_XCELL	-0.33047	0.000309667	0.00237317
UCEC (n=545)	Cancer associated fibroblast_EPIC	0.00942446	0.930555	0.993927
UCEC (n=545)	Cancer associated fibroblast_MCPCOUNTER	0.0347172	0.748122	0.927904
UCEC (n=545)	Cancer associated fibroblast_TIDE	-0.00136029	0.981503	0.993927
UCEC (n=545)	Cancer associated fibroblast_XCELL	-0.216562	0.0427028	0.101977
UCS (n=57)	Cancer associated fibroblast_EPIC	-0.139335	0.319711	0.465035
UCS (n=57)	Cancer associated fibroblast_MCPCOUNTER	-0.0810309	0.564077	0.750716
UCS (n=57)	Cancer associated fibroblast_TIDE	-0.023158	0.869263	0.979451
UCS (n=57)	Cancer associated fibroblast_XCELL	-0.170385	0.222545	0.349091
ACC (n=79)	Macrophage M0_CIBERSORT	-0.0694985	0.55905	0.747164
ACC (n=79)	Macrophage M0_CIBERSORT-ABS	-0.0631946	0.595317	0.780484
ACC (n=79)	Macrophage M1_CIBERSORT	0.104256	0.380061	0.581726
ACC (n=79)	Macrophage M1_CIBERSORT-ABS	0.123693	0.297133	0.488438
ACC (n=79)	Macrophage M1_QUANTISEQ	-0.0174702	0.883368	0.946466
ACC (n=79)	Macrophage M1_XCELL	-0.243372	0.0380059	0.105595
ACC (n=79)	Macrophage M2_CIBERSORT	0.178275	0.131297	0.275448
ACC (n=79)	Macrophage M2_CIBERSORT-ABS	0.178014	0.131872	0.27569
ACC (n=79)	Macrophage M2_QUANTISEQ	0.0215548	0.856362	0.927468
ACC (n=79)	Macrophage M2_TIDE	-0.040732	0.732238	0.869986
ACC (n=79)	Macrophage M2_XCELL	-0.226487	0.0540017	0.137292
ACC (n=79)	Macrophage_EPIC	-0.225338	0.055265	0.139911
ACC (n=79)	Macrophage_TIMER	0.0809278	0.496105	0.689035
ACC (n=79)	Macrophage_XCELL	-0.23582	0.0445912	0.120517
ACC (n=79)	Macrophage/Monocyte_MCPCOUNTER	0.128019	0.280425	0.468677
BLCA (n=408)	Macrophage M0_CIBERSORT	0.119162	0.0222372	0.0702226
BLCA (n=408)	Macrophage M0_CIBERSORT-ABS	0.133918	0.0101157	0.0359209
BLCA (n=408)	Macrophage M1_CIBERSORT	0.132319	0.0110578	0.038269
BLCA (n=408)	Macrophage M1_CIBERSORT-ABS	0.148399	0.00433216	0.0174449
BLCA (n=408)	Macrophage M1_QUANTISEQ	0.306917	1.81663e-09	4.35991e-08
BLCA (n=408)	Macrophage M1_XCELL	0.160385	0.00202699	0.00928393
BLCA (n=408)	Macrophage M2_CIBERSORT	0.0520621	0.319249	0.51382
BLCA (n=408)	Macrophage M2_CIBERSORT-ABS	0.175573	0.000717164	0.00387656
BLCA (n=408)	Macrophage M2_QUANTISEQ	0.0447789	0.391713	0.595006
BLCA (n=408)	Macrophage M2_TIDE	-0.334105	4.78742e-11	1.79528e-09
BLCA (n=408)	Macrophage M2_XCELL	0.0857027	0.100696	0.222942
BLCA (n=408)	Macrophage_EPIC	0.177793	0.000611636	0.00336681
BLCA (n=408)	Macrophage_TIMER	0.127976	0.0140192	0.0469916
BLCA (n=408)	Macrophage_XCELL	0.212612	3.92537e-05	0.000322633
BLCA (n=408)	Macrophage/Monocyte_MCPCOUNTER	0.352877	3.12777e-12	1.44358e-10
BRCA (n=1100)	Macrophage M0_CIBERSORT	-0.00333204	0.916439	0.96807
BRCA (n=1100)	Macrophage M0_CIBERSORT-ABS	0.0145463	0.64691	0.812799
BRCA (n=1100)	Macrophage M1_CIBERSORT	0.0417434	0.188512	0.360213
BRCA (n=1100)	Macrophage M1_CIBERSORT-ABS	0.0763328	0.0160804	0.0519605
BRCA (n=1100)	Macrophage M1_QUANTISEQ	0.260219	7.56522e-17	1.51304e-14
BRCA (n=1100)	Macrophage M1_XCELL	-0.0231416	0.466135	0.667497
BRCA (n=1100)	Macrophage M2_CIBERSORT	0.172738	4.24274e-08	7.31071e-07
BRCA (n=1100)	Macrophage M2_CIBERSORT-ABS	0.254861	3.34436e-16	5.01654e-14
BRCA (n=1100)	Macrophage M2_QUANTISEQ	0.173785	3.50453e-08	6.37187e-07
BRCA (n=1100)	Macrophage M2_TIDE	-0.142893	6.1073e-06	6.66251e-05
BRCA (n=1100)	Macrophage M2_XCELL	0.145276	4.24761e-06	4.80861e-05
BRCA (n=1100)	Macrophage_EPIC	0.0466461	0.141671	0.291104
BRCA (n=1100)	Macrophage_TIMER	0.313341	4.39024e-24	2.63414e-21
BRCA (n=1100)	Macrophage_XCELL	0.12596	6.83058e-05	0.000532253
BRCA (n=1100)	Macrophage/Monocyte_MCPCOUNTER	0.222368	1.33232e-12	6.66161e-11
BRCA-Basal (n=191)	Macrophage M0_CIBERSORT	0.0274443	0.719241	0.862478
BRCA-Basal (n=191)	Macrophage M0_CIBERSORT-ABS	0.105203	0.167109	0.329632
BRCA-Basal (n=191)	Macrophage M1_CIBERSORT	0.0854647	0.262167	0.452012
BRCA-Basal (n=191)	Macrophage M1_CIBERSORT-ABS	0.160862	0.0339685	0.0975173
BRCA-Basal (n=191)	Macrophage M1_QUANTISEQ	0.274586	0.00024573	0.00155414
BRCA-Basal (n=191)	Macrophage M1_XCELL	0.0550013	0.471012	0.670494
BRCA-Basal (n=191)	Macrophage M2_CIBERSORT	0.148598	0.0503597	0.130805
BRCA-Basal (n=191)	Macrophage M2_CIBERSORT-ABS	0.279801	0.000184612	0.00127319
BRCA-Basal (n=191)	Macrophage M2_QUANTISEQ	0.119631	0.115877	0.247425
BRCA-Basal (n=191)	Macrophage M2_TIDE	-0.218547	0.00376562	0.0154752
BRCA-Basal (n=191)	Macrophage M2_XCELL	0.0344814	0.651487	0.81327
BRCA-Basal (n=191)	Macrophage_EPIC	0.01974	0.795993	0.907627
BRCA-Basal (n=191)	Macrophage_TIMER	0.113491	0.135941	0.282231
BRCA-Basal (n=191)	Macrophage_XCELL	0.0887052	0.244438	0.430097
BRCA-Basal (n=191)	Macrophage/Monocyte_MCPCOUNTER	0.317241	1.99698e-05	0.00017365
BRCA-Her2 (n=82)	Macrophage M0_CIBERSORT	0.0571344	0.633571	0.807097
BRCA-Her2 (n=82)	Macrophage M0_CIBERSORT-ABS	-0.00991708	0.934107	0.975964
BRCA-Her2 (n=82)	Macrophage M1_CIBERSORT	0.0518948	0.665068	0.822764
BRCA-Her2 (n=82)	Macrophage M1_CIBERSORT-ABS	-0.151017	0.205415	0.383952
BRCA-Her2 (n=82)	Macrophage M1_QUANTISEQ	0.111938	0.349195	0.548101
BRCA-Her2 (n=82)	Macrophage M1_XCELL	-0.129422	0.278576	0.466887
BRCA-Her2 (n=82)	Macrophage M2_CIBERSORT	0.23663	0.0453656	0.12206
BRCA-Her2 (n=82)	Macrophage M2_CIBERSORT-ABS	0.0528665	0.659181	0.820557
BRCA-Her2 (n=82)	Macrophage M2_QUANTISEQ	-0.0282526	0.813757	0.914891
BRCA-Her2 (n=82)	Macrophage M2_TIDE	-0.0118262	0.921459	0.971068
BRCA-Her2 (n=82)	Macrophage M2_XCELL	0.0540611	0.651971	0.81327
BRCA-Her2 (n=82)	Macrophage_EPIC	-0.12614	0.29105	0.483739
BRCA-Her2 (n=82)	Macrophage_TIMER	0.409505	0.000354333	0.00209468
BRCA-Her2 (n=82)	Macrophage_XCELL	0.00791521	0.947387	0.983447
BRCA-Her2 (n=82)	Macrophage/Monocyte_MCPCOUNTER	0.0234267	0.845135	0.923645
BRCA-LumA (n=568)	Macrophage M0_CIBERSORT	0.0605349	0.169333	0.332026
BRCA-LumA (n=568)	Macrophage M0_CIBERSORT-ABS	0.0897566	0.0413472	0.11328
BRCA-LumA (n=568)	Macrophage M1_CIBERSORT	0.0356722	0.418287	0.618158
BRCA-LumA (n=568)	Macrophage M1_CIBERSORT-ABS	0.105795	0.0161077	0.0519605
BRCA-LumA (n=568)	Macrophage M1_QUANTISEQ	0.356184	6.5579e-17	1.51304e-14
BRCA-LumA (n=568)	Macrophage M1_XCELL	-0.00889998	0.840012	0.92309
BRCA-LumA (n=568)	Macrophage M2_CIBERSORT	0.0950492	0.0307063	0.0903127
BRCA-LumA (n=568)	Macrophage M2_CIBERSORT-ABS	0.25584	3.59978e-09	7.99952e-08
BRCA-LumA (n=568)	Macrophage M2_QUANTISEQ	0.145347	0.000918192	0.00470868
BRCA-LumA (n=568)	Macrophage M2_TIDE	-0.212662	1.06273e-06	1.41698e-05
BRCA-LumA (n=568)	Macrophage M2_XCELL	0.0757405	0.0853483	0.195454
BRCA-LumA (n=568)	Macrophage_EPIC	0.0600952	0.172458	0.337052
BRCA-LumA (n=568)	Macrophage_TIMER	0.323683	4.48653e-14	2.69192e-12
BRCA-LumA (n=568)	Macrophage_XCELL	0.135037	0.00209023	0.00950105
BRCA-LumA (n=568)	Macrophage/Monocyte_MCPCOUNTER	0.277862	1.27876e-10	4.26254e-09
BRCA-LumB (n=219)	Macrophage M0_CIBERSORT	-0.060666	0.403214	0.605109
BRCA-LumB (n=219)	Macrophage M0_CIBERSORT-ABS	-0.0153508	0.832629	0.920032
BRCA-LumB (n=219)	Macrophage M1_CIBERSORT	0.00116137	0.987245	0.992206
BRCA-LumB (n=219)	Macrophage M1_CIBERSORT-ABS	0.044982	0.535565	0.727012
BRCA-LumB (n=219)	Macrophage M1_QUANTISEQ	0.195636	0.00653933	0.0246767
BRCA-LumB (n=219)	Macrophage M1_XCELL	-0.0252204	0.728413	0.868285
BRCA-LumB (n=219)	Macrophage M2_CIBERSORT	0.130471	0.0712663	0.168346
BRCA-LumB (n=219)	Macrophage M2_CIBERSORT-ABS	0.185616	0.00994845	0.0358975
BRCA-LumB (n=219)	Macrophage M2_QUANTISEQ	0.0424145	0.559128	0.747164
BRCA-LumB (n=219)	Macrophage M2_TIDE	-0.159321	0.0272918	0.0831222
BRCA-LumB (n=219)	Macrophage M2_XCELL	0.131114	0.0698711	0.165941
BRCA-LumB (n=219)	Macrophage_EPIC	0.0458202	0.527983	0.719976
BRCA-LumB (n=219)	Macrophage_TIMER	0.262507	0.000234731	0.0015356
BRCA-LumB (n=219)	Macrophage_XCELL	0.0859197	0.236034	0.422343
BRCA-LumB (n=219)	Macrophage/Monocyte_MCPCOUNTER	0.281485	7.64778e-05	0.000577571
COAD (n=458)	Macrophage M0_CIBERSORT	0.027916	0.644859	0.812799
COAD (n=458)	Macrophage M0_CIBERSORT-ABS	0.049149	0.416894	0.618158
COAD (n=458)	Macrophage M1_CIBERSORT	0.0327463	0.588709	0.77632
COAD (n=458)	Macrophage M1_CIBERSORT-ABS	0.0311491	0.607027	0.791775
COAD (n=458)	Macrophage M1_QUANTISEQ	0.0231407	0.702426	0.850168
COAD (n=458)	Macrophage M1_XCELL	0.0281187	0.642459	0.812799
COAD (n=458)	Macrophage M2_CIBERSORT	0.0978018	0.105586	0.23037
COAD (n=458)	Macrophage M2_CIBERSORT-ABS	0.0619094	0.306329	0.496749
COAD (n=458)	Macrophage M2_QUANTISEQ	-0.031605	0.601773	0.786631
COAD (n=458)	Macrophage M2_TIDE	-0.0882657	0.0756522	0.17731
COAD (n=458)	Macrophage M2_XCELL	0.116745	0.0531389	0.135674
COAD (n=458)	Macrophage_EPIC	-0.0132002	0.827497	0.917742
COAD (n=458)	Macrophage_TIMER	0.105106	0.0818831	0.189506
COAD (n=458)	Macrophage_XCELL	0.0552801	0.361116	0.562779
COAD (n=458)	Macrophage/Monocyte_MCPCOUNTER	0.0306302	0.613032	0.794286
DLBC (n=48)	Macrophage M0_CIBERSORT	-0.0919576	0.567444	0.756591
DLBC (n=48)	Macrophage M0_CIBERSORT-ABS	0.0315975	0.84452	0.923645
DLBC (n=48)	Macrophage M1_CIBERSORT	0.056276	0.726732	0.868285
DLBC (n=48)	Macrophage M1_CIBERSORT-ABS	0.105562	0.511269	0.703581
DLBC (n=48)	Macrophage M1_QUANTISEQ	0.130015	0.417825	0.618158
DLBC (n=48)	Macrophage M1_XCELL	0.101921	0.526026	0.718943
DLBC (n=48)	Macrophage M2_CIBERSORT	-0.00764506	0.962163	0.985486
DLBC (n=48)	Macrophage M2_CIBERSORT-ABS	0.118373	0.461054	0.663387
DLBC (n=48)	Macrophage M2_QUANTISEQ	0.064453	0.688895	0.8422
DLBC (n=48)	Macrophage M2_TIDE	-0.220543	0.165863	0.328441
DLBC (n=48)	Macrophage M2_XCELL	-0.0438316	0.785537	0.905679
DLBC (n=48)	Macrophage_EPIC	-0.0130822	0.935299	0.975964
DLBC (n=48)	Macrophage_TIMER	0.0251636	0.875901	0.940144
DLBC (n=48)	Macrophage_XCELL	0.165813	0.300165	0.492073
DLBC (n=48)	Macrophage/Monocyte_MCPCOUNTER	0.212865	0.181476	0.351245
ESCA (n=185)	Macrophage M0_CIBERSORT	0.0820875	0.273299	0.46356
ESCA (n=185)	Macrophage M0_CIBERSORT-ABS	0.0787289	0.293474	0.485857
ESCA (n=185)	Macrophage M1_CIBERSORT	0.00265501	0.971783	0.985486
ESCA (n=185)	Macrophage M1_CIBERSORT-ABS	0.0151757	0.839763	0.92309
ESCA (n=185)	Macrophage M1_QUANTISEQ	0.191023	0.0102084	0.0359209
ESCA (n=185)	Macrophage M1_XCELL	-0.00252709	0.973142	0.985486
ESCA (n=185)	Macrophage M2_CIBERSORT	-0.0984889	0.188388	0.360213
ESCA (n=185)	Macrophage M2_CIBERSORT-ABS	-0.0919219	0.219721	0.401929
ESCA (n=185)	Macrophage M2_QUANTISEQ	-0.203896	0.00604383	0.0232455
ESCA (n=185)	Macrophage M2_TIDE	-0.0897029	0.231103	0.418918
ESCA (n=185)	Macrophage M2_XCELL	0.0732147	0.328695	0.525912
ESCA (n=185)	Macrophage_EPIC	0.0268835	0.720169	0.862478
ESCA (n=185)	Macrophage_TIMER	-0.0885428	0.237216	0.422343
ESCA (n=185)	Macrophage_XCELL	0.120752	0.106377	0.231072
ESCA (n=185)	Macrophage/Monocyte_MCPCOUNTER	0.0295302	0.693939	0.843689
GBM (n=153)	Macrophage M0_CIBERSORT	-0.000877767	0.991878	0.993534
GBM (n=153)	Macrophage M0_CIBERSORT-ABS	-0.00605599	0.944007	0.981636
GBM (n=153)	Macrophage M1_CIBERSORT	0.0701326	0.415437	0.618158
GBM (n=153)	Macrophage M1_CIBERSORT-ABS	0.0598956	0.486892	0.682232
GBM (n=153)	Macrophage M1_QUANTISEQ	0.0200177	0.8164	0.914891
GBM (n=153)	Macrophage M1_XCELL	0.0137552	0.873249	0.938978
GBM (n=153)	Macrophage M2_CIBERSORT	0.12034	0.161293	0.322444
GBM (n=153)	Macrophage M2_CIBERSORT-ABS	0.0980136	0.254514	0.441354
GBM (n=153)	Macrophage M2_QUANTISEQ	0.0854478	0.32081	0.514669
GBM (n=153)	Macrophage M2_TIDE	0.193479	0.0234935	0.0734172
GBM (n=153)	Macrophage M2_XCELL	0.0939529	0.274819	0.46356
GBM (n=153)	Macrophage_EPIC	0.0608685	0.47983	0.674235
GBM (n=153)	Macrophage_TIMER	0.126986	0.139218	0.288037
GBM (n=153)	Macrophage_XCELL	0.037801	0.660986	0.821101
GBM (n=153)	Macrophage/Monocyte_MCPCOUNTER	0.0676894	0.43191	0.632064
HNSC (n=522)	Macrophage M0_CIBERSORT	-0.0631775	0.161759	0.322444
HNSC (n=522)	Macrophage M0_CIBERSORT-ABS	0.0388201	0.390228	0.594255
HNSC (n=522)	Macrophage M1_CIBERSORT	0.229354	2.70255e-07	4.05383e-06
HNSC (n=522)	Macrophage M1_CIBERSORT-ABS	0.231617	2.04439e-07	3.14521e-06
HNSC (n=522)	Macrophage M1_QUANTISEQ	0.277857	3.57842e-10	1.07353e-08
HNSC (n=522)	Macrophage M1_XCELL	0.111878	0.0130256	0.0439065
HNSC (n=522)	Macrophage M2_CIBERSORT	-0.0508299	0.260453	0.45035
HNSC (n=522)	Macrophage M2_CIBERSORT-ABS	0.0973055	0.0309299	0.0905265
HNSC (n=522)	Macrophage M2_QUANTISEQ	0.0554433	0.219594	0.401929
HNSC (n=522)	Macrophage M2_TIDE	-0.167329	0.000192684	0.00129899
HNSC (n=522)	Macrophage M2_XCELL	0.00371483	0.934496	0.975964
HNSC (n=522)	Macrophage_EPIC	0.164719	0.000243084	0.00155414
HNSC (n=522)	Macrophage_TIMER	-0.0543168	0.22912	0.416582
HNSC (n=522)	Macrophage_XCELL	0.121884	0.00679488	0.0254808
HNSC (n=522)	Macrophage/Monocyte_MCPCOUNTER	0.211814	2.13507e-06	2.66883e-05
HNSC-HPV- (n=422)	Macrophage M0_CIBERSORT	-0.0130843	0.794186	0.907627
HNSC-HPV- (n=422)	Macrophage M0_CIBERSORT-ABS	0.0584541	0.243444	0.430097
HNSC-HPV- (n=422)	Macrophage M1_CIBERSORT	0.196363	7.70095e-05	0.000577571
HNSC-HPV- (n=422)	Macrophage M1_CIBERSORT-ABS	0.179036	0.000319898	0.00193878
HNSC-HPV- (n=422)	Macrophage M1_QUANTISEQ	0.299728	9.5355e-10	2.38388e-08
HNSC-HPV- (n=422)	Macrophage M1_XCELL	0.141367	0.00461534	0.0179819
HNSC-HPV- (n=422)	Macrophage M2_CIBERSORT	0.0128924	0.79714	0.907627
HNSC-HPV- (n=422)	Macrophage M2_CIBERSORT-ABS	0.0920242	0.0659701	0.158964
HNSC-HPV- (n=422)	Macrophage M2_QUANTISEQ	0.0362193	0.470075	0.670494
HNSC-HPV- (n=422)	Macrophage M2_TIDE	-0.161002	0.00123327	0.00604861
HNSC-HPV- (n=422)	Macrophage M2_XCELL	0.0307772	0.539372	0.727279
HNSC-HPV- (n=422)	Macrophage_EPIC	0.165598	0.000885539	0.0046202
HNSC-HPV- (n=422)	Macrophage_TIMER	0.0200135	0.689851	0.8422
HNSC-HPV- (n=422)	Macrophage_XCELL	0.16668	0.000818045	0.0043436
HNSC-HPV- (n=422)	Macrophage/Monocyte_MCPCOUNTER	0.198258	6.53944e-05	0.000516271
HNSC-HPV+ (n=98)	Macrophage M0_CIBERSORT	-0.117271	0.273747	0.46356
HNSC-HPV+ (n=98)	Macrophage M0_CIBERSORT-ABS	-0.0136856	0.898711	0.958321
HNSC-HPV+ (n=98)	Macrophage M1_CIBERSORT	0.307856	0.00333678	0.0139032
HNSC-HPV+ (n=98)	Macrophage M1_CIBERSORT-ABS	0.301149	0.00413382	0.0167587
HNSC-HPV+ (n=98)	Macrophage M1_QUANTISEQ	0.201954	0.0577092	0.143674
HNSC-HPV+ (n=98)	Macrophage M1_XCELL	-0.0053025	0.960667	0.985486
HNSC-HPV+ (n=98)	Macrophage M2_CIBERSORT	-0.238444	0.0244337	0.0755681
HNSC-HPV+ (n=98)	Macrophage M2_CIBERSORT-ABS	0.0220782	0.837286	0.92309
HNSC-HPV+ (n=98)	Macrophage M2_QUANTISEQ	0.0744954	0.487796	0.682232
HNSC-HPV+ (n=98)	Macrophage M2_TIDE	-0.25914	0.0141981	0.0473271
HNSC-HPV+ (n=98)	Macrophage M2_XCELL	-0.20641	0.0522958	0.134092
HNSC-HPV+ (n=98)	Macrophage_EPIC	0.0839992	0.433845	0.633351
HNSC-HPV+ (n=98)	Macrophage_TIMER	-0.297889	0.00457933	0.0179582
HNSC-HPV+ (n=98)	Macrophage_XCELL	-0.0350843	0.744117	0.880612
HNSC-HPV+ (n=98)	Macrophage/Monocyte_MCPCOUNTER	0.228278	0.0314272	0.0915354
KICH (n=66)	Macrophage M0_CIBERSORT	0.0685651	0.587334	0.776213
KICH (n=66)	Macrophage M0_CIBERSORT-ABS	0.107537	0.393857	0.596753
KICH (n=66)	Macrophage M1_CIBERSORT	0.0249911	0.843354	0.923645
KICH (n=66)	Macrophage M1_CIBERSORT-ABS	0.137409	0.275046	0.46356
KICH (n=66)	Macrophage M1_QUANTISEQ	-0.00968469	0.938968	0.978091
KICH (n=66)	Macrophage M1_XCELL	-0.0687236	0.586469	0.776213
KICH (n=66)	Macrophage M2_CIBERSORT	0.0241225	0.848733	0.92589
KICH (n=66)	Macrophage M2_CIBERSORT-ABS	0.320338	0.00928222	0.0339594
KICH (n=66)	Macrophage M2_QUANTISEQ	0.235259	0.0592291	0.146849
KICH (n=66)	Macrophage M2_TIDE	-0.191563	0.126349	0.266907
KICH (n=66)	Macrophage M2_XCELL	-0.104793	0.406108	0.607643
KICH (n=66)	Macrophage_EPIC	0.120828	0.337678	0.535996
KICH (n=66)	Macrophage_TIMER	0.371696	0.00229915	0.0100693
KICH (n=66)	Macrophage_XCELL	0.0607122	0.630926	0.807097
KICH (n=66)	Macrophage/Monocyte_MCPCOUNTER	0.228257	0.0674323	0.161838
KIRC (n=533)	Macrophage M0_CIBERSORT	-0.188006	4.86601e-05	0.000389281
KIRC (n=533)	Macrophage M0_CIBERSORT-ABS	-0.184046	7.04036e-05	0.000541566
KIRC (n=533)	Macrophage M1_CIBERSORT	0.137358	0.00312461	0.0131102
KIRC (n=533)	Macrophage M1_CIBERSORT-ABS	0.199059	1.66577e-05	0.000149381
KIRC (n=533)	Macrophage M1_QUANTISEQ	0.0542044	0.245433	0.430585
KIRC (n=533)	Macrophage M1_XCELL	0.0571817	0.22042	0.401981
KIRC (n=533)	Macrophage M2_CIBERSORT	0.111359	0.0167596	0.0534881
KIRC (n=533)	Macrophage M2_CIBERSORT-ABS	0.216421	2.7341e-06	3.28093e-05
KIRC (n=533)	Macrophage M2_QUANTISEQ	0.106314	0.0224345	0.0704748
KIRC (n=533)	Macrophage M2_TIDE	-0.0997172	0.0323108	0.0932042
KIRC (n=533)	Macrophage M2_XCELL	0.0651674	0.162447	0.322742
KIRC (n=533)	Macrophage_EPIC	0.073685	0.114121	0.244545
KIRC (n=533)	Macrophage_TIMER	0.169975	0.000246072	0.00155414
KIRC (n=533)	Macrophage_XCELL	0.142084	0.00222873	0.00990548
KIRC (n=533)	Macrophage/Monocyte_MCPCOUNTER	0.327636	5.36728e-13	2.92761e-11
KIRP (n=290)	Macrophage M0_CIBERSORT	-0.0317102	0.612158	0.794286
KIRP (n=290)	Macrophage M0_CIBERSORT-ABS	-0.0261924	0.675405	0.832121
KIRP (n=290)	Macrophage M1_CIBERSORT	-0.062228	0.319425	0.51382
KIRP (n=290)	Macrophage M1_CIBERSORT-ABS	-0.0180471	0.772968	0.899808
KIRP (n=290)	Macrophage M1_QUANTISEQ	0.0152423	0.807499	0.914891
KIRP (n=290)	Macrophage M1_XCELL	-0.232982	0.000159255	0.00111108
KIRP (n=290)	Macrophage M2_CIBERSORT	-0.125568	0.0438925	0.119165
KIRP (n=290)	Macrophage M2_CIBERSORT-ABS	0.040071	0.521674	0.714622
KIRP (n=290)	Macrophage M2_QUANTISEQ	-0.189392	0.00225052	0.00992878
KIRP (n=290)	Macrophage M2_TIDE	-0.0932913	0.135054	0.281363
KIRP (n=290)	Macrophage M2_XCELL	-0.265363	1.56485e-05	0.000144448
KIRP (n=290)	Macrophage_EPIC	-0.187944	0.00243562	0.0105135
KIRP (n=290)	Macrophage_TIMER	0.0779699	0.211957	0.392896
KIRP (n=290)	Macrophage_XCELL	-0.200554	0.00120076	0.00600382
KIRP (n=290)	Macrophage/Monocyte_MCPCOUNTER	0.0445021	0.476656	0.673866
LGG (n=516)	Macrophage M0_CIBERSORT	-0.0595992	0.193335	0.367092
LGG (n=516)	Macrophage M0_CIBERSORT-ABS	-0.0592565	0.195914	0.369649
LGG (n=516)	Macrophage M1_CIBERSORT	-0.0142371	0.756203	0.889651
LGG (n=516)	Macrophage M1_CIBERSORT-ABS	0.0158652	0.72936	0.868285
LGG (n=516)	Macrophage M1_QUANTISEQ	0.259381	8.6727e-09	1.67859e-07
LGG (n=516)	Macrophage M1_XCELL	0.261817	6.21624e-09	1.24325e-07
LGG (n=516)	Macrophage M2_CIBERSORT	0.210683	3.37786e-06	3.97395e-05
LGG (n=516)	Macrophage M2_CIBERSORT-ABS	0.263929	4.64432e-09	9.60893e-08
LGG (n=516)	Macrophage M2_QUANTISEQ	0.225369	6.40523e-07	8.73441e-06
LGG (n=516)	Macrophage M2_TIDE	-0.0900531	0.0491033	0.128096
LGG (n=516)	Macrophage M2_XCELL	-0.0814377	0.0752753	0.177118
LGG (n=516)	Macrophage_EPIC	0.191311	2.546e-05	0.000218229
LGG (n=516)	Macrophage_TIMER	0.138233	0.00245486	0.0105208
LGG (n=516)	Macrophage_XCELL	0.204773	6.3861e-06	6.84225e-05
LGG (n=516)	Macrophage/Monocyte_MCPCOUNTER	0.346306	6.49138e-15	4.86853e-13
LIHC (n=371)	Macrophage M0_CIBERSORT	0.161283	0.00265994	0.0113189
LIHC (n=371)	Macrophage M0_CIBERSORT-ABS	0.230868	1.48256e-05	0.00013899
LIHC (n=371)	Macrophage M1_CIBERSORT	-0.10711	0.0468146	0.124286
LIHC (n=371)	Macrophage M1_CIBERSORT-ABS	0.136244	0.0113009	0.0387461
LIHC (n=371)	Macrophage M1_QUANTISEQ	0.29623	2.03917e-08	3.82345e-07
LIHC (n=371)	Macrophage M1_XCELL	0.0873915	0.105139	0.230231
LIHC (n=371)	Macrophage M2_CIBERSORT	0.0768702	0.154236	0.312276
LIHC (n=371)	Macrophage M2_CIBERSORT-ABS	0.336315	1.4379e-10	4.54075e-09
LIHC (n=371)	Macrophage M2_QUANTISEQ	0.232035	1.33814e-05	0.000129497
LIHC (n=371)	Macrophage M2_TIDE	-0.147246	0.00614386	0.0234797
LIHC (n=371)	Macrophage M2_XCELL	-0.206066	0.000115697	0.000846561
LIHC (n=371)	Macrophage_EPIC	-0.405958	4.03828e-15	4.03828e-13
LIHC (n=371)	Macrophage_TIMER	0.269685	3.66583e-07	5.36463e-06
LIHC (n=371)	Macrophage_XCELL	-0.00525571	0.922514	0.971068
LIHC (n=371)	Macrophage/Monocyte_MCPCOUNTER	0.409643	2.15751e-15	2.58901e-13
LUAD (n=515)	Macrophage M0_CIBERSORT	-0.0205176	0.649501	0.81327
LUAD (n=515)	Macrophage M0_CIBERSORT-ABS	-0.00179504	0.968288	0.985486
LUAD (n=515)	Macrophage M1_CIBERSORT	0.051866	0.250365	0.435711
LUAD (n=515)	Macrophage M1_CIBERSORT-ABS	0.0816835	0.0699719	0.165941
LUAD (n=515)	Macrophage M1_QUANTISEQ	0.137424	0.00222751	0.00990548
LUAD (n=515)	Macrophage M1_XCELL	0.110014	0.0145285	0.0481608
LUAD (n=515)	Macrophage M2_CIBERSORT	0.156908	0.000470945	0.00269111
LUAD (n=515)	Macrophage M2_CIBERSORT-ABS	0.164913	0.000235458	0.0015356
LUAD (n=515)	Macrophage M2_QUANTISEQ	-0.0138146	0.759628	0.890873
LUAD (n=515)	Macrophage M2_TIDE	-0.240019	6.85929e-08	1.14321e-06
LUAD (n=515)	Macrophage M2_XCELL	-0.027843	0.53739	0.727279
LUAD (n=515)	Macrophage_EPIC	0.126383	0.00494936	0.0191588
LUAD (n=515)	Macrophage_TIMER	0.192569	1.66809e-05	0.000149381
LUAD (n=515)	Macrophage_XCELL	0.114359	0.011051	0.038269
LUAD (n=515)	Macrophage/Monocyte_MCPCOUNTER	0.141792	0.00159799	0.00754955
LUSC (n=501)	Macrophage M0_CIBERSORT	0.033663	0.46326	0.664966
LUSC (n=501)	Macrophage M0_CIBERSORT-ABS	0.0624342	0.173408	0.337808
LUSC (n=501)	Macrophage M1_CIBERSORT	0.122738	0.00727974	0.0271295
LUSC (n=501)	Macrophage M1_CIBERSORT-ABS	0.117851	0.00999148	0.0358975
LUSC (n=501)	Macrophage M1_QUANTISEQ	0.0101293	0.825363	0.91707
LUSC (n=501)	Macrophage M1_XCELL	0.0131016	0.775334	0.899808
LUSC (n=501)	Macrophage M2_CIBERSORT	0.0105632	0.81801	0.914891
LUSC (n=501)	Macrophage M2_CIBERSORT-ABS	0.0285704	0.533629	0.726026
LUSC (n=501)	Macrophage M2_QUANTISEQ	-0.0611694	0.182301	0.351706
LUSC (n=501)	Macrophage M2_TIDE	-0.0709403	0.121805	0.258243
LUSC (n=501)	Macrophage M2_XCELL	-0.0256374	0.576467	0.76657
LUSC (n=501)	Macrophage_EPIC	0.0473744	0.301821	0.49344
LUSC (n=501)	Macrophage_TIMER	-0.0945542	0.038989	0.107804
LUSC (n=501)	Macrophage_XCELL	0.0479928	0.295547	0.487165
LUSC (n=501)	Macrophage/Monocyte_MCPCOUNTER	0.140067	0.00216797	0.00978034
OV (n=303)	Macrophage M0_CIBERSORT	0.212386	0.000743263	0.00398177
OV (n=303)	Macrophage M0_CIBERSORT-ABS	0.22739	0.000297349	0.0018205
OV (n=303)	Macrophage M1_CIBERSORT	0.0683799	0.282444	0.470739
OV (n=303)	Macrophage M1_CIBERSORT-ABS	0.108539	0.0874241	0.198691
OV (n=303)	Macrophage M1_QUANTISEQ	0.0798469	0.209251	0.389908
OV (n=303)	Macrophage M1_XCELL	-0.0559602	0.379248	0.581726
OV (n=303)	Macrophage M2_CIBERSORT	-0.126509	0.0461247	0.123548
OV (n=303)	Macrophage M2_CIBERSORT-ABS	0.0291939	0.646628	0.812799
OV (n=303)	Macrophage M2_QUANTISEQ	-0.042289	0.506531	0.698664
OV (n=303)	Macrophage M2_TIDE	-0.102238	0.107531	0.232082
OV (n=303)	Macrophage M2_XCELL	0.0806208	0.204856	0.383952
OV (n=303)	Macrophage_EPIC	0.00342593	0.957104	0.985012
OV (n=303)	Macrophage_TIMER	0.138397	0.0290063	0.0861573
OV (n=303)	Macrophage_XCELL	0.0256585	0.687012	0.8422
OV (n=303)	Macrophage/Monocyte_MCPCOUNTER	0.0501877	0.430428	0.631434
PRAD (n=498)	Macrophage M0_CIBERSORT	0.151247	0.00197888	0.00913329
PRAD (n=498)	Macrophage M0_CIBERSORT-ABS	0.208176	1.86736e-05	0.000164767
PRAD (n=498)	Macrophage M1_CIBERSORT	0.173746	0.000370578	0.00213795
PRAD (n=498)	Macrophage M1_CIBERSORT-ABS	0.286926	2.51706e-09	5.80861e-08
PRAD (n=498)	Macrophage M1_QUANTISEQ	0.314504	5.2878e-11	1.86628e-09
PRAD (n=498)	Macrophage M1_XCELL	-0.0138743	0.777834	0.899842
PRAD (n=498)	Macrophage M2_CIBERSORT	-0.091452	0.062384	0.152777
PRAD (n=498)	Macrophage M2_CIBERSORT-ABS	0.17054	0.000476734	0.0026985
PRAD (n=498)	Macrophage M2_QUANTISEQ	0.00576673	0.90665	0.961624
PRAD (n=498)	Macrophage M2_TIDE	-0.121857	0.0128749	0.0436436
PRAD (n=498)	Macrophage M2_XCELL	-0.0546658	0.265947	0.455909
PRAD (n=498)	Macrophage_EPIC	0.101799	0.0379449	0.105595
PRAD (n=498)	Macrophage_TIMER	0.140832	0.00400025	0.0163276
PRAD (n=498)	Macrophage_XCELL	0.0353623	0.471952	0.670494
PRAD (n=498)	Macrophage/Monocyte_MCPCOUNTER	0.299149	4.77731e-10	1.36495e-08
SKCM (n=471)	Macrophage M0_CIBERSORT	-0.0478112	0.307789	0.497772
SKCM (n=471)	Macrophage M0_CIBERSORT-ABS	0.116786	0.0124781	0.0425391
SKCM (n=471)	Macrophage M1_CIBERSORT	0.208012	7.33427e-06	7.58717e-05
SKCM (n=471)	Macrophage M1_CIBERSORT-ABS	0.314459	6.0174e-12	2.40696e-10
SKCM (n=471)	Macrophage M1_QUANTISEQ	0.149067	0.00139432	0.00667001
SKCM (n=471)	Macrophage M1_XCELL	0.00131563	0.977624	0.986785
SKCM (n=471)	Macrophage M2_CIBERSORT	0.0977729	0.0366691	0.103293
SKCM (n=471)	Macrophage M2_CIBERSORT-ABS	0.344401	3.58402e-14	2.38934e-12
SKCM (n=471)	Macrophage M2_QUANTISEQ	-0.078925	0.0919436	0.205844
SKCM (n=471)	Macrophage M2_TIDE	-0.180686	0.000102729	0.000760956
SKCM (n=471)	Macrophage M2_XCELL	-0.252838	4.26458e-08	7.31071e-07
SKCM (n=471)	Macrophage_EPIC	0.0628353	0.179949	0.349416
SKCM (n=471)	Macrophage_TIMER	0.0583887	0.212819	0.392896
SKCM (n=471)	Macrophage_XCELL	0.00860021	0.854522	0.927468
SKCM (n=471)	Macrophage/Monocyte_MCPCOUNTER	0.315307	5.24482e-12	2.24778e-10
SKCM-Metastasis (n=368)	Macrophage M0_CIBERSORT	-0.0197338	0.711373	0.855359
SKCM-Metastasis (n=368)	Macrophage M0_CIBERSORT-ABS	0.11712	0.0275675	0.0835379
SKCM-Metastasis (n=368)	Macrophage M1_CIBERSORT	0.182744	0.000549699	0.00308242
SKCM-Metastasis (n=368)	Macrophage M1_CIBERSORT-ABS	0.251106	1.71241e-06	2.18606e-05
SKCM-Metastasis (n=368)	Macrophage M1_QUANTISEQ	0.0612307	0.250534	0.435711
SKCM-Metastasis (n=368)	Macrophage M1_XCELL	-0.0759566	0.153834	0.312276
SKCM-Metastasis (n=368)	Macrophage M2_CIBERSORT	0.112449	0.0344353	0.0983866
SKCM-Metastasis (n=368)	Macrophage M2_CIBERSORT-ABS	0.280997	7.57559e-08	1.22847e-06
SKCM-Metastasis (n=368)	Macrophage M2_QUANTISEQ	-0.113842	0.0322483	0.0932042
SKCM-Metastasis (n=368)	Macrophage M2_TIDE	-0.0925302	0.0821194	0.189506
SKCM-Metastasis (n=368)	Macrophage M2_XCELL	-0.319707	7.44659e-10	1.94259e-08
SKCM-Metastasis (n=368)	Macrophage_EPIC	7.42629e-05	0.998889	0.998889
SKCM-Metastasis (n=368)	Macrophage_TIMER	0.0150113	0.778364	0.899842
SKCM-Metastasis (n=368)	Macrophage_XCELL	-0.0907481	0.0882138	0.199729
SKCM-Metastasis (n=368)	Macrophage/Monocyte_MCPCOUNTER	0.252839	1.44406e-06	1.88356e-05
SKCM-Primary (n=103)	Macrophage M0_CIBERSORT	-0.257204	0.00906269	0.0333596
SKCM-Primary (n=103)	Macrophage M0_CIBERSORT-ABS	-0.0974999	0.329615	0.525981
SKCM-Primary (n=103)	Macrophage M1_CIBERSORT	0.239619	0.0152805	0.0498277
SKCM-Primary (n=103)	Macrophage M1_CIBERSORT-ABS	0.348924	0.000325423	0.00195254
SKCM-Primary (n=103)	Macrophage M1_QUANTISEQ	0.278835	0.00454115	0.0179505
SKCM-Primary (n=103)	Macrophage M1_XCELL	-0.0532173	0.595266	0.780484
SKCM-Primary (n=103)	Macrophage M2_CIBERSORT	0.119353	0.232154	0.419138
SKCM-Primary (n=103)	Macrophage M2_CIBERSORT-ABS	0.415426	1.41324e-05	0.000134594
SKCM-Primary (n=103)	Macrophage M2_QUANTISEQ	-0.170852	0.0859968	0.19619
SKCM-Primary (n=103)	Macrophage M2_TIDE	-0.303176	0.00195204	0.00907927
SKCM-Primary (n=103)	Macrophage M2_XCELL	-0.253559	0.0101281	0.0359209
SKCM-Primary (n=103)	Macrophage_EPIC	0.0479362	0.632337	0.807097
SKCM-Primary (n=103)	Macrophage_TIMER	0.128078	0.199537	0.375304
SKCM-Primary (n=103)	Macrophage_XCELL	0.011545	0.908314	0.961624
SKCM-Primary (n=103)	Macrophage/Monocyte_MCPCOUNTER	0.279714	0.00441029	0.0176412
STAD (n=415)	Macrophage M0_CIBERSORT	-0.00934742	0.856071	0.927468
STAD (n=415)	Macrophage M0_CIBERSORT-ABS	0.00323774	0.949907	0.984359
STAD (n=415)	Macrophage M1_CIBERSORT	0.089245	0.0827162	0.190152
STAD (n=415)	Macrophage M1_CIBERSORT-ABS	0.0837751	0.103439	0.227339
STAD (n=415)	Macrophage M1_QUANTISEQ	0.101468	0.0483875	0.127896
STAD (n=415)	Macrophage M1_XCELL	-0.0164812	0.749107	0.884772
STAD (n=415)	Macrophage M2_CIBERSORT	0.0115785	0.822234	0.915289
STAD (n=415)	Macrophage M2_CIBERSORT-ABS	0.0252803	0.623704	0.801524
STAD (n=415)	Macrophage M2_QUANTISEQ	-0.0195629	0.704223	0.850168
STAD (n=415)	Macrophage M2_TIDE	-0.161054	0.00165755	0.00776976
STAD (n=415)	Macrophage M2_XCELL	0.0236022	0.646929	0.812799
STAD (n=415)	Macrophage_EPIC	-0.0457957	0.373966	0.578298
STAD (n=415)	Macrophage_TIMER	-0.0157282	0.760211	0.890873
STAD (n=415)	Macrophage_XCELL	0.0479722	0.351662	0.549472
STAD (n=415)	Macrophage/Monocyte_MCPCOUNTER	0.0461104	0.370688	0.57471
TGCT (n=150)	Macrophage M0_CIBERSORT	0.010367	0.900821	0.958321
TGCT (n=150)	Macrophage M0_CIBERSORT-ABS	0.0909983	0.273012	0.46356
TGCT (n=150)	Macrophage M1_CIBERSORT	0.197404	0.0165483	0.0530962
TGCT (n=150)	Macrophage M1_CIBERSORT-ABS	0.278048	0.000649943	0.00354514
TGCT (n=150)	Macrophage M1_QUANTISEQ	0.137354	0.0971196	0.215821
TGCT (n=150)	Macrophage M1_XCELL	0.0568734	0.493835	0.687474
TGCT (n=150)	Macrophage M2_CIBERSORT	-0.13313	0.107945	0.23214
TGCT (n=150)	Macrophage M2_CIBERSORT-ABS	0.00277711	0.973369	0.985486
TGCT (n=150)	Macrophage M2_QUANTISEQ	0.133607	0.106678	0.231072
TGCT (n=150)	Macrophage M2_TIDE	-0.152743	0.064754	0.157937
TGCT (n=150)	Macrophage M2_XCELL	0.0961468	0.246679	0.431509
TGCT (n=150)	Macrophage_EPIC	0.18627	0.0238879	0.074263
TGCT (n=150)	Macrophage_TIMER	0.182546	0.0268988	0.0827656
TGCT (n=150)	Macrophage_XCELL	0.0871412	0.293944	0.485857
TGCT (n=150)	Macrophage/Monocyte_MCPCOUNTER	0.208929	0.011098	0.038269
THCA (n=509)	Macrophage M0_CIBERSORT	0.116576	0.00995382	0.0358975
THCA (n=509)	Macrophage M0_CIBERSORT-ABS	0.200633	7.95988e-06	8.0948e-05
THCA (n=509)	Macrophage M1_CIBERSORT	0.0769654	0.0894359	0.201735
THCA (n=509)	Macrophage M1_CIBERSORT-ABS	0.144291	0.00139321	0.00667001
THCA (n=509)	Macrophage M1_QUANTISEQ	0.276342	5.28893e-10	1.44244e-08
THCA (n=509)	Macrophage M1_XCELL	0.0132512	0.770293	0.899175
THCA (n=509)	Macrophage M2_CIBERSORT	-0.0465221	0.305068	0.496045
THCA (n=509)	Macrophage M2_CIBERSORT-ABS	0.342979	6.44544e-15	4.86853e-13
THCA (n=509)	Macrophage M2_QUANTISEQ	0.0012176	0.978596	0.986785
THCA (n=509)	Macrophage M2_TIDE	-0.262568	3.88353e-09	8.32186e-08
THCA (n=509)	Macrophage M2_XCELL	-0.19747	1.11069e-05	0.000111069
THCA (n=509)	Macrophage_EPIC	0.146007	0.00121867	0.006043
THCA (n=509)	Macrophage_TIMER	0.110312	0.0147662	0.0486797
THCA (n=509)	Macrophage_XCELL	0.0648546	0.152569	0.311365
THCA (n=509)	Macrophage/Monocyte_MCPCOUNTER	0.227526	3.7725e-07	5.38928e-06
THYM (n=120)	Macrophage M0_CIBERSORT	-0.350844	0.000120936	0.000874239
THYM (n=120)	Macrophage M0_CIBERSORT-ABS	-0.333358	0.000272086	0.00170054
THYM (n=120)	Macrophage M1_CIBERSORT	-0.305183	0.000911655	0.00470868
THYM (n=120)	Macrophage M1_CIBERSORT-ABS	-0.275642	0.00286718	0.0121148
THYM (n=120)	Macrophage M1_QUANTISEQ	-0.39652	1.14939e-05	0.000113055
THYM (n=120)	Macrophage M1_XCELL	-0.225755	0.0152699	0.0498277
THYM (n=120)	Macrophage M2_CIBERSORT	-0.372668	4.10459e-05	0.000332805
THYM (n=120)	Macrophage M2_CIBERSORT-ABS	-0.340032	0.000200787	0.00133858
THYM (n=120)	Macrophage M2_QUANTISEQ	-0.408082	5.98038e-06	6.64487e-05
THYM (n=120)	Macrophage M2_TIDE	0.301827	0.00104481	0.00531257
THYM (n=120)	Macrophage M2_XCELL	-0.181618	0.0520706	0.134092
THYM (n=120)	Macrophage_EPIC	-0.379477	2.8827e-05	0.000243608
THYM (n=120)	Macrophage_TIMER	-0.0758381	0.420503	0.619906
THYM (n=120)	Macrophage_XCELL	-0.297553	0.00123996	0.00604861
THYM (n=120)	Macrophage/Monocyte_MCPCOUNTER	-0.331782	0.000292033	0.00180639
UCEC (n=545)	Macrophage M0_CIBERSORT	-0.0430263	0.690604	0.8422
UCEC (n=545)	Macrophage M0_CIBERSORT-ABS	-0.00608747	0.955111	0.984651
UCEC (n=545)	Macrophage M1_CIBERSORT	0.150933	0.160411	0.322444
UCEC (n=545)	Macrophage M1_CIBERSORT-ABS	0.153044	0.154577	0.312276
UCEC (n=545)	Macrophage M1_QUANTISEQ	0.128551	0.232622	0.419138
UCEC (n=545)	Macrophage M1_XCELL	-0.210414	0.0490994	0.128096
UCEC (n=545)	Macrophage M2_CIBERSORT	-0.187239	0.0806672	0.187598
UCEC (n=545)	Macrophage M2_CIBERSORT-ABS	-0.0440987	0.683298	0.840121
UCEC (n=545)	Macrophage M2_QUANTISEQ	-0.102981	0.33969	0.537769
UCEC (n=545)	Macrophage M2_TIDE	-0.111053	0.0576069	0.143674
UCEC (n=545)	Macrophage M2_XCELL	-0.234087	0.0281544	0.0844631
UCEC (n=545)	Macrophage_EPIC	-0.234167	0.0280994	0.0844631
UCEC (n=545)	Macrophage_TIMER	-0.201462	0.0598078	0.147674
UCEC (n=545)	Macrophage_XCELL	-0.164011	0.126781	0.266907
UCEC (n=545)	Macrophage/Monocyte_MCPCOUNTER	-0.0808611	0.453902	0.654666
UCS (n=57)	Macrophage M0_CIBERSORT	-0.0367308	0.794003	0.907627
UCS (n=57)	Macrophage M0_CIBERSORT-ABS	0.0245181	0.861658	0.929847
UCS (n=57)	Macrophage M1_CIBERSORT	-0.105665	0.451436	0.652678
UCS (n=57)	Macrophage M1_CIBERSORT-ABS	-0.0842924	0.548443	0.737816
UCS (n=57)	Macrophage M1_QUANTISEQ	0.155732	0.265484	0.455909
UCS (n=57)	Macrophage M1_XCELL	-0.017582	0.900558	0.958321
UCS (n=57)	Macrophage M2_CIBERSORT	0.0441896	0.753378	0.888069
UCS (n=57)	Macrophage M2_CIBERSORT-ABS	0.0238632	0.865318	0.93212
UCS (n=57)	Macrophage M2_QUANTISEQ	-0.0782675	0.577483	0.76657
UCS (n=57)	Macrophage M2_TIDE	0.00477531	0.972928	0.985486
UCS (n=57)	Macrophage M2_XCELL	-0.0613088	0.662763	0.821606
UCS (n=57)	Macrophage_EPIC	0.0261029	0.852812	0.927468
UCS (n=57)	Macrophage_TIMER	0.230634	0.0966163	0.215501
UCS (n=57)	Macrophage_XCELL	-0.0520411	0.711321	0.855359
UCS (n=57)	Macrophage/Monocyte_MCPCOUNTER	0.0833638	0.552873	0.742111
